1 **PDGFRA Defines the Mesenchymal Stem Cell Kaposi's Sarcoma**  
2 **Progenitors by Enabling KSHV Oncogenesis in an Angiogenic**  
3 **Environment**

4  
5 Julian Naipauer<sup>1,2</sup>, Santas Rosario<sup>1</sup>, Sachin Gupta<sup>1</sup>, Courtney Premer<sup>3</sup>, Omayra Mendez<sup>1</sup>, Mariana  
6 Schlesinger<sup>1</sup>, Virginia Ponzinibbio<sup>1,2</sup>, Vaibhav Jain<sup>4</sup>, Lauren Gay<sup>4</sup>, Rolf Renne<sup>4</sup>, Ho Lam Chan<sup>5</sup>, Lluís  
7 Morey<sup>5</sup>, Daria Salyakina<sup>1</sup>, Martin Abba<sup>7,2</sup>, Sion Williams<sup>6,2</sup>, Joshua M. Hare<sup>3</sup>, Pascal J Goldschmidt-  
8 Clermont<sup>1</sup> and Enrique A. Mesri<sup>1,2@</sup>.

9 <sup>1</sup>Tumor Biology Program, Sylvester Comprehensive Cancer Center and Miami Center for AIDS  
10 Research, Department of Microbiology and Immunology, <sup>2</sup>UM-CFAR/ Sylvester CCC Argentina  
11 Consortium for Research and Training in Virally induced AIDS-Malignancies, <sup>3</sup>Interdisciplinary Stem Cell  
12 Institute; University of Miami Miller School of Medicine, Miami, FL 33136, <sup>4</sup>Department of Molecular  
13 Genetics and Microbiology, University of Florida, Gainesville, FL 32610, USA. <sup>5</sup>Department of Human  
14 Genetics, <sup>6</sup>Neurology Basic Science Division, Sylvester Comprehensive Cancer Center; University of  
15 Miami Miller School of Medicine, Miami, FL 33136; <sup>7</sup>Centro de Investigaciones Inmunológicas Básicas y  
16 Aplicadas, Facultad de Ciencias Médicas, Universidad Nacional de La Plata, La Plata, Argentina.

17 @To whom correspondence should be addressed

18 Enrique A. Mesri, PhD

19 Department of Microbiology and Immunology

20 Sylvester Comprehensive Cancer Center

21 University of Miami Miller School of Medicine

22 1550 NW 10<sup>th</sup> Ave, Papanicolau Bldg. Room 219, Miami, FL 33136

23 E-mails: [emesri@med.miami.edu](mailto:emesri@med.miami.edu)

24 **ABSTRACT**

25 **Kaposi's sarcoma (KS) is an AIDS-defining cancer caused by the KS-associated**  
26 **herpesvirus (KSHV). Unanswered questions regarding KS are its cellular**  
27 **ontology and the conditions conducive to viral oncogenesis. We identify**  
28 **PDGFRA(+)/SCA-1(+) bone marrow-derived mesenchymal stem cells (P $\alpha$ (+)S**  
29 **MSCs) as KS spindle-cell progenitors and found that pro-angiogenic**  
30 **environmental conditions typical of KS are critical for KSHV sarcomagenesis.**  
31 **This is because growth in KS-like conditions generates a de-repressed KSHV**  
32 **epigenome allowing oncogenic KSHV gene expression in infected P $\alpha$ (+)S**  
33 **MSCs. Furthermore, these growth conditions allow KSHV-infected P $\alpha$ (+)S**  
34 **MSCs to overcome KSHV-driven oncogene-induced senescence and cell cycle**  
35 **arrest via a PDGFRA-signaling mechanism; thus identifying PDGFRA not only**  
36 **as a phenotypic determinant for KS-progenitors but also as a critical enabler**  
37 **for viral oncogenesis.**

38

39

40

41

## 42 AUTHOR SUMMARY

43 Identification of the KS progenitor cell creates the possibility of studying viral  
44 oncogenesis and its determinants from its initial steps as a continuum. It also  
45 increases our understanding of pathogenic mechanisms and disease  
46 preferential tropism. Hereby we identify P $\alpha$ (+)S-MSCs as KS progenitors, in  
47 which KSHV infection has oncogenic consequences; only when these cells are  
48 in a pro-angiogenic environment in which PDGFRA activation enables an  
49 oncogenic de-repressed KSHV epigenome. These results identify a KS-  
50 progenitor population in the P $\alpha$ (+)S-MSCs and point to pro-angiogenic  
51 environmental conditions as essential for oncogenic viral gene expression and  
52 transformation. We designed a novel model of KSHV oncogenesis, creating a  
53 very robust platform to identify KSHV oncogenic pathways and their  
54 relationship with cellular lineages and extracellular growth environments.

55

56

57

58

59

60

## 61 INTRODUCTION

62           Viral cancers account for up to 12% of all human cancers and are characterized by the  
63 long incubation periods and the fact that the majority of infected individuals do not develop  
64 cancer. This is consequence of the need for specific host environmental factors or conditions  
65 such as immunosuppression, which are necessary to enable the expression of the oncogenic  
66 viral gene expression programs leading to full viral-mediated cellular transformation [1].  
67 Kaposi's sarcoma (KS) is an AIDS-defining cancer and a major global health challenge caused  
68 by the Kaposi's sarcoma-associated herpesvirus (KSHV) [2-4]. It is characterized by the  
69 proliferation of spindle-shaped cells (SC), inflammatory infiltrate and abundant angiogenesis  
70 with blood vessel erythrocyte extravasation [2-5]. KS presents in 4 different clinical forms:  
71 classical, endemic, iatrogenic and epidemic/AIDS-associated. Classical KS affects mostly  
72 elderly individuals of Ashkenazy Jews or Mediterranean descent and more recently at-risk  
73 populations such as men who have sex with men (MSM). Endemic KS affects children, men,  
74 and women in Sub-Saharan Africa. Iatrogenic KS is characteristic of transplant  
75 immunosuppression, in particular, renal transplant, and epidemic or AIDS-associated KS  
76 predominantly affects MSMs infected with HIV [4]. AIDS-associated immunosuppression and  
77 HIV constitute important KS co-factors, yet other host factors may account for the  
78 oncogenicity of KSHV and HIV co-infection in specific "at-risk" populations [6]. Although the  
79 incidence of AIDS-KS in the western world has declined since the implementation of ART,  
80 more than 50% of advanced AIDS-KS patients never achieve total remission [6-8]. Moreover,  
81 KSHV prevalence and KS appear to be increasing in ART-treated HIV-infected patients with  
82 controlled viremias [9, 10]. Critical pending questions on KS are its cellular ontology and the

83 conditions conducive to viral pathogenicity, which are important to understanding KSHV  
84 oncogenic mechanisms that could lead to prevention approaches or the discovery of  
85 therapeutic targets.

86         The origins of KS spindle cells (SC) have long been debated, as these cells express  
87 markers of both lymphatic and blood vessel endothelium (podoplanin, VEGFR<sub>3</sub>, VEGF C and D,  
88 CXCR<sub>4</sub>, DLL<sub>4</sub>, VEGFR<sub>1</sub>, CXCL<sub>12</sub>, CD<sub>34</sub>)[11, 12] ,as well of dendritic cells (Factor XIII),  
89 macrophages (CD68), smooth muscle cells (SMA)[2] and mesenchymal stem cells (vimentin,  
90 PDGFRA)[13, 14]. This remarkable heterogeneity, together with the multifocal manifestation  
91 of many KS cases, suggests the existence of a circulating progenitor such as mesenchymal  
92 stem cells or endothelial cell progenitors [6, 15-17]. Spindle cell precursors were found to be  
93 increased in the blood of AIDS-KS patients, which upon KSHV infection and or inflammatory  
94 conditions may further differentiate into endothelial, smooth muscle, fibroblastic and  
95 myofibroblastic cells [18-20].

96         KSHV encodes a plethora of latent and lytic genes with pathogenic and oncogenic  
97 potential [2, 3]. KS lesions are composed of SC latently infected with KSHV, as well as cells  
98 expressing lytic genes that have been implicated in the development of the KS  
99 angioproliferative phenotype via paracrine and autocrine mechanisms [2, 3, 5, 21-23]. These  
100 mechanisms are mediated in part by the ability of lytic viral genes such as the G protein-  
101 coupled receptor (vGPCR/ORF74), K1 and K15, to upregulate angiogenesis and KS-cell growth  
102 factors [2, 3, 14, 21]. Although KSHV infection results in important morphological and  
103 transcriptional changes that convey traits of malignant transformation, few KSHV-infected  
104 cellular types had become fully tumorigenic [2, 5]. They are the basis for models of KSHV-

105 tumorigenesis in murine, rat and human cells [24-28]. In a KSHV tumorigenesis model in nude  
106 mice generated by transfecting KSHVBac36 to mouse endothelial lineage cells [26], we found  
107 that malignancy was only manifested *in vivo* and occurred with concomitant upregulation of  
108 oncogenic KSHV lytic genes, angiogenesis growth factors and their tyrosine kinase receptors  
109 that are characteristic of human KS lesions [2, 26]. Using this model we show that the most  
110 prominently activated tyrosine kinase was PDGFRA [14], which was activated by lytic KSHV  
111 genes via a ligand-mediated mechanism and necessary for KSHV sarcomagenesis [14]. More  
112 importantly, PDGFRA was prominently expressed and phosphorylated in the vast majority of  
113 AIDS-KS tumors [14]. This together with the relative success of Imatinib Phase II trials  
114 targeting this receptor in KS [29] and the fact that PDGFRA is a driver of many sarcomas  
115 identified PDGFRA as an oncogenic driver in KS [14].

116         Viral cancers like KS are the consequence of infection with oncoviruses that evolved  
117 powerful mechanisms to persist and replicate through deregulation of host oncogenic  
118 pathways--such as PDGFRA signaling-- conveying cancer hallmarks to the infected cell [1]. In  
119 searching for the identity of the oncogenic KS progenitor, we reasoned that if KSHV evolved its  
120 molecular machinery to activate PDGFRA signaling, a plausible oncogenic progenitor should  
121 be a pluripotent cell where PDGFRA plays a major proliferative and survival role, such as  
122 mesenchymal stem cell (MSC) [30]. This would also be consistent with the mesenchymal origin  
123 of sarcomas, many of which are driven by PDGFRA [31-33]. PDGFRA is a specific mesenchymal  
124 lineage phenotypic marker, and together with the stem cell antigen-1 (Sca-1), is used to  
125 identify pluripotent mesenchymal stem cells (P $\alpha$ (+)S- MSCs)[30]. P $\alpha$ (+)S-MSCs have primitive  
126 characteristics consistent with conventional MSC populations and an *in vitro* differentiation

127 assay showed that single P $\alpha$ (+)S-derived MSCs differentiated not only into chondrocytes and  
128 osteocytes but also into endothelial cells [30]. We hypothesized that PDGFRA-positive/SCA1-  
129 positive MSCs would likely serve as a natural target of KSHV infection, thus prompting  
130 oncogenic transformation via a PDGFRA-driven mechanism. The possibility of a mesenchymal  
131 progenitor for KS has been suggested by the work of several groups [28, 34-38]. In particular,  
132 mesenchymal and precursor markers are parts of the immunohistochemical features of KS  
133 [34]. In addition, rat and human MSCs from bone marrow and other origins are susceptible to  
134 KSHV infection [28, 35, 37, 38] and KSHV infection promoted multi-lineage differentiation and  
135 mesenchymal-to-endothelial transition into human oral MSC, providing evidence for human  
136 oral MSCs being a potential origin of Kaposi sarcoma cells [36].

137         Hereby we study the infection of murine and human PDGFRA+ MSC progenitors to  
138 generate a “*de novo*”, cell type-defined tumorigenesis system that could have the advantage to  
139 follow the process of tumorigenesis from a primary non-transformed cell, as well as identifying  
140 oncogenesis environmental conditions and molecular mechanisms critical for this process. In  
141 the present manuscript, we identify PDGFRA(+)/SCA-1(+) bone marrow-derived mesenchymal  
142 stem cells (P $\alpha$ (+)S MSCs) as KS spindle cell progenitors and we also identify pro-angiogenic  
143 environmental conditions typical of KS as critical for KSHV sarcomagenesis. We found that  
144 growth in KS-like conditions generates a de-repressed KSHV epigenome, allowing oncogenic  
145 KSHV gene expression in infected P $\alpha$ (+)S MSCs. Furthermore, these growth conditions  
146 allow KSHV-infected P $\alpha$ (+)S MSCs to overcome KSHV-driven oncogene-induced senescence  
147 and cell cycle arrest via a PDGFRA-signaling mechanism; thus identifying PDGFRA not only as  
148 a phenotypic determinant for KS-progenitors but also as a critical enabler for viral oncogenesis.

149

## 150 **RESULTS**

### 151 **KSHV latency establishment in mouse bone marrow-derived MSC**

152           In order to identify spindle-cell KS progenitors, we purified adherent spindle-shaped  
153 mouse bone marrow-derived MSCs, from different mouse donors, that were positive for  
154 PDGFRA (60%) and the stem cell antigen SCA-1 (100%) (Figure 1A), as previously described  
155 [30, 39]. We sorted for PDGFRA-positive ( $P\alpha(+)$ S) and PDGFRA-negative ( $P\alpha(-)$ S) MSCs  
156 populations (Figure 1A), after infection with rKSHV.219 [40] the sorted populations were  
157 cultured in mesenchymal stem cell maintenance media (MSC-media). We monitored KSHV  
158 infection by examining the expression of a GFP cassette in the viral genome, and KSHV lytic  
159 infection through expression of RFP under the lytic viral PAN promoter. 72 hours post infection  
160 (hpi), we added puromycin to select for infected cells. Using this method, we successfully  
161 generated mouse bone marrow-derived MSC latently infected with KSHV (K- $P\alpha(-)$ S and K- $P\alpha$   
162 (+)S) (Figure 1B). After several passages, these latently infected cultures continued to express  
163 GFP and the KSHV protein LANA, indicating the establishment of latent KSHV persistent  
164 infection (Figure 1C). Importantly, we did not detect RFP expression in either infected cell lines  
165 indicating stable KSHV latency. To study KSHV oncogenesis in these cells, we performed  
166 tumorigenic analysis and found that KSHV-uninfected and KSHV-infected cell populations that  
167 were PDGFRA-positive or PDGFRA-negative did not form tumors when subcutaneously  
168 injected in nude mice (S1 Figure).



169           The cellular mechanisms promoting inflammation, wound repair and angiogenesis,  
170 may promote the development of KS tumors in KSHV-infected individuals. To test the effect of  
171 a pro-angiogenic KS-like environment on KSHV tumorigenesis, we infected mouse bone  
172 marrow-derived PDGFRA-positive (P $\alpha$ (+)S) and PDGFRA-negative (P $\alpha$ (-)S) MSCs with  
173 rKSHV.219. We then incubated the cells in KS-like media (K-P $\alpha$ (+)S KS), a media that is rich in  
174 heparin and endothelial cell growth factors (ECGF), which reproduces a pro-  
175 angiogenic/vasculogenic environment in the culture [41, 42]. The percentage of KSHV *de novo*  
176 infection was similar (80%) in both MSC and KS condition as well as in PDGFRA-negative and  
177 PDGFRA-positive cells (S2 Figure). After two weeks of puromycin selection, we obtained  
178 KSHV-infected PDGFRA-negative (K-P $\alpha$ (-)S KS) or PDGFRA-positive MSCs growing in KS-like  
179 media (K-P $\alpha$ (+)S KS). We compared KSHV gene expression in K-P $\alpha$ (-)S and K-P $\alpha$ (+)S growing  
180 in KS-like media with those maintained and selected in MSC media. Interestingly, we found  
181 upregulation of KSHV latent and lytic genes (LANA, RTA, vGPCR, and vIRF1) only in K-P $\alpha$ (+)S  
182 cells propagated in KS-like culture conditions (Figure 1D), indicating that this cell lineage and  
183 environmental conditions favor KSHV gene expression *in vitro*.

184

### 185 **KSHV infection is tumorigenic only in PDGFRA-positive MSCs (P $\alpha$ (+)S) grown in pro-** 186 **angiogenic KS-like environmental conditions**

187           Since we showed that pro-angiogenic KS-like culture conditions favor KSHV  
188 gene expression *in vitro* (Figure 1D) including many viral lytic oncogenes, we determined  
189 whether these conditions also conferred malignant cell characteristics to KSHV-infected  
190 P $\alpha$ (+)S MSCs, such as anchorage-independent cell growth, we performed a soft-agar colony

191 formation assay. Uninfected PDGFRA-positive MSCs cultured in KS-like media and KSHV-  
192 infected PDGFRA-positive MSCs cultured in MSC media did not grow on soft-agar (Figure 1E).  
193 In contrast, KSHV-infected PDGFRA-positive (P $\alpha$ (+)S) MSCs cultured in pro-angiogenic KS-like  
194 conditions (K-P $\alpha$ (+)S KS) were the only cells to form colonies in soft agar (Figure 1E),  
195 suggesting that the KS-like culture conditions conferred malignant phenotypic characteristics  
196 to K-P $\alpha$ (+)S MSCs. More importantly, subcutaneous injection of K-P $\alpha$ (+)S KS cells into nude  
197 mice resulted in tumor formation in all 6 injected mice by 7 weeks. No tumors formed from  
198 either uninfected P $\alpha$ (+)S MSC growing in KS-like culture conditions or in infected P $\alpha$ (+)S  
199 growing in MSC culture conditions (Figure 1F). Paraffin-embedded sections of KSHV-infected  
200 PDGFRA-positive MSCs tumors (K-P $\alpha$ (+)S KS tumor) stained with hematoxylin and eosin  
201 (H&E) were analyzed by a pathologist in a blind manner, confirming that these tumors were  
202 indistinguishable from the vascularized spindle cell sarcomas formed by mECK36 tumors  
203 previously generated by our lab, which were thoroughly characterized as KS-like tumors [26]  
204 (Figure 1G). Using immunofluorescence detection of the KSHV LANA protein, we confirmed  
205 that the majority of the tumor cells display the classic punctate nuclear staining (Figure 1H).  
206 Additionally, using the endothelial cell marker PECAM1, we observed that these tumors  
207 displayed phenotypic markers that corresponded to those typically found in human KS lesions  
208 (Figure 1I). We concluded that KSHV infection of PDGFRA-positive MSCs in combination with a  
209 pro-angiogenic KS-like environmental condition induces a malignant transformed phenotype  
210 in these cells, leading to tumorigenicity in nude mice.

211

212 **Upregulation of KSHV lytic gene expression during *in vivo* tumorigenesis**

213 We have previously shown that KSHV tumorigenesis in the mECK36 mouse KS-like  
214 model occurs with concomitant up-regulation of KSHV lytic genes and angiogenic  
215 ligands/receptors [14, 26]. This KSHV *in vivo* lytic switch is thus responsible for the activation of  
216 many autocrine and paracrine oncogenic signaling cascades, including the recently reported  
217 ligand-mediated activation of PDGFRA signaling pathway that drives KS tumorigenesis [14].  
218 RNA-sequencing (RNA-seq) analysis of KSHV gene expression in tumors derived from KSHV-  
219 infected PDGFRA-positive MSCs grown in KS-like media (K-P $\alpha$ (+)S KS tumors), which were  
220 found to be histologically indistinguishable from mECK36, also showed upregulation of KSHV  
221 lytic gene expression compared to the tumorigenic cells grown *in vitro* (KSHV *in vivo* lytic  
222 switch) (Figure 2A). We also compared the KSHV transcriptomes of our infected cells and  
223 tumors with those obtained from published RNA-seq analysis of actual Kaposi's Sarcoma  
224 human biopsies [43] from AIDS-KS patients (Figure 2B-C). As shown in Figure 2B, the  
225 unsupervised hierarchical clustering analysis show that human KS samples cluster between the  
226 lytic-expressing mouse KS-like tumors and the latently infected K-P $\alpha$ (+)S KS cells. This shows  
227 that the KSHV transcriptomes of MSCs grown in KS-like conditions are closer to those of actual  
228 human KS tumors than those grown in MSC conditions. They also show that the  
229 transcriptomes of the MSCs tumors are representative of some human KS samples as we  
230 previously reported for the mECK36 model [26]. In fact, some human KS samples showed  
231 upregulation of KSHV lytic genes when compared with the latently infected mouse MSCs  
232 grown in either MSC or KS-like conditions, further supporting the relevance of KSHV *in vivo*  
233 lytic gene expression observed in MSCs tumors (the *in vivo* lytic switch) to actual cases of  
234 human AIDS-KS. The upregulation of KSHV lytic genes in K-P $\alpha$ (+)S KS tumors correlated with

235 PDGFRA signaling activation (Figure 2D) and phospho-PDGFR $\alpha$  co-distributed with KSHV  
236 LANA (Figure 2E), further supporting our investigated link between KSHV and PDGFRA  
237 activation in these tumors [14]. Host gene RNA-seq comparison of KSHV-infected PDGFRA-  
238 positive cells grown in KS-like media (K-P $\alpha$ (+)S KS) to their corresponding tumors in nude mice  
239 revealed 1,861 differentially expressed genes (DEGs) (Figure 2F). The analysis of these DEGs  
240 using Gene Ontology (GO), Kyoto Encyclopedia of Genes and Genomes (KEGG) and Reactome  
241 databases, uncovered major changes in pathways involving glycolysis, respiratory electron  
242 transport, NOTCH signaling, TGF $\beta$  signaling and antigen processing and presentation among  
243 the most up-regulated pathways during KSHV *in vivo* lytic switch and tumorigenesis (Figure  
244 2G). The results from these bioinformatics assessments are consistent with prior biological  
245 studies on several KSHV lytic genes and lytic conversions upon environmental conditions [13].  
246 These data also agree with the predictions from the analysis of a human KS-signature and  
247 newer RNA-sequencing studies derived from differentially expressed genes between KS and  
248 normal skin, which predicted the activation of several paracrine axes by upregulation of  
249 receptors and/or their ligands [2] and changes in TGF $\beta$  signaling and glucose metabolism [43]  
250 similar to those observed in our MSC tumors.

251 **A de-repressed KSHV epigenome allows for expression of oncogenic KSHV genes in**  
252 **tumorigenic PDGFRA-positive MSCs growing in a KS-like environment**

253 To understand the differences in oncogenicity between KSHV-infected PDGFRA-  
254 positive MSCs grown in MSC versus KS-like media (K-P $\alpha$ (+)S KS versus K-P $\alpha$ (+)S MSC); we  
255 analyzed the pattern of KSHV viral gene expression using RNA-seq analysis (Figure 3A). The  
256 results from this analysis were in line with the qRT-PCR results depicted in figure 1D which

257 showed increased KSHV gene expression in cells grown in KS-like media (K-P $\alpha$ (+)S KS), and  
258 also revealed an overall increased expression of KSHV genes in these tumorigenic cells.  
259 Importantly, we verified that these differences in viral gene expression are not due to  
260 differences in viral DNA copy number (S<sub>3</sub> Figure). Many of these KSHV genes are well-  
261 characterized viral oncogenes such as vGPCR (ORF74), K12, vIRF1 (ORFK9), vFLIP (ORF71),  
262 K15. Our data suggest that PDGFRA-positive KSHV MSCs growing in a pro-angiogenic KS-like  
263 environment (K-P $\alpha$ (+)S KS) display a unique KSHV transcriptional profile that encompasses  
264 enhanced expression of oncogenic KSHV genes, without KSHV completing its full viral lytic  
265 cycle (abortive lytic state), which likely leads to KSHV-induced tumorigenicity.

266         Several studies indicate that histone modifications play a role in the epigenetic  
267 regulation of KSHV gene expression [44, 45]. Activating histone modifications like H<sub>3</sub>K<sub>4</sub>me<sub>3</sub>  
268 are enriched in some activated loci while repressive histone modifications like H<sub>3</sub>K<sub>27</sub>me<sub>3</sub> are  
269 widespread across the KSHV viral genome [46-48]. We determined if the differences in KSHV  
270 viral gene expression between non-tumorigenic K-P $\alpha$ (+)S MSC and tumorigenic K-P $\alpha$ (+)S KS  
271 cells could be attributed to differential epigenetic regulation at the viral promoters. We  
272 performed chromatin immunoprecipitation followed by next-generation sequencing (ChIP-  
273 seq) in three biological replicates to map the distribution of two histone modifications,  
274 H<sub>3</sub>K<sub>4</sub>me<sub>3</sub>, and H<sub>3</sub>K<sub>27</sub>me<sub>3</sub>, that are enriched at actively transcribed and repressed genes,  
275 respectively [49]. We found that KSHV chromatin contained both H<sub>3</sub>K<sub>4</sub>me<sub>3</sub> and H<sub>3</sub>K<sub>27</sub>me<sub>3</sub>  
276 marks; however, with distinct patterns of association at KSHV genomic regions between K-  
277 P $\alpha$ (+)S KS versus K-P $\alpha$ (+)S MSC cells (Figure 3A). As previously reported, the latency-  
278 associated locus where KSHV genes that are constitutively expressed during latency are

279 located, was enriched with H<sub>3</sub>K<sub>4</sub>me<sub>3</sub> in both K-Pα(+)<sub>S</sub> KS and K-Pα(+)<sub>S</sub> MSC cells (Figure 3A)  
280 [46, 48]. Interestingly, H<sub>3</sub>K<sub>27</sub>me<sub>3</sub> was widely distributed throughout the KSHV genome in  
281 both cells populations, but this repressive mark was more enriched in the KSHV genome in  
282 non-tumorigenic K-Pα(+)<sub>S</sub> MSC cells. This result correlates with the less KSHV gene expression  
283 observed in these cells by qRT-PCR and RNA-seq. On the other hand and in agreement with  
284 the KSHV gene expression upregulation seen in tumorigenic K-Pα(+)<sub>S</sub> KS cells, we observed  
285 more H<sub>3</sub>K<sub>4</sub>me<sub>3</sub> activating marks on the KSHV genome of these tumorigenic cells, especially in  
286 immediate early and early lytic genes (Figure 3A).

287 To delineate the characteristics of the chromatin structures associated with the  
288 regulatory regions of KSHV genes, we aligned the KSHV open reading frames (ORFs) relative  
289 to their translational start sites (TSS). We plotted the signal intensities of probes derived from  
290 the CHIP-Seq analysis across a 2 kb region spanning 1 kb on either side of the TSS (please  
291 see Materials and Methods for details) [46] (Figure 3B). Since RTA is responsible for the switch  
292 between latency and lytic replication, its promoter is not only tightly repressed during latency,  
293 but its silencing should also be rapidly reversible upon reactivation. We found that the RTA  
294 promoter is enriched in both H<sub>3</sub>K<sub>4</sub>me<sub>3</sub> and H<sub>3</sub>K<sub>27</sub>me<sub>3</sub> during latency (Figure 3 A-B),  
295 suggesting it possesses a bivalent chromatin that maintains repression of the RTA promoter  
296 while keeping it poised for rapid activation, in agreement with what was previously reported  
297 using BCLBC-1, TRExBCBL1-RTA and SLK cells [46, 47]. Moreover, in K-Pα(+)<sub>S</sub> KS cells the  
298 RTA promoter and other immediately early and early lytic promoters showed more activating  
299 marks than in K-Pα(+)<sub>S</sub> MSC cells. These results point to epigenetic regulation as a  
300 contributory mechanism for the unique KSHV transcriptional program shown by K-Pα(+)<sub>S</sub> KS

301 tumorigenic cells *in vitro* and support our MSC mouse model for studying the connection  
302 between epigenetic regulation of KSHV gene expression and oncogenesis.

303

304 **Global gene expression profiling and histone mark distribution in K-P $\alpha$ (+)S KS and K-**  
305 **P $\alpha$ (+)S MSC cells**

306 We showed that KSHV gene expression differences between non-tumorigenic K-P $\alpha$ (+)S  
307 MSC and tumorigenic K-P $\alpha$ (+)S KS cells are explained at least, in part, by differences in  
308 epigenetic regulation of the KSHV genome. In order to compare KSHV with host gene  
309 expression regulation in these two cell lines, we carried out a global gene expression profile by  
310 RNA-seq analysis. We found more than 450 differentially expressed host genes (DEGs)  
311 between tumorigenic K-P $\alpha$ (+)S KS and non-tumorigenic K-P $\alpha$ (+)S MSC cells (Figure 4A). These  
312 DEGs were enriched for multiple biological processes; notably, PDGFR signaling, PI3K-AKT and  
313 p53 signaling, together with cell cycle regulation (Figure 4B). Moreover, and as we showed for  
314 KSHV gene expression (Figures 3), H3K27me<sub>3</sub> and H3K4me<sub>3</sub> ChIP-seq revealed slightly more  
315 H3K4me<sub>3</sub> enrichment (Figure 4C) and fewer H3K27me<sub>3</sub> (Figure 4D) at the promoters of these  
316 upregulated genes in tumorigenic K-P $\alpha$ (+)S KS cells, further confirming epigenetic regulation  
317 of transcription at these loci.

318 Interestingly, Chip-seq analysis for the distribution of the two histone modifications,  
319 H3K4me<sub>3</sub> and H3K27me<sub>3</sub>, over the host genome revealed that K-P $\alpha$ (+)S MSC cells displayed  
320 more global enrichment of H3K27me<sub>3</sub> at host genes compared with K-P $\alpha$ (+)S KS cells,  
321 suggesting that the host genome of K-P $\alpha$ (+)S MSC cells is more transcriptionally repressed  
322 genome-wide (Figure 4E). To characterize these repressed genes, we associated H3K27me<sub>3</sub>

323   ChIP-seq peaks to all the genes of the mouse genome. We found that while the number of  
324   genes decorated with H<sub>3</sub>K<sub>27</sub>me<sub>3</sub> in the two K-Pα(+)<sub>S</sub> cells were comparable (9,696 in KSHV KS  
325   cells versus 9,371 in K-Pα(+)<sub>S</sub> MSC cells) with a large number of genes common between the  
326   two (8,158 genes decorated with H<sub>3</sub>K<sub>27</sub>me<sub>3</sub> in both), 1,538 genes were exclusive to K-Pα(+)<sub>S</sub>  
327   KS cells while 1,213 were exclusive to K-Pα(+)<sub>S</sub> MSC cells (Figure 4F). KEGG and REACTOME  
328   pathway enrichment analysis was performed for these repressed H<sub>3</sub>K<sub>27</sub>me<sub>3</sub> gene targets that  
329   are specific to K-Pα(+)<sub>S</sub> KS or K-Pα(+)<sub>S</sub> MSC. In K-Pα(+)<sub>S</sub> MSC cells the most repressed genes  
330   involved NOTCH<sub>1</sub> regulation, signaling by NOTCH<sub>1</sub> in Cancer, VEGFA-VEGFR<sub>2</sub> pathway,  
331   TGFB<sub>1/2</sub> KD mutants in cancer, VEGFR<sub>2</sub>-mediated cell proliferation, signaling by VEGF and  
332   p53 signaling pathways (Figure 4G). These aforementioned genes all related to KS and KSHV  
333   oncogenic signaling, which thus, appear more de-repressed in the oncogenic K-Pα(+)<sub>S</sub> KS cells.  
334   Interestingly, in the K-Pα(+)<sub>S</sub> KS cells, the most repressed genes involved Toll-Like Receptor 4  
335   cascade, Activated TLR<sub>4</sub> signaling, Toll-like receptor signaling pathway, ZBP<sub>1</sub>-mediated  
336   induction of type 1 IFNs and RIG-1/MDA<sub>5</sub> induction of IFN pathways, all related to the innate  
337   immune response (Figure 4G-H) and the Type I IFN (IFN $\alpha$  and  $\beta$ ) anti-viral response. This  
338   suggests that the IFN anti-viral response would be more repressed in KSHV-infected cells  
339   grown in a KS-like environment. In fact, K-Pα(+)<sub>S</sub> MSC cells showed higher expression of IFN $\beta$   
340   mRNA than K-Pα(+)<sub>S</sub> KS cells confirming the repression of the *IFN* $\beta$  loci in K-Pα(+)<sub>S</sub> KS cells  
341   (Figure 4I). Moreover, we found that only K-Pα(+)<sub>S</sub> MSC cells upregulated *IFN* $\beta$  expression  
342   after KSHV lytic reactivation with an HDAC inhibitor (SAHA/ Vorinostat) (Figure 4I). Taken  
343   together our RNA-seq and ChIP-seq analysis on host and KSHV genes indicates that  
344   tumorigenic K-Pα(+)<sub>S</sub> KS cells are more adapted to withstand oncogenic KSHV lytic gene



345 expression possibly by regulating PDGFR, PI3K-AKT, p53 and cell cycle pathways, but also by  
346 repressing innate immune response genes upon induction of the lytic replication program.

347

348 **A permissive epigenetic landscape induced by a pro-angiogenic environment**  
349 **promotes an oncogenic viral lytic-driven mechanism of tumorigenesis**

350 Our results suggest that KSHV and host epigenetic mechanisms which regulate KSHV  
351 lytic gene expression dictate at least, in part, the differences in tumorigenicity between cells  
352 grown in MSC and KS media. Figure 2A shows that K-P $\alpha$ (+)S KS tumorigenicity occurs along  
353 with a steep increase in KSHV lytic gene expression (KSHV *in vivo* lytic switch). In order to  
354 model the biological consequences of this tumorigenic lytic switch in K-P $\alpha$ (+)S KS and K-  
355 P $\alpha$ (+)S MSC cells in an *in vitro* system, we used HDAC inhibitors (HDACi) such as SAHA/  
356 Vorinostat which we and others have shown are powerful inducers of KSHV lytic replication in  
357 several systems [50-53]. We found that K-P $\alpha$ (+)S MSC cells, which are not tumorigenic,  
358 massively upregulated KSHV lytic genes (100-folds) after 24 hours of SAHA treatment, as  
359 shown using qRT-PCR (Figure 5A). In contrast, in tumorigenic K-P $\alpha$ (+)S KS cells that display a  
360 higher level of basal KSHV lytic gene expression, the fold-increase expression of KSHV lytic  
361 genes after reactivation was an order of magnitude lower than in K-P $\alpha$ (+)S MSC cells (Figure  
362 5A). We found that KSHV reactivation following SAHA treatment induces the appearance of a  
363 RFP (early lytic marker) positive cell population in both K-P $\alpha$ (+)S MSC (up to 10%) and K-  
364 P $\alpha$ (+)S KS (up to 3%) cells (Figure 5B). To characterize the pattern of KSHV gene expression in  
365 GFP-positive and RFP-positive cell populations generated after reactivation, we used  
366 fluorescence-activated cell sorting (FACS) to separate these two populations. We found that

367 the RFP positive populations of both K-P $\alpha$ (+)S MSC and K-P $\alpha$ (+)S KS cells (Figure 5C, left  
368 panel) showed massive upregulation of KSHV lytic and latent genes, when compared to un-  
369 induced cells, characteristic of lytic induction. The GFP-positive/RFP-negative population from  
370 the non-tumorigenic K-P $\alpha$ (+)S MSC cells also showed upregulation of both KSHV latent and  
371 lytic genes (LANA, vFLIP and vCyclin, RTA, vGCPR, K8.1) after SAHA treatment, suggesting  
372 KSHV lytic reactivation (Figure 5C, right panel) in this population as well. On the other hand,  
373 the GFP-positive/RFP-negative population from the tumorigenic K-P $\alpha$ (+)S KS cells showed  
374 only upregulation of some specific lytic genes (RTA and K8.1) (Figure 5C, right panel). Thus, the  
375 RFP-lytic marker distribution allowed us to identify a population of “classic” lytically induced  
376 cells that are similar in both K-P $\alpha$ (+)S MSC and K-P $\alpha$ (+)S KS cells. Interestingly, the GFP-  
377 positive/RFP-negative population, which corresponds to the vast majority of the cells, shows a  
378 distinct pattern of KSHV gene expression between K-P $\alpha$ (+)S MSC and K-P $\alpha$ (+)S KS cells after  
379 KSHV lytic reactivation. These results suggest that differences in the epigenetic environment  
380 induced by KS-like culture conditions can lead to a different outcome for lytic reactivation in K-  
381 P $\alpha$ (+)S KS cells and more importantly, be a key determinant for the oncogenic consequences  
382 of the KSHV lytic switch.

383 To determine if differences in the culture conditions can affect the proliferation of  
384 infected cells upon the lytic switch, we used an IncuCyte® Live-Cell Imaging and Analysis  
385 System, which enables real-time, automated cell proliferation assays to follow the growth of  
386 RFP-positive and GFP-positive populations among SAHA-induced cells. K-P $\alpha$ (+)S MSC and K-  
387 P $\alpha$ (+)S KS RFP-positive populations, which we found, do not differ in their pattern of KSHV  
388 induction (Figure 5D, left panel), augment in cell number upon lytic induction, then reach a

389 limit of cell growth. In contrast, in the case of GFP-positive cells, we found that the K-P $\alpha$ (+)S  
390 MSC cells stop proliferating after reactivation (Figure 5D, right panel), while induced K-P $\alpha$ (+)S  
391 KS cells continue to proliferate. Interestingly, Figure 5C shows that both cells display KSHV  
392 lytic gene expression, but only the tumorigenic K-P $\alpha$ (+)S KS cells are able to continue  
393 proliferating in spite of lytic KSHV gene expression. Moreover, K-P $\alpha$ (+)S KS cells showed more  
394 proliferation markers (such as Ki67) than K-P $\alpha$ (+)S MSC cells (Figure 5E) after 72hs of KSHV  
395 lytic reactivation.

396 Cell cycle arrest and cellular senescence are known to occur during the lytic replication  
397 phase of herpesviruses and other DNA viruses [54]. This type of senescence, characterized by  
398 the upregulation of cell cycle inhibitors such as p53 and p21, is generally also induced by  
399 aberrant proliferative signals of oncogenes such as activated Ras (RasV12) leading to increased  
400 oxidative DNA damage [55, 56]. The increase in expression of many oncogenic KSHV genes  
401 occurring during lytic replication could induce oncogenic stress that would typically be  
402 expected to trigger oncogene-induced senescence (OIS) [57, 58]. A widely used assay for cell  
403 senescence is the cytochemical detection of acidic  $\beta$ -galactosidase activity (pH 6.0), termed  
404 senescence-associated  $\beta$ -galactosidase (SA- $\beta$ -Gal) [59]. In order to fulfill all the hallmarks for  
405 establishing cell senescence [60, 61] we measured 1) Markers for Inhibition of the cell cycle and  
406 levels of cell cycle arrest proteins 2) Expression of acidic beta-galactosidase and 3)  
407 Upregulation of Senescence Associated Secretory Phenotype (SASP) and other senescence  
408 markers in K-P $\alpha$ (+)S MSC and K-P $\alpha$ (+)S KS cells after KSHV reactivation. As shown in Figure  
409 5E-H, K-P $\alpha$ (+)S MSC cells: 1) Displayed decreased levels of proliferation markers such as Ki67  
410 and expression of cyclin D1 2) Displayed enhanced features and markers of cell senescence,

411 such as increased SA- $\beta$ -Gal staining, and upregulation of SASP and senescence markers (IL-6,  
412 IGFBP2, PAI-1), 3) Expressed cell cycle inhibitors such p53 and p21 that correlated with their  
413 arrest of cellular proliferation and increase in the number of cells that underwent senescence.  
414 On the other hand, tumorigenic K-P $\alpha$ (+)S KS cells showed low SA- $\beta$ -Gal staining, lower levels  
415 of SASP and senescence markers, higher expression of Ki67 and upregulated cyclin D1, despite  
416 upregulation of p21 and p53 after lytic reactivation, which correlated with their increase in  
417 proliferation (Figure 5D-H). Importantly, K-P $\alpha$ (+)S MSC cells showed less DNA damage  
418 response (such as  $\gamma$ H2AX) (Figure 5I), compared to tumorigenic K-P $\alpha$ (+)S KS cells after KSHV  
419 reactivation. These tumorigenic cells display robust proliferation markers in spite of an  
420 increased level of DNA repair foci, further indicating that these cells are able to overcome  
421 KSHV-driven oncogene-induced senescence as well as DNA damage-induced cell cycle arrest,  
422 continuing to proliferate after KSHV reactivation.

423 In order to study the consequences of the *in vivo* KSHV lytic switch in more  
424 physiological conditions, we performed a short-term *in vivo* Matrigel-plug experiment with K-  
425 P $\alpha$ (+)S MSC and K-P $\alpha$ (+)S KS cells. Within the Matrigel-plug, the cells were subjected to *in vivo*  
426 growth conditions for a period of one week. We injected K-P $\alpha$ (+)S MSC and K-P $\alpha$ (+)S KS cells  
427 subcutaneously into Matrigel in nude mice, and after one week of *in vivo* growth, we analyzed  
428 the growth of viable cells by the GFP-expression using Spectrum In Vivo Imaging System  
429 (IVIS). We also extracted the Matrigel-plug containing cells to document the *in vivo* KSHV gene  
430 expression lytic switch by qRT-PCR. After one week of *in vivo* growth, K-P $\alpha$ (+)S KS cells  
431 continued proliferating, as shown by the GFP-positive signal at the site of injection, however,  
432 K-P $\alpha$ (+)S MSC cells were not able to proliferate *in vivo*, as seen by the lack of GFP signal (Figure

433 5J). Real time qRT-PCR analysis showed that both cell lines displayed upregulation of KSHV  
434 lytic genes (Figure 5K); yet, only tumorigenic K-P $\alpha$ (+)S KS cells were able to proliferate in the  
435 context of the KSHV *in vivo* lytic switch. On the other hand, the growth inhibition shown by K-  
436 P $\alpha$ (+)S MSC cells directly occurred together with the upregulation of KSHV gene expression *in*  
437 *vivo* (Figure 5K). The results obtained with this Matrigel-plug in *in vivo* experiments mimic  
438 those observed with KSHV lytic induction *in vitro* (Figure 5D). Taken together, these *in vitro*  
439 and *in vivo* results demonstrate that PDGFRA-positive KSHV-infected MSCs are able to  
440 proliferate *in vitro* and *in vivo* in the presence of KSHV oncogenic gene expression only when  
441 they are subjected to a pro-angiogenic KS-like environment. Thus, these conditions not only  
442 conferred an epigenetic adaptation leading to increased KSHV gene expression but also should  
443 confer a mechanism, which upon *in vivo* lytic switch, will allow them to overcome KSHV-driven  
444 oncogene-induced senescence and cell cycle arrest, leading to tumorigenesis.

445

446 **PDGFRA signaling allows KSHV-infected PDGFRA-positive MSCs grown in a KS-like**  
447 **environment to continue proliferating after lytic reactivation**

448 We sought to elucidate the mechanism that allows K-P $\alpha$ (+)S KS cells to continue  
449 proliferating after KSHV lytic reactivation. To test, in an unbiased manner, which tyrosine  
450 kinase receptors were differentially activated between K-P $\alpha$ (+)S MSC and K-P $\alpha$ (+)S KS cells  
451 after lytic reactivation, we used a tyrosine kinase proteomic array (Figure 6A). We found that  
452 PDGFRA was the most differentially activated tyrosine kinase over 39 RTKs tested in the array  
453 (Figure 6A). This finding was consistent with the pathway enrichment analysis shown in Figure  
454 4B, K-P $\alpha$ (+)S cells grown in KS-like media display enhanced expression of a genetic network

455 enriched in genes that regulate PDGFR signaling, AKT and cell cycle. To characterize the  
456 involvement of PDGFRA activation and downstream signaling pathways, we analyzed the cells  
457 after KSHV reactivation for PDGFRA and AKT signaling activation. K-P $\alpha$ (+)S KS cells showed  
458 activation of both PDGFRA and AKT signaling compared to K-P $\alpha$ (+)S MSC cells (Figure 6B).  
459 Moreover, we found that activation of PDGFRA signaling in induced K-P $\alpha$ (+)S KS cells  
460 correlated with upregulation of its ligands PDGFA and PDGFB (Figure 6C), further confirming  
461 the fact that KSHV lytic expression induces ligand-mediated activation of this oncogenic driver  
462 [14]. This KSHV-induced ligand-mediated activation of PDGFRA signaling could constitute an  
463 important mechanism mediating the adaptation of the K-P $\alpha$ (+)S KS cells to continue  
464 proliferating after lytic reactivation.

465

#### 466 **PDGFRA signaling is a critical pathway to overcome KSHV-driven oncogene-induced** 467 **senescence and for the proliferation of infected cells**

468 To test whether or not the PDGFRA activation, which is prominent in induced K-P $\alpha$ (+)S  
469 KS cells but not in K-P $\alpha$ (+)S MSC cells, is necessary for enabling cell proliferation upon KSHV  
470 lytic reactivation, we inhibited this pathway using a highly selective PDGFR tyrosine kinase  
471 inhibitor (PDGFR Tyrosine Kinase Inhibitor IV, IC<sub>50</sub>: PDGFR- $\alpha$ : IC<sub>50</sub> = 45 nM; PDGFR- $\beta$ : IC<sub>50</sub> =  
472 4.2 nM; c-Abl: IC<sub>50</sub> = 22 nM; c-Src: IC<sub>50</sub> = 185 nM; VEGFR: IC<sub>50</sub> = 3.1  $\mu$ M; bFGFR-1: IC<sub>50</sub> = 45.8  $\mu$ M;  
473 EGFR: IC<sub>50</sub> = >100  $\mu$ M). We found that in the presence of the PDGFR tyrosine kinase inhibitor  
474 K-P $\alpha$ (+)S KS cells were not able to continue proliferating upon lytic reactivation (Figure 6E).  
475 Importantly, the same concentration of inhibitor was unable to halt proliferation of K-P $\alpha$ (+)S  
476 KS cells that had not been lytically induced (Figure 6D). Moreover, upon lytic reactivation,

477 inhibition of PDGFRA activation correlated with decreased levels of the proliferation marker  
478 Ki67 (Figure 6F) and with increased levels of senescence, SA- $\beta$ -Gal staining (Figure 6G).  
479 Molecular analysis showed that the inhibition of PDGFRA signaling leads to a downregulation  
480 of Cyclin D1 and the PDGFRA ligands, PDGFA and PDGFB (Figure 6H). Taken together, our  
481 data indicate that activation of PDGFR signaling during KSHV lytic reactivation plays a role in  
482 allowing the proliferation of infected cells. These data, implicate this pathway as essential for  
483 overcoming KSHV-driven oncogene-induced senescence and for promoting KSHV-infected cell  
484 survival and proliferation, thus allowing KSHV tumorigenesis to progress.

485

486 **MSC culture conditions favor viral production in KSHV-infected human MSCs, while**  
487 **pro-angiogenic KS-like culture conditions are permissive for PDGFRA signaling-mediated**  
488 **proliferation of infected cells**

489 To validate our results of KSHV infection with murine MSCs in a relevant human  
490 infection system, we studied the effect of different culture conditions in KSHV-infected human  
491 MSCs that were shown to be bona-fide human cell targets of KSHV infection [35-38]. Bone  
492 marrow-derived Human MSCs were infected with rKSHV219 (K-hMSC) and subsequently  
493 cultured in either MSC media (K-hMSC MSC) or in KS-like pro-angiogenic conditions (K-hMSC  
494 KS). We monitored the ratios of latent to lytic KSHV infection by GFP and RFP expression using  
495 fluorescence microscopy as well as by quantifying the percentage of GFP versus RFP-positive  
496 cells by Flow Cytometry analysis (Figure 7A-C). We observed that in contrast to mouse MSCs  
497 and regardless of the culture conditions, infected human MSCs showed both KSHV latently  
498 and lytically infected cells (Figure 7A). K-hMSC growing in KS-like media displayed lower

499 percentages of RFP-positive cells than KSHV-infected hMSCs growing in MSC media (Figure  
500 7B-C). Since hMSCs have been shown to be permissive for KSHV productive replication [35],  
501 we quantified the production of infectious virions by infecting HEK AD-293 cells. We found that  
502 K-hMSCs grown in MSC media produced more virions than those grown in KS-like conditions  
503 (20% vs 5% of infected HEK AD-293) (Figure 7D). Quantification of KSHV DNA content in the  
504 supernatants of the cultures showed that K-hMSC MSC contained more KSHV genomes/mL  
505 than K-hMSC KS, which correlated with the higher infectious virions content of the  
506 supernatants (Figure 7E). Paradoxically, the KSHV pattern and levels of viral gene expression in  
507 K-hMSCs MSCs and KS were quite similar regardless of the culture conditions (Figure 7F),  
508 suggesting that these culture conditions may be affecting the efficiency of virions production.  
509 These results show that culture of K-hMSCs under different environmental conditions also can  
510 lead to different outcomes for KSHV lytic replication.

511         Since in K-hMSC, KSHV productive lytic replication was spontaneous, we decided to  
512 use this opportunity to compare the impact of KSHV lytic gene expression on the proliferation  
513 of K-hMSCs growing in different culture conditions without having to resort to drug-based or  
514 HDACi lytic reactivation. We used an IncuCyte® Live-Cell Imaging and Analysis System to  
515 follow the growth of RFP-positive and GFP-positive populations of K-hMSCs growing in MSC  
516 or KS-like media. As observed for murine MSCs, the RFP-positive population of both K-hMSC  
517 MSC and K-hMSC KS increased in numbers and reached a plateau of cell proliferation (Figure  
518 7G). Interestingly, as found in murine MSCs, the GFP-positive population of K-hMSC KS  
519 continue to proliferate over time (Figure 7H) while the GFP-positive population of K-hMSC  
520 MSC stopped proliferating shortly after KSHV infection (Figure 7H). We next sought to



521 determine if proliferation upon infection in KS-like media was a unique feature of PDGFRA  
522 expressing KSHV targets such as hMSCs. We choose low passage primary human lymphatic  
523 endothelial cells (hLECs) which are PDGFR-negative and were shown to be permissive for  
524 KSHV latent and lytic infection [13, 62, 63]. Interestingly, LECs showed less lytic infection in KS  
525 media than in their specific cell culture media, EGM2-MV, (Figure 7I and 7J bottom panels).  
526 Importantly, there were not able to continue proliferating after KSHV infection in any of the  
527 two cell culture media (Figure 7J, top panel).

528         Seeking a molecular explanation for the unique ability of K-hMSC growing in KS-like  
529 conditions to proliferate, and based on our results depicted in Figures 5 and 6 using mouse  
530 MSCs, we evaluated cyclin D1 expression and PDGFRA activation in human lymphatic  
531 endothelial cells and human mesenchymal stem cells infected with KSHV and exposed to the  
532 different media. As shown in Figure 7K, proliferating K-hMSC growing in KS media showed  
533 much higher levels of PDGFRA activation and Cyclin D1 expression than K-hMSC growing in  
534 MSC media. As expected, LECs showed low levels of expression of Cyclin D1 and no expression  
535 of PDGFRA after KSHV infection, which correlated with less cell proliferation. We employed  
536 VEGFR<sub>3</sub> as a specific lymphatic endothelial marker (Figure 7K). To determine whether the  
537 observed PDGFRA signaling activation was necessary for enabling cell proliferation of K-hMSC  
538 KS, we measured proliferation of K-hMSC MSC and K-hMSC KS in the presence or absence of a  
539 PDGFR tyrosine kinase inhibitor (PDGFR Tyrosine Kinase Inhibitor IV). We found that in both  
540 KSHV-infected hMSCs grown in presence of the inhibitor, PDGFRA signaling was abolished  
541 and the proliferation was inhibited shortly after infection (Figure 7L-M). This pattern of  
542 proliferation is reminiscent of K-hMSCs MSC, which were not substantially affected by the

543 PDGFR inhibitor. These results illustrate that, as shown for mouse MSCs, the outcome for  
544 KSHV infection of human cells is strongly determined by the cell type and the culture  
545 conditions. While lymphatic endothelial cells, in EGM2-MV and KS media, and mesenchymal  
546 stem cells in MSC culture conditions favor viral production and do not proliferate,  
547 mesenchymal stem cells infected in KS-like culture conditions are more permissive for  
548 enabling PDGFRA-mediated proliferation of productively infected hMSC cultures.

549

## 550 **DISCUSSION**

551 Human virally induced cancers are mainly characterized by long incubation periods and  
552 the fact that the majority of infected individuals do not develop cancer. This is due to the need  
553 for specific host conditions and factors that are necessary to enable a full viral-mediated  
554 transformation [1]. The KS spindle-cell progenitor and specific host conditions of KSHV-driven  
555 oncogenesis upon *de novo* infection are poorly understood. We identified PDGFRA(+)/SCA-1(+)  
556 bone marrow-derived mesenchymal stem cells (P $\alpha$ (+)S MSCs) as KS spindle-cell progenitors  
557 and found that pro-angiogenic environmental conditions typical of KS, inflammation and  
558 wound healing are critical for KSHV sarcomagenesis. This is because growth in KS-like  
559 conditions generates a de-repressed KSHV epigenome allowing oncogenic KSHV gene  
560 expression in infected P $\alpha$ (+)S MSCs. Furthermore, these growth conditions allow KSHV-  
561 infected P $\alpha$ (+)S MSCs to overcome KSHV-driven oncogene-induced senescence and cell cycle  
562 arrest via a PDGFRA-signaling mechanism; thus identifying PDGFRA not only as a phenotypic  
563 determinant for KS-progenitors but also as a critical enabler for viral oncogenesis (Figure 8).

564 AIDS-KS lesions are characterized by proliferating KSHV-infected spindle cells,  
565 however, the origin of the spindle cells (SCs) remains enigmatic because they express markers  
566 of multiple cellular lineages, including endothelial, monocytic, and smooth muscle [6]. Initial  
567 immunohistochemistry studies showed that KS SCs are poorly differentiated cells showing  
568 phenotypic markers such as VEGFRs that suggest an endothelial origin, however, KSHV-  
569 infected primary endothelial cells in culture do not outgrow their uninfected counterparts, lose  
570 their KSHV genomes after extended passage in tissue culture, do not grow in soft agar and do  
571 not form tumors in nude mice [64]. On the other hand telomerase-immortalized human  
572 endothelial cell line infected with KSHV can become transformed and tumorigenic [24, 25].  
573 Prior studies have suggested the role of mesenchymal stem cells (MSCs) as KSHV target and  
574 KS progenitors [28, 34-38]. In fact several KS models made from primary bone marrow-  
575 derived mouse endothelial lineage/adherent cells [26, 27] and one from rat MSCs [28] formed  
576 tumors in a KSHV-dependent manner, suggesting that these populations contain cell types in  
577 which KSHV infection is oncogenic. Sarcomas are cancers of mesenchymal origin [31], with  
578 Platelet-derived growth factor receptor (PDGFR) signaling playing a significant part in  
579 mesenchymal biology, including mesenchymal stem cell differentiation, growth, and  
580 angiogenesis [30]. Moreover, our recent studies showing that PDGFRA signaling is an  
581 oncogenic driver in KSHV sarcomagenesis and that it is consistently found in AIDS-KS tissue  
582 samples in its activated form [14], point to a bone marrow-derived PDGFRA(+) MSCs such as  
583 the P $\alpha$ (+)S MSCs, which our study now show is a cell progenitor target of KSHV-driven  
584 sarcomagenesis.

585 Clinical observations, such as the appearance of KS tumors in surgical scars or sites of  
586 trauma (*Koebner* phenomenon)[65], suggest that cellular mechanisms such as inflammation,  
587 wound repair and angiogenesis are necessary to promote KS tumorigenesis. We found that  
588 P $\alpha$ (+)S MSCs, which are recruited to sites of injury and inflammation [66], are highly  
589 permissive to KSHV infection. More importantly, we found that this infection is only oncogenic  
590 when it occurs in the context of a pro-angiogenic KS-like environment. These conditions favor  
591 enhanced KSHV lytic gene expression in KSHV-infected P $\alpha$ (+)S MSCs conferring malignant cell  
592 characteristics and tumorigenicity in nude mice (Figure 8). We previously found that  
593 KSHVBac36 is angiogenic and tumorigenic in an endothelial cell lineage of adherent bone  
594 marrow cell preparations [26], which prompted us to 'target' putative progenitors among this  
595 transfected heterogeneous cell population. Our present study identified the KS progenitor cell  
596 type in the bone marrow as the P $\alpha$ (+)S MSCs, and demonstrated the need for pro-angiogenic  
597 KS-like culture conditions for oncogenic viral gene expression and tumorigenesis (Figure 8).

598 To reproduce pro-angiogenic KS-like culture conditions we added to the cell culture  
599 media crude preparations of endothelial cell growth factors (ECGF) [41, 42] together with  
600 heparin, which was shown to potentiates the mitogenic activity of ECGF [67]. The main active  
601 component of these crude extracts of ECGF is basic fibroblast growth factor (bFGF), which is a  
602 very strong mitogen for endothelial cells in culture and an angiogenic growth factor [68, 69].  
603 Several lines of evidence suggest that KS is an angiogenic and inflammatory cytokine-  
604 mediated driven disease; at least in early stages, and that angiogenic factors and; in particular,  
605 bFGF, play a role in lesion development [70, 71]. Basic FGF is highly expressed at the RNA and  
606 protein level by cultured AIDS-KS cells and in spindle cells from AIDS-KS and classic KS tissue

607 [72, 73]. Moreover, *in vitro* studies have shown that a cooperation between PDGFB and bFGF is  
608 responsible of inducing the expression of PDGFRA and FGFR1/2, promoting proliferation of  
609 P $\alpha$ (+)S MSCs without altering their multipotency or inducing their differentiation [74]. Our  
610 results point to the importance of these ECGFs as part of an angiogenic environment  
611 promoting enhanced oncogenic KSHV gene expression leading to KSHV oncogenesis.

612 Tumors that arise from K-P $\alpha$ (+)S KS cells have an increased expression of KSHV  
613 oncogenes (KSHV *in vivo* lytic switch), paralleling our previous findings in the mouse KS-like  
614 mECK36 model [26], and also displayed PDGFRA signaling activation that co-distributed with  
615 KSHV LANA, thus supporting the described link between KSHV and PDGFRA activation in the  
616 tumors [14]. The pattern of KSHV expression in K-P $\alpha$ (+)S KS cells-derived tumors show an  
617 increase in lytic transcripts *in vivo* [26]. The importance of the “*in vivo*” microenvironment on  
618 affecting the KSHV expression profile was previously reported in PEL and KS [24, 75].  
619 Although it is assumed that most spindle cells in KS lesions are latently infected [76], KSHV  
620 lytic gene expression was also reported for a portion of KS lesions [43, 77, 78]. The RNA-  
621 sequencing analysis for KSHV gene expression of recently reported samples [43] shown in of  
622 Figure 2B, indicates that some human KS biopsies also express lytic transcripts as found in our  
623 mouse KSHV model, further supporting the relevance of KSHV *in vivo* lytic gene expression  
624 observed in MSCs tumors (the *in vivo* lytic switch) to actual cases of human AIDS-KS. We  
625 propose that the fact that tumorigenic K-P $\alpha$ (+)S KS cells showed enhanced expression of  
626 KSHV lytic genes while they are able to growth *in vivo*, together with the results showing  
627 proliferation of productively KSHV-infected human MSC cultures of Figure 7, provides a

628 powerful model for the initial steps of KSHV oncogenesis showing a definitive oncogenic role  
629 of KSHV lytic gene expression in KS pathogenesis.

630 The bioinformatics-based analysis using RNA sequencing of the mouse KS-like K-  
631 P $\alpha$ (+)S tumors revealed glycolysis, NOTCH signaling and TGFB signaling among the most  
632 upregulated pathways during the KSHV *in vivo* lytic switch, pointing ,therefore, to these  
633 pathways as important drivers of KSHV tumorigenesis *in vivo*. Indeed, many of these host  
634 signaling cascades that are co-opted by KSHV, including PI<sub>3</sub>K/AKT/mTOR, NF $\kappa$ B and Notch,  
635 are critical for cell-specific mechanisms of transformation [1, 3, 79, 80]. Importantly, recent  
636 RNA sequencing data of KS transcriptomes compared to KS lesions show KSHV-mediated  
637 global transcriptional reprogramming that, similarly to our MSC tumors, included upregulation  
638 of the transforming growth factor-beta 1 (TGFB1) signaling pathway and glucose metabolism  
639 disorders [43].

640 The different KSHV transcriptional programs shown by K-P $\alpha$ (+)S cells were determined  
641 by whether the culture conditions where the infected cells were grown was either those for  
642 MSC pluripotent growth or pro-angiogenic KS-like media. A similar pattern of differences in  
643 the KSHV transcriptional program was shown for KSHV-infected lymphatic endothelial cells  
644 (LECs) compared to KSHV-infected blood endothelial cells (BECs) [63]. Moreover, we showed  
645 that multiple biological processes were enriched among the differential expressed host genes  
646 (DEGs) between K-P $\alpha$ (+)S MSC and K-P $\alpha$ (+)S KS cells, indicating that KS-like culture  
647 conditions which favored the transcription of KSHV lytic genes correlated with the expression  
648 of oncogenic host-gene networks. Patterns of KSHV and host gene expression in K-P $\alpha$ (+)S  
649 MSC versus K-P $\alpha$ (+)S KS cells could be explained by differences in the epigenetic regulation

650 determined by the different culture conditions. Here, we confirm that there were less  
651 repressive histone marks and more activating histone marks (H3K27me3-H3K4me3) on  
652 different portions of the KSHV genome in K-P $\alpha$ (+)S KS than in K-P $\alpha$ (+)S MSC cells, that  
653 correlated with increase KSHV gene expression by these tumorigenic cells (Figure 8). Pathway  
654 analysis of host genes enriched with H3K27me3 in non-tumorigenic K-P $\alpha$ (+)S MSC showed that  
655 the most repressed genes were all related to KS and KSHV oncogenic signaling, further  
656 indicating that distinct environments where KSHV infection occurs can lead to different host  
657 epigenetic landscape, thus prompting oncogenesis. In the K-P $\alpha$ (+)S KS cells, the most  
658 repressed pathways were linked to innate immunity, this could favor the ability of these cells to  
659 continue growing in the presence of increased levels of KSHV gene expression while promoting  
660 lower levels of expression of innate immune genes upon lytic reactivation. This indicates that  
661 tumorigenic K-P $\alpha$ (+)S KS cells are more adapted to withstand oncogenic KSHV lytic gene  
662 expression possibly by upregulating oncogenic pathways, but also by repressing innate  
663 immune response genes upon induction of the lytic replication program (Figure 8).

664 A possible mechanism of oncogenicity in K-P $\alpha$ (+)S KS cells is that these pro-angiogenic  
665 growth conditions promote a de-repressed KSHV epigenome, which during the *in vivo* KSHV  
666 lytic switch, allow for expression of oncogenic KSHV genes leading to tumorigenesis. We found  
667 that, as shown for other infected murine cells [81] neither viral DNA replication nor virus  
668 production was seen after KSHV reactivation with HDACi in K-P $\alpha$ (+)S MSC and K-P $\alpha$ (+)S KS  
669 cells, further indicating an abortive lytic state after reactivation characteristic of KSHV  
670 infection of murine cells. Moreover, K-P $\alpha$ (+)S MSC cells stopped proliferating after KSHV lytic  
671 reactivation *in vitro* and *in vivo* in Matrigel-plugs. Interestingly, tumorigenic K-P $\alpha$ (+)S KS were

672 able to continue proliferating after KSHV lytic reactivation and after KSHV *in vivo* lytic switch in  
673 Matrigel-plugs, in spite of enhanced KSHV oncogene expression. Evidence has accumulated of  
674 senescence as a contributor of tumor suppression and as a host defense mechanism in limiting  
675 the effects of oncogenic viruses [56, 82]. We found increased senescence markers (SA- $\beta$ -Gal  
676 positive cells, upregulation of SASP and senescence markers, increase p21 expression and  
677 decrease Ki67 expression) in non-proliferating K-P $\alpha$ (+)S MSC after KSHV lytic reactivation,  
678 indicating that this inhibitory mechanism could explain the arrest in proliferation and the lack  
679 of tumor formation of these cells. In contrast, tumorigenic K-P $\alpha$ (+)S KS cells are able to  
680 proliferate in spite of p21 upregulation and enhanced KSHV lytic gene expression (Figure 8).  
681 Early steps of KSHV tumorigenesis involve activation of the DNA damage checkpoints that  
682 lead to selective pressure for mutations which abrogate checkpoints, thus providing an  
683 advantage for cells with defective DNA damage response components to propagate [57].  
684 Accordingly, tumorigenic K-P $\alpha$ (+)S KS cells are able to proliferate in the presence of DNA  
685 damage ( $\gamma$ H2AX) after KSHV reactivation. Thus, these conditions not only conferred an  
686 epigenetic adaptation leading to increased KSHV gene expression but also to a mechanism,  
687 which upon *in vivo* lytic switch, would allow cells to overcome KSHV-driven oncogene-induced  
688 senescence and cell cycle arrest, prompting tumorigenesis (Figure 8).

689 We sought to understand the mechanisms that, after KSHV lytic reactivation, allow K-  
690 P $\alpha$ (+)S KS cells to continue growing while induced senescence of K-P $\alpha$ (+)S MSC cells. An RTK  
691 array showed that PDGFRA was the most activated kinase in K-P $\alpha$ (+)S KS compared to K-  
692 P $\alpha$ (+)S MSC. Furthermore, the fact that K-P $\alpha$ (+)S MSC display a series of RTKs that are more  
693 activated than K-P $\alpha$ (+)S KS (ErbB2, ErbB3), further indicates the unique role of PDGFRA



694 activation compared to activation of other RTK cascades in promoting proliferation in the  
695 context of KSHV lytic gene expression. We have recently shown that KSHV usurps  
696 sarcomagenic PDGFRA signaling to drive KS through upregulation of PDGFs ligands by KSHV  
697 lytic genes [14]. After KSHV reactivation, only K-P $\alpha$ (+)S KS cells showed PDGFRA activation  
698 that correlated with an upregulation of PDGFA and PDGFB expression. This KSHV-induced  
699 ligand-mediated activation of PDGFRA signaling may constitute an important mechanism  
700 mediating the adaptation of the K-P $\alpha$ (+)S KS cells to continue proliferating despite KSHV lytic  
701 gene expression.

702 We found that K-P $\alpha$ (+)S KS cells treated with PDGFR tyrosine kinase inhibitor lost their  
703 ability to continue proliferating upon KSHV lytic reactivation while showing increased levels of  
704 senescence markers. Thus, the PDGFRA signaling pathway is essential to promote KSHV-  
705 infected cell survival and proliferation allowing KSHV tumorigenesis to progress, further  
706 validating this oncogenic pathway as a therapeutic target for early stages of KS tumorigenesis  
707 (Figure 8). One approach that has been explored for the treatment of KSHV tumorigenesis is  
708 the stimulation of lytic reactivation in the presence of antiviral drugs. We have previously  
709 shown that this was effective in blocking PEL growth in mouse xenograft models [50] by the  
710 combination of proteasome plus HDAC inhibitors. Hereby we propose that the combination of  
711 HDAC plus PDGFR inhibitors should also constitute a plausible therapeutic approach.

712 It has been reported that human MSCs supported active viral lytic replication at the  
713 acute infection stage with low proliferation rates [35]. We observed that KSHV-infected bone  
714 marrow-derived human MSCs (K-hMSCs) grown in MSC media produced infectious virions,  
715 and in accordance, stop proliferating shortly after infection. However, when maintained in KS-

716 like pro-angiogenic environment, these KSHV-infected hMSCs proliferated at high rates even  
717 though they showed active viral lytic replication, which correlated with higher levels of Cyclin  
718 D1 expression and PDGFRA activation. In addition, when K-hMSCs were grown in the presence  
719 of the PDGFR inhibitor IV to abrogate PDGFRA signaling, their proliferation was abolished  
720 shortly after KSHV infection. These results illustrate that, as shown for mouse MSCs, the  
721 outcome for KSHV infection of bone marrow-derived human MSCs is strongly determined by  
722 the culture conditions. While MSC culture conditions favor viral production, KS-like culture  
723 conditions are more permissive for enabling PDGFRA-mediated proliferation of productively  
724 infected hMSC cultures.

725         Several prior studies have pointed to the role of Mesenchymal Stem Cells (MSCs) and  
726 Lymphatic Endothelial Cells (LECs) as KSHV targets and KS progenitors [13, 17, 28, 34-38].  
727 These studies propose that Kaposi sarcoma spindle cells can arise from either KSHV-infected  
728 MSCs through a mesenchymal to endothelial transition (MEndT) or from KSHV-infected LECs  
729 through an endothelial to mesenchymal transition (EndMT) [83]. We showed that after KSHV  
730 de novo infection of MSCs and LECs, all cells were lytically infected but only MSCs growing in  
731 KS-like environment were able to proliferate. The results of Figure 7 suggest a double role for  
732 these cells in KSHV pathobiology: pluripotent MSCs may play a role in supporting KSHV  
733 infection/ dissemination, while the same cells in a pro-angiogenic KS-like environment might  
734 be key precursors in KSHV sarcomagenesis. Regarding the proposed role of LECs as KS-  
735 progenitors; infected LECs have been shown to undergo EndMT when growing in “in vivo” -like  
736 conditions such as 3D spheroids and activation of notch signaling [13]. It then becomes  
737 plausible that an infected LEC could be also a KS progenitor through a first stage involving

738 EndMT to become a mesenchymal PDGFR-positive KS-precursor that may undergo  
739 sarcomagenesis in an angiogenic KS-like environment. Our results point to PDGFRA as both  
740 the key pathogenesis driving receptor and the defining marker of the phenotype of an  
741 uninfected circulating KS progenitor (PDGFRA-positive bone marrow-derived MSCs),  
742 therefore intervening through the different steps of KSHV oncogenesis. PDGFs are the most  
743 powerful MSC chemo-attractant [84] and are expressed in KSHV-infected cells in KS lesions  
744 [14, 85, 86]. We propose that a pro-angiogenic KS-like environment rich in secreted lytic  
745 infection-driven growth factors, like PDGF, can recruit circulating P $\alpha$ (+)S-derived MSCs KS  
746 progenitors infected with KSHV and lead to tumorigenesis driven by KSHV oncogenic gene  
747 expression.

748 In summary, we designed a novel model of “de novo” KSHV oncogenesis based on  
749 infection of PDGFRA-positive mesenchymal stem cell progenitors cultured in pro-  
750 angiogenic/vasculogenic KS-like growth conditions. This system serves as a unique and robust  
751 platform to identify KSHV oncogenic-pathways and their relationship with cellular lineages  
752 and extracellular growth environments. Additionally, it can further be exploited to genetically  
753 dissect and elucidate viral, host-cell and environmental features of KS pathobiology.

754

755

756

757

758

759

760

761

762

763

764

765

## 766 **MATERIALS AND METHODS**

### 767 **Cell Culture**

768           Mouse mesenchymal stem cells (MSCs) were harvested and characterized as described  
769 previously [39]. MSCs were grown in 20% FBS (Atlanta Biologicals), 1% (vol/vol) penicillin and  
770 streptomycin, and  $\alpha$ MEM (Invitrogen). MSCs were characterized by (i) adherence to plastic, (ii)  
771 negative for hematopoietic cell surface markers CD34 and CD45 and positive for CD105,  
772 CD90.2, CD73, and stem cell antigen SCA-1; and (iii) the ability to differentiate into adipocytes  
773 or osteoblast-like cells. Human MSCs were isolated as described previously [39]. Briefly, BM  
774 aspirates (25–50 mL) were purchased from AllCells (Emeryville, CA) under appropriate  
775 informed consent and institutional review board approval. The experiments were performed  
776 using MSCs at passages 8–15 for murine cells and passages 4–7 for human MSCs. Human

777 lymphatic endothelial cells (LECs) were purchased from ScienceCell (catalog # 2500), used at  
778 passages 2-4, cultured in fibronectin-coated culture vessels ( $2\mu\text{g}/\text{cm}^2$ ) and grown in EGM2-MV  
779 medium from Lonza (catalog # CC-3202).

## 780 **Animal Studies**

781 All mice were housed under pathogen-free conditions. Tumor studies were done in 4-  
782 to 6-week-old nude mice obtained from the National Cancer Institute. Tumors were generated  
783 by subcutaneous injection of MSC PDGFRA+ve KSHV KS cells ( $2 \times 10^5$  cells) as previously  
784 described [26]. Tumor volumes were measured using a caliper every 2 days and calculated  
785 using the following formula:  $[\text{length (mm)} \times \text{width (mm)}^2 \times 0.52]$ [87].

## 786 **Generation and maintenance of mouse PDGFRA-positive MSCs grown in MSC or KS-like** 787 **media**

788 The isolated mouse MSC cells were infected with rKSHV.219, MOI of 3, in the presence  
789 of polybrene ( $8\mu\text{g}/\text{ml}$ ) for 1 hour. 2 days later, puromycin was added to the culture to select  
790 and expand the infected cells. All murine cells were cultured in MEM alpha media:  
791 supplemented with 20% heat inactivated fetal bovine serum (FBS) (MSC media); or KS-like  
792 growth medium (KS media): DMEM supplemented with 30% FBS (Gemini Bioproducts), 0.2  
793 mg/ml Endothelial Cell Growth Factor (ECGF) (Sigma-Aldrich) or (ReliaTech), 0.2 mg/ml  
794 Endothelial Cell Growth Supplement (ECGS) (Sigma-Aldrich), 1.2 mg/ml heparin (Sigma-  
795 Aldrich), insulin/transferrin/selenium (Invitrogen), 1% penicillin-streptomycin (Invitrogen), and  
796 BME vitamin (VWR Scientific).

## 797 **VIRUS PREPARATION AND INFECTION**

798 iSLK-219 cells harboring recombinant KSHV 219 were used for virus preparation.  
799 Briefly, infectious viruses of the 219 strain were induced from the respective iSLK cells by  
800 treatment with doxycycline and sodium butyrate for 4 days. The culture supernatants were  
801 filtered through a 0.45- $\mu$ m filter and centrifuged at 25,000 rpm for 2 h. The pellet was re-  
802 suspended in phosphate-buffered saline (PBS), aliquot, and stored at  $-70^{\circ}\text{C}$  as infectious KSHV  
803 preparations. Virus infection was performed according to the method used in a previous study,  
804 with minor modifications. Mouse MSCs, Human MSCs and human LECs were seeded at  $6 \times$   
805  $10^4$  cells per well in 6-well culture plates. After a day of culture, the culture medium was then  
806 removed and cells were washed once with PBS. The prepared KSHV inoculum, MOI of 3 for  
807 mouse MSCs and MOI of 8 human MSCs and LECs, and 8  $\mu\text{g}/\text{ml}$  of Polybrene were mixed and  
808 added to the cultured cells. After centrifugation at  $700 \times g$  for 60 minutes, the inoculum was  
809 removed after 3 hour and 2 ml of culture medium was added to each well. For titration of  
810 infectious virions, HEK AD-293 cells seeded in 12 wells for 24 hours were infected with 1 ml of  
811 supernatants. At 72 hours post-infection, the GFP-positive cells were counted by Flow  
812 Cytometry.

## 813 **DETECTION AND QUANTIFICATION OF VIRION DNA**

814 After 96 hours, post-infection, viral loads (KSHV DNA copy numbers) were determined  
815 by real-time quantitative PCR of cell-free supernatants (virions). Cell-free supernatants were  
816 also collected and used for *de novo* infection of AD293 cells in the presence of 5  $\mu\text{g}/\text{ul}$   
817 Polybrene.

## 818 Reagents

819 Antibodies: Histone H3K27Ac (cat. #4353), Histone H3 (cat. #4499), AKT, and p-AKT  
820 (cat. #4060), Ki67 (cat. #9129) and  $\gamma$ H2AX (cat. #9718) were purchased from Cell Signaling  
821 Technology (Danvers, MA); p21 (cat. #ab109199) and LANA (cat. #ab4103) from Abcam  
822 (Cambridge, MA), PDGFA (cat. #sc-9974), PDGFB (cat. #sc-365805), Cyclin D1 (cat. #sc-718),  
823 FLT4/VEGFR3 (cat. #sc321) and p53 (cat. #sc-6243) from Santa Cruz Biotechnology; Actin (cat.  
824 #A5441) from Sigma; and p-PDGFR $\alpha$  (Y742) (cat. #AF2114) and total PDGFR $\alpha$  (cat. #AF-307)  
825 from R&D Systems (Minneapolis, MN). Anti-CD31 (PECAM1) (cat. #550274) from BD  
826 Biosciences. PDGFR tyrosine kinase inhibitor IV (cat. # sc-205794) was purchased from Santa  
827 Cruz Biotechnology.

828

## 829 Matrigel-plug

830 We re-suspended  $2 \times 10^6$  of K-P $\alpha$ (+)S MSC or K-P $\alpha$ (+)S KS cells in 500  $\mu$ L phenol red-  
831 free Matrigel (BD Bioscience, cat. # 356235). The mixture was implanted subcutaneously into  
832 the back of 7 weeks old male NUDE mice (n =3 in each group) following the BD Bioscience  
833 protocol. Two implants were injected per mouse. As a negative control, we injected only  
834 Matrigel (n = 3). After 1 week, the mice were euthanized, and the Matrigel plugs were  
835 removed.

## 836 Whole-animal fluorescent imaging

837           Injected mice were analyzed with IVIS spectrum whole live-animal imaging system  
838 (Perkin Elmer Inc., Waltham, MA, USA). Mice were anesthetized with isoflurane using a  
839 vaporizer, and a fluorescence image was obtained using GFP filter set (excitation wavelength,  
840 488 nm; emission wavelength, 510 nm).

#### 841 **Flow Cytometry**

842           For analysis of PDGFRA expression, cells were diluted in FACS buffer of PBS containing  
843 2% FBS and 1 mM EDTA. APC-conjugated anti-PDGFRA antibody (eBioscience, cat. # 17-1401-  
844 81), PE-conjugated anti-Sca-1 antibody (eBioscience, cat. #12-5981-81), or the isotype control  
845 were diluted in FACS buffer at 1:200, and added to the cells for 30 min incubation at 4°C. Cells  
846 were then washed twice in cold PBS and fixed with 4% paraformaldehyde. All flow cytometry  
847 analysis was performed on a Becton-Dickinson LSR analyzer (BDBiosciences) and analyzed  
848 using FlowJo (Tree Star, Inc.) software.

#### 849 **RNA-Sequencing analysis**

850 RNA was isolated and purified using the RNeasy mini kit (Qiagen). RNA concentration and  
851 integrity were measured on an Agilent 2100 Bioanalyzer (Agilent Technologies). Only RNA  
852 samples with RNA integrity values (RIN) over 8.0 were considered for subsequent analysis.  
853 mRNA from cell lines and tumor samples were processed for directional mRNA-seq library  
854 construction using the Preparation Kit according to the manufacturer's protocol. We  
855 performed paired-end sequencing using an Illumina NextSeq500 platform. The short-read  
856 sequences were mapped to the mouse reference genome (GRCm38.82) by the splice junction  
857 aligner TopHat V2.1.0. We employed several R/Bioconductor packages to accurately calculate



858 the gene expression abundance at the whole-genome level using the aligned records (BAM  
859 files) and to identify differentially expressed genes between cell lines and cell lines and tumors.  
860 Briefly, the number of reads mapped to each gene based on the TxDb. Mmusculus gene  
861 ensembles were counted, reported and annotated using the Rsamtools, GenomicFeatures,  
862 GenomicAlignments packages. To identify differentially expressed genes between cell lines  
863 and tumor samples, we utilized the DESeq2 test based on the normalized number of counts  
864 mapped to each gene. Functional enrichment analyses were performed using the ClueGo  
865 Cytoscape's plug-in (<http://www.cytoscape.org/>) and the InnateDB resource  
866 (<http://www.innatedb.com/>) based on the list of deregulated transcripts between K-P $\alpha$ (+)S KS  
867 cells and K-P $\alpha$ (+)S MSC cells (p-value<0.01; FC> $\pm$ 1.5) and between K-P $\alpha$ (+)S KS tumors *in vivo*  
868 and K-P $\alpha$ (+)S KS cells *in vitro* (p-value <0.001; FC> $\pm$ 2). Data integration and visualization of  
869 differentially expressed transcripts were done with R/Bioconductor. KSHV transcriptome was  
870 analyzed using previous resources and KSHV 2.0 reference genome [88], while edgeR test was  
871 employed for differential gene expression analysis of KSHV transcripts. Kaposi's sarcoma  
872 KSHV RNA-seq profiles were retrieved from GEO database (GSE100684) from a previous study  
873 [43] and integrated with mouse derived samples for further analysis.

874 Functional enrichment analyses were performed using the ClueGo Cytoscape's plug-in  
875 (<http://www.cytoscape.org/>) and the InnateDB resource (<http://www.innatedb.com/>) based on  
876 the list of deregulated transcripts between K-P $\alpha$ (+)S KS cells and K-P $\alpha$ (+)S MSC cells (p-  
877 value<0.01; FC> $\pm$ 1.5) and between K-P $\alpha$ (+)S KS tumors *in vivo* and K-P $\alpha$ (+)S KS cells *in vitro* (p-  
878 value <0.001; FC> $\pm$ 2). Data integration and visualization of differentially expressed transcripts  
879 were done with R/Bioconductor.

880

## 881 **Chromatin immunoprecipitation (ChIP)**

882 To reduce the effect of technical variation and sample processing bias, we utilized  
883 recently described quantitative ChIP (qChIP) sequence technology. For normalization  
884 strategies, we obtained *Drosophila melanogaster* chromatin (Spike-in Chromatin) and  
885 *Drosophila*-specific histone variant, H2Av antibody (spike-in antibody) from Active Motif (cat.  
886 # 61686 and cat. # 53083). The ChIP protocol used previously was modified [48] (to perform  
887 the qChIP). In brief, for each ChIP, chromatin prepared from 10 million cells was mixed with 50  
888 ng Spike-in chromatin. This was precleared using IgG for 2 hours before being mixed with 2 µg  
889 spike-in antibody and 4 µg antibody specific for the epitope of interest. The antibodies used  
890 were H3K4me3 (Abcam, cat. #ab8580), H3K27me2/3 mAb (Active Motif, cat. # 39535), control  
891 rabbit IgG (Santa Cruz Biotechnology, cat. #sc-2027). The antibody-chromatin mixture was  
892 incubated at 4°C overnight in a cold room. Next day, 20 µl protein A/G magnetic beads (Pierce,  
893 cat. # 88802) were washed, blocked with PBS 1% BSA, added to the chromatin-antibody  
894 complex, and incubated at 4°C for 2 hours. The supernatant was removed by placing the sample  
895 on a magnet. The beads were washed 4X with LiCl wash buffer and 1X with TE buffer. The DNA  
896 was eluted from the immune complex bound on beads by incubating the beads at 65°C in  
897 freshly prepared 100 µl SDS elution buffer for two hours. Another elution step was performed  
898 by incubating the beads in 50 µl elution buffer. The two portions of eluted DNA were combined  
899 (150 µl) and DNA was finally purified using NEB Monarch PCR and DNA cleanup kit (cat.

900 #T1030S). The DNA was finally eluted in 60  $\mu$ l 0.1X TE. 1  $\mu$ l of eluted DNA was utilized for  
901 ChIP-seq library preparation.

## 902 **ChIP-seq library preparation**

903 The NEB Next Ultra II DNA Library Prep Kit for Illumina (cat. # E7645L) was used for  
904 preparing libraries with the manufacturer's protocol and associated reagents. 50  $\mu$ l eluted ChIP  
905 DNA for each sample was mixed with 3  $\mu$ l of end prep enzyme mix and 7  $\mu$ l end prep reaction  
906 buffer. The end prep was carried out by incubating the reaction for 30 min at 20C and 30 min at  
907 65C in a thermocycler. The above reaction was mixed with 2.5  $\mu$ l of 1:25 dilution of Illumina  
908 adapter, and ligated using 60  $\mu$ l ligation master mix and ligation enhancer by incubating the  
909 reaction at 20C for 15 min. 3  $\mu$ l of USER enzyme was added to carry out the reaction at 37C for  
910 15 min. Libraries were purified to remove unligated adaptors using AMPure XP beads. The PCR  
911 amplification of purified adaptor-ligated fragments was performed using Q5 DNA Master mix  
912 supplied in the kit. In total 16 libraries were generated and were multiplexed using NEB  
913 Multiplex Oligo sets for Illumina. The libraries were pooled in two lanes of Illumina and were  
914 sequenced on Illumina HiSeq using 2\*150 run at the University of Florida ICBR facility.

915

## 916 **KSHV ChIP-Seq analysis**

917 The adapter sequences were trimmed from the reads using Trimmomatic [89] and the  
918 quality of the trimmed reads was checked with FastQC. Reads were aligned to the KSHV  
919 genome (GenBank accession number: GQ994935.1) [90] using Bowtie2 in paired-end mode

920 [91]. Duplicates were removed with Picard, after which peaks were called using MACS2 [92].  
921 The peaks were scaled with respect to KSHV episome copy number and *Drosophila* (fly) spike-  
922 in reads. To do the normalization, first, the data was normalized to the number of episomes.  
923 To obtain the scaling factor, the number of episomes in the MSC input was divided by the  
924 number of episomes in the KS input and the MSC input. This gave the KS samples a scaling  
925 factor of approx. 1.8 and the MEM samples a scaling factor of 1. Next, the fly scaling factor was  
926 determined. This was done with the following equation for all samples:  $1/(\text{number of fly}$   
927  $\text{reads}/1000000)$ . The ratio of KSHV reads to fly reads was determined by dividing KSHV reads  
928 by fly reads. Much like step one, the episome and fly scaling factor was determined by dividing  
929 the MSC input KSHV/fly ratio by the KS and MSC KSHV/fly ratios. Finally, the spike in episome  
930 count was determined by multiplying the fly scaling factor and the KSHV/fly ratio. The data  
931 were visualized using IGV.

932 To generate the heat maps, promoter regions were defined as 1 kb upstream and downstream  
933 of the translational start sites (TSS). The TSSs were determined using ORF start positions and  
934 `annotatePeaks.pl` from Homer (v4.7), which resulted in an expression matrix. The rows display  
935 the histone modification patterns along the -1 kb to +1 kb genomic regions relative to the  
936 translational start site (TSS) of each viral gene, which we assigned as the gene regulatory  
937 regions. The 1 kb regions were divided into twenty 50 bp fragments and genes were separated  
938 into IE, E, L, and latent gene classes. The resulting matrix was log transformed and row  
939 centered before using Pearson correlation and pairwise complete-linkage hierarchical  
940 clustering with Cluster 3.0. Clustered matrices were then visualized using Java TreeView  
941 (version 1.1.6r4) where rows show the log<sub>2</sub> average peak derived from the average of the

942 biological replicates of the CHIP-Seq experiments. Blue and yellow colors represent the lower-  
943 than-average and higher-than-average expression, respectively.

944

#### 945 **Host gene CHIP-Seq analysis**

946           CHIP-seq reads were analyzed following the AQUAS CHIP-seq bioinformatics pipeline  
947 using default parameters (Kundaje lab, [https://github.com/kundajelab/chipseq\\_pipeline](https://github.com/kundajelab/chipseq_pipeline)).  
948 Briefly, FASTQ reads were aligned to the mouse mm9 genome using BWA vo.7.13 and  
949 duplicate reads were removed using Picard tools v1.126. Peaks and signal tracks were  
950 generated using MACS2.1 and filtered for blacklist regions identified by ENCODE. Bedtools  
951 v2.26.0 intersect was used to determine peak overlaps with RefSeq genes +2.5kb upstream of  
952 TSS regions to identify H3K27me3 and H3K4me3 enriched genes. NGS Plot v2.61 was used to  
953 generate density plots.

#### 954 **Soft agar assay**

955           Base agar was made by combining melted 1% agar with KS-like medium or MSC  
956 medium to give a 0.5% Agar/1X KS-like or MSC medium solution. 1.5 mL was added to each  
957 well of a 6 well plate and allowed to set. Five thousand cells were plated on top of base agar in  
958 0.7% agar/2X KS-like or MSC medium in triplicate in 6-well plates. The cells were fed every 3  
959 days with 1 mL of Ks-like or MSC medium. Colonies were photographed at 4 weeks. Only  
960 colonies larger than the mean size of the background colonies in the negative control wells  
961 were considered.

## 962 **Real-Time Quantitative PCR (RT-qPCR)**

963 RNA was isolated with RNeasy Plus Kit (QIAGEN, Valencia, CA) with on columns DNase  
964 treatment. 500 ng of RNA was transcribed into cDNA using Reverse Transcription System  
965 (Promega, Madison, WI) according to the manufacturer's instructions. RT-qPCR was  
966 performed using an ABI Prism 7000 Sequence Detection System (Applied Biosystems) with  
967 SybrGreen PCR Master Mix (Quanta Biosciences). In every run, melting curve analysis was  
968 performed to verify the specificity of products as well as water and –RT controls. Data were  
969 analyzed using the  $\Delta\Delta CT$  method as previously described [26]. Target gene expression was  
970 normalized to GAPDH by taking the difference between CT values for target genes and  
971 GAPDH ( $\Delta CT$  value). These values were then calibrated to the control sample to give the  $\Delta\Delta CT$   
972 value. The fold target gene expression is given by the formula:  $2^{-\Delta\Delta CT}$ .

## 973 **Cell proliferation assay (Incucyte)**

974 Cells were plated in 6-well plates at 60,000 cells/well in 3 replicates. Cells were  
975 incubated in an Incucyte Zoom (Essen Bioscience), acquiring green and red fluorescence  
976 images at 10x every 2 hours. The Incucyte Zoom software was used to analyze and graph the  
977 results.

## 978 **Immunofluorescence Staining**

979 Immunofluorescence assay (IFA) was performed as previously described [26]. Briefly,  
980 paraffin-embedded tissue sections were deparaffinized and rehydrated following antigen  
981 retrieval treatment. Cells were fixed in 4% paraformaldehyde for 10 min and washed with PBS.

982 Tumor section and cells were permeabilized in 0.2% Triton-X/PBS for 20 min at 4°C. After  
983 blocking with 3% of BSA in PBS and 0.1% Tween 20 for 60 min, samples were incubated with  
984 Primary antibodies overnight at 4°C. After PBS washing, samples were incubated with  
985 fluorescent secondary antibodies for 1 hour (Molecular Probes), washed and mounted with  
986 ProLong Gold antifade reagent with DAPI (Molecular Probes). Images were taken using a Zeiss  
987 ApoTome Axiovert 200M microscope.

### 988 **Western Blotting**

989 Protein concentrations in cell and tumor lysates were quantified using the DC Protein  
990 Assay (Bio-Rad,). 20 µg of proteins were mixed with Laemmli buffer, boiled for 5 min, resolved  
991 by SDS-PAGE and transferred to PVDF membranes (Bio-Rad Laboratories). Membranes were  
992 blocked with 3% BSA for 1 hour and incubated with primary antibodies (4°C, 16 hours). After 3  
993 TBS/T washes, membranes were incubated with HRP-labeled secondary antibodies (Promega)  
994 for 1 hour at room temperature. Protein bands were developed using ECL Plus Detection  
995 Reagents (GE Healthcare). To analyze multiple proteins on the same membrane, membranes  
996 were washed with Restore PLUS Western Blot Stripping Buffer (Thermo Scientific) according  
997 to the manufacturer's protocol.

### 998 **Phospho-Receptor Tyrosine Kinase (RTK) Array**

999 R&D Systems' Mouse Phospho-Receptor Tyrosine Kinase (RTK) Array Kit (Catalog #  
1000 ARY014) was used to detect levels of phosphorylation of 39 RTKs in K-Pα(+)-MSC or K-Pα(+)-S  
1001 KS cells.

1002

## 1003 **QUANTIFICATION AND STATISTICAL ANALYSIS**

### 1004 **Statistical Analysis**

1005           Statistical significance of the data was determined using two-tailed Student's t-test and  
1006 2way ANOVA for multiple comparisons. A p-value lower than 0.05 was considered significant.  
1007 Statistical analysis was performed using GraphPad Prism 7. All values were expressed as means  
1008  $\pm$  standard deviation.

### 1009 **Ethics Statement**

1010           The animal experiments have been performed under UM IACUC approval number 16-  
1011 093. The University of Miami has an Animal Welfare Assurance on file with the Office of  
1012 Laboratory Animal Welfare (OLAW), National Institutes of Health. Additionally, UM is  
1013 registered with USDA APHIS. The Council on Accreditation of the Association for Assessment  
1014 and Accreditation of Laboratory Animal Care (AAALAC International) has continued the  
1015 University of Miami's full accreditation.

### 1016 **ACKNOWLEDGMENTS**

1017           We would like to thank, Darlah Lopez Rodriguez and Vytas Dargis-Robinson for their  
1018 technical support. The Oncogenomics Core Facility at the Sylvester Comprehensive Cancer  
1019 Center for performing high-throughput sequencing and the Flow Cytometry Core Facility for  
1020 assistance with Flow Cytometry and cell sorting analysis. Lucas J. Boatwright and UF ICBR for



1021 sequencing and bioinformatics support. We would like to thank Dr. Priyamvada Rai, from the  
1022 department of Medicine at the University of Miami for usefull advice.

1023

1024

1025

1026

1027

1028

1029

1030

1031

1032

1033

1034

1035

1036

1037

1038

1039

1040

1041 **REFERENCES**

- 1042 1. Mesri EA, Feitelson MA, Munger K. Human viral oncogenesis: a cancer hallmarks analysis. *Cell*  
1043 *Host Microbe*. 2014;15(3):266-82. doi: 10.1016/j.chom.2014.02.011. PubMed PMID: 24629334; PubMed  
1044 Central PMCID: PMC3992243.
- 1045 2. Mesri EA, Cesarman E, Boshoff C. Kaposi's sarcoma and its associated herpesvirus. *Nat Rev*  
1046 *Cancer*. 2010;10(10):707-19. doi: 10.1038/nrc2888. PubMed PMID: 20865011; PubMed Central PMCID:  
1047 PMC4721662.
- 1048 3. Dittmer DP, Damania B. Kaposi sarcoma-associated herpesvirus: immunobiology, oncogenesis,  
1049 and therapy. *J Clin Invest*. 2016;126(9):3165-75. doi: 10.1172/JCI84418. PubMed PMID: 27584730;  
1050 PubMed Central PMCID: PMCPMC5004954.
- 1051 4. Cesarman E, Damania B, Krown SE, Martin J, Bower M, Whitby D. Kaposi sarcoma. *Nat Rev Dis*  
1052 *Primers*. 2019;5(1):9. doi: 10.1038/s41572-019-0060-9. PubMed PMID: 30705286.
- 1053 5. Ganem D. KSHV and the pathogenesis of Kaposi sarcoma: listening to human biology and  
1054 medicine. *J Clin Invest*. 2010;120(4):939-49. doi: 10.1172/JCI40567. PubMed PMID: 20364091; PubMed  
1055 Central PMCID: PMC2847423.
- 1056 6. Cavallin LE, Goldschmidt-Clermont P, Mesri EA. Molecular and cellular mechanisms of KSHV  
1057 oncogenesis of Kaposi's sarcoma associated with HIV/AIDS. *PLoS Pathog*. 2014;10(7):e1004154. doi:  
1058 10.1371/journal.ppat.1004154. PubMed PMID: 25010730; PubMed Central PMCID: PMC4092131.
- 1059 7. Krown SE. Therapy of AIDS-associated Kaposi's sarcoma: targeting pathogenetic mechanisms.  
1060 *Hematol Oncol Clin North Am*. 2003;17(3):763-83. PubMed PMID: 12852655.
- 1061 8. Nguyen HQ, Magaret AS, Kitahata MM, Van Rompaey SE, Wald A, Casper C. Persistent Kaposi  
1062 sarcoma in the era of highly active antiretroviral therapy: characterizing the predictors of clinical  
1063 response. *AIDS*. 2008;22(8):937-45. doi: 10.1097/QAD.0b013e3282ff6275. PubMed PMID: 18453853;  
1064 PubMed Central PMCID: PMC2730951.
- 1065 9. Labo N, Miley W, Benson CA, Campbell TB, Whitby D. Epidemiology of Kaposi's sarcoma-  
1066 associated herpesvirus in HIV-1-infected US persons in the era of combination antiretroviral therapy.  
1067 *AIDS*. 2015;29(10):1217-25. doi: 10.1097/QAD.0000000000000682. PubMed PMID: 26035321.
- 1068 10. Maurer T, Ponte M, Leslie K. HIV-associated Kaposi's sarcoma with a high CD4 count and a low  
1069 viral load. *N Engl J Med*. 2007;357(13):1352-3. doi: 10.1056/NEJMc070508. PubMed PMID: 17898112.
- 1070 11. Hong YK, Foreman K, Shin JW, Hirakawa S, Curry CL, Sage DR, et al. Lymphatic reprogramming of  
1071 blood vascular endothelium by Kaposi sarcoma-associated herpesvirus. *Nature genetics*.  
1072 2004;36(7):683-5. doi: 10.1038/ng1383. PubMed PMID: 15220917.
- 1073 12. Wang HW, Trotter MW, Lagos D, Bourboulia D, Henderson S, Makinen T, et al. Kaposi sarcoma  
1074 herpesvirus-induced cellular reprogramming contributes to the lymphatic endothelial gene expression in  
1075 Kaposi sarcoma. *Nature genetics*. 2004;36(7):687-93. doi: 10.1038/ng1384. PubMed PMID: 15220918.
- 1076 13. Cheng F, Pekkonen P, Laurinavicius S, Sugiyama N, Henderson S, Gunther T, et al. KSHV-initiated  
1077 notch activation leads to membrane-type-1 matrix metalloproteinase-dependent lymphatic endothelial-  
1078 to-mesenchymal transition. *Cell Host Microbe*. 2011;10(6):577-90. doi: 10.1016/j.chom.2011.10.011.  
1079 PubMed PMID: 22177562.
- 1080 14. Cavallin LE, Ma Q, Naipauer J, Gupta S, Kurian M, Locatelli P, et al. KSHV-induced ligand  
1081 mediated activation of PDGF receptor-alpha drives Kaposi's sarcomagenesis. *PLoS Pathog*.  
1082 2018;14(7):e1007175. doi: 10.1371/journal.ppat.1007175. PubMed PMID: 29985958.
- 1083 15. Ojala PM, Schulz TF. Manipulation of endothelial cells by KSHV: implications for angiogenesis  
1084 and aberrant vascular differentiation. *Semin Cancer Biol*. 2014;26:69-77. doi:  
1085 10.1016/j.semcancer.2014.01.008. PubMed PMID: 24486643.
- 1086 16. Della Bella S, Taddeo A, Calabro ML, Brambilla L, Bellinvia M, Bergamo E, et al. Peripheral blood  
1087 endothelial progenitors as potential reservoirs of Kaposi's sarcoma-associated herpesvirus. *PloS one*.  
1088 2008;3(1):e1520. doi: 10.1371/journal.pone.0001520. PubMed PMID: 18231605; PubMed Central  
1089 PMCID: PMC2204065.

- 1090 17. Cancian L, Hansen A, Boshoff C. Cellular origin of Kaposi's sarcoma and Kaposi's sarcoma-  
1091 associated herpesvirus-induced cell reprogramming. *Trends in cell biology*. 2013;23(9):421-32. doi:  
1092 10.1016/j.tcb.2013.04.001. PubMed PMID: 23685018.
- 1093 18. Mesri EA. Inflammatory reactivation and angiogenicity of Kaposi's sarcoma-associated  
1094 herpesvirus/HHV8: a missing link in the pathogenesis of acquired immunodeficiency syndrome-  
1095 associated Kaposi's sarcoma. *Blood*. 1999;93(12):4031-3. PubMed PMID: 10361099.
- 1096 19. Browning PJ, Sechler JM, Kaplan M, Washington RH, Gendelman R, Yarchoan R, et al.  
1097 Identification and culture of Kaposi's sarcoma-like spindle cells from the peripheral blood of human  
1098 immunodeficiency virus-1-infected individuals and normal controls. *Blood*. 1994;84(8):2711-20. PubMed  
1099 PMID: 7522639.
- 1100 20. Monini P, Colombini S, Sturzl M, Goletti D, Cafaro A, Sgadari C, et al. Reactivation and  
1101 persistence of human herpesvirus-8 infection in B cells and monocytes by Th-1 cytokines increased in  
1102 Kaposi's sarcoma. *Blood*. 1999;93(12):4044-58. PubMed PMID: 10361101.
- 1103 21. Bais C, Santomaso B, Coso O, Arvanitakis L, Raaka EG, Gutkind JS, et al. G-protein-coupled  
1104 receptor of Kaposi's sarcoma-associated herpesvirus is a viral oncogene and angiogenesis activator.  
1105 *Nature*. 1998;391(6662):86-9. doi: 10.1038/34193. PubMed PMID: 9422510.
- 1106 22. Cesarman E, Mesri EA, Gershengorn MC. Viral G protein-coupled receptor and Kaposi's sarcoma:  
1107 a model of paracrine neoplasia? *The Journal of experimental medicine*. 2000;191(3):417-22. PubMed  
1108 PMID: 10662787.
- 1109 23. Montaner S, Sodhi A, Ramsdell AK, Martin D, Hu J, Sawai ET, et al. The Kaposi's sarcoma-  
1110 associated herpesvirus G protein-coupled receptor as a therapeutic target for the treatment of Kaposi's  
1111 sarcoma. *Cancer research*. 2006;66(1):168-74. PubMed PMID: 16397229.
- 1112 24. An FQ, Folarin HM, Compitello N, Roth J, Gerson SL, McCrae KR, et al. Long-term-infected  
1113 telomerase-immortalized endothelial cells: a model for Kaposi's sarcoma-associated herpesvirus latency  
1114 in vitro and in vivo. *Journal of virology*. 2006;80(10):4833-46. doi: 10.1128/JVI.80.10.4833-4846.2006.  
1115 PubMed PMID: 16641275; PubMed Central PMCID: PMC1472065.
- 1116 25. Roy D, Sin SH, Lucas A, Venkataramanan R, Wang L, Eason A, et al. mTOR inhibitors block Kaposi  
1117 sarcoma growth by inhibiting essential autocrine growth factors and tumor angiogenesis. *Cancer Res*.  
1118 2013;73(7):2235-46. doi: 10.1158/0008-5472.CAN-12-1851. PubMed PMID: 23382046; PubMed Central  
1119 PMCID: PMC3618543.
- 1120 26. Mutlu AD, Cavallin LE, Vincent L, Chiozzini C, Eroles P, Duran EM, et al. In vivo-restricted and  
1121 reversible malignancy induced by human herpesvirus-8 KSHV: a cell and animal model of virally induced  
1122 Kaposi's sarcoma. *Cancer Cell*. 2007;11(3):245-58. doi: 10.1016/j.ccr.2007.01.015. PubMed PMID:  
1123 17349582; PubMed Central PMCID: PMC2180156.
- 1124 27. Ashlock BM, Ma Q, Issac B, Mesri EA. Productively infected murine Kaposi's sarcoma-like tumors  
1125 define new animal models for studying and targeting KSHV oncogenesis and replication. *PLoS One*.  
1126 2014;9(1):e87324. doi: 10.1371/journal.pone.0087324. PubMed PMID: 24489895; PubMed Central  
1127 PMCID: PMC3905023.
- 1128 28. Jones T, Ye F, Bedolla R, Huang Y, Meng J, Qian L, et al. Direct and efficient cellular  
1129 transformation of primary rat mesenchymal precursor cells by KSHV. *J Clin Invest*. 2012;122(3):1076-81.  
1130 doi: 10.1172/JCI58530. PubMed PMID: 22293176; PubMed Central PMCID: PMC3287217.
- 1131 29. Koon HB, Krown SE, Lee JY, Honda K, Rapisuwon S, Wang Z, et al. Phase II trial of imatinib in  
1132 AIDS-associated Kaposi's sarcoma: AIDS Malignancy Consortium Protocol 042. *J Clin Oncol*.  
1133 2014;32(5):402-8. doi: 10.1200/JCO.2012.48.6365. PubMed PMID: 24378417; PubMed Central PMCID:  
1134 PMC3912327.
- 1135 30. Morikawa S, Mabuchi Y, Kubota Y, Nagai Y, Niibe K, Hiratsu E, et al. Prospective identification,  
1136 isolation, and systemic transplantation of multipotent mesenchymal stem cells in murine bone marrow.

- 1137 J Exp Med. 2009;206(11):2483-96. doi: 10.1084/jem.20091046. PubMed PMID: 19841085; PubMed  
1138 Central PMCID: PMCPMC2768869.
- 1139 31. Rodriguez R, Rubio R, Menendez P. Modeling sarcomagenesis using multipotent mesenchymal  
1140 stem cells. Cell Res. 2012;22(1):62-77. doi: 10.1038/cr.2011.157. PubMed PMID: 21931359; PubMed  
1141 Central PMCID: PMCPMC3351912.
- 1142 32. Corless CL, Barnett CM, Heinrich MC. Gastrointestinal stromal tumours: origin and molecular  
1143 oncology. Nat Rev Cancer. 2011;11(12):865-78. doi: 10.1038/nrc3143. PubMed PMID: 22089421.
- 1144 33. Ho AL, Vasudeva SD, Lae M, Saito T, Barbashina V, Antonescu CR, et al. PDGF receptor alpha is  
1145 an alternative mediator of rapamycin-induced Akt activation: implications for combination targeted  
1146 therapy of synovial sarcoma. Cancer Res. 2012;72(17):4515-25. doi: 10.1158/0008-5472.CAN-12-1319.  
1147 PubMed PMID: 22787122; PubMed Central PMCID: PMCPMC3432680.
- 1148 34. Gurzu S, Ciortea D, Munteanu T, Kezdi-Zaharia I, Jung I. Mesenchymal-to-endothelial transition  
1149 in Kaposi sarcoma: a histogenetic hypothesis based on a case series and literature review. PLoS One.  
1150 2013;8(8):e71530. doi: 10.1371/journal.pone.0071530. PubMed PMID: 23936513; PubMed Central  
1151 PMCID: PMCPMC3735554.
- 1152 35. Lee MS, Yuan H, Jeon H, Zhu Y, Yoo S, Shi S, et al. Human Mesenchymal Stem Cells of Diverse  
1153 Origins Support Persistent Infection with Kaposi's Sarcoma-Associated Herpesvirus and Manifest Distinct  
1154 Angiogenic, Invasive, and Transforming Phenotypes. MBio. 2016;7(1):e02109-15. Epub 2016/01/28. doi:  
1155 10.1128/mBio.02109-15. PubMed PMID: 26814175; PubMed Central PMCID: PMCPMC4742711.
- 1156 36. Li Y, Zhong C, Liu D, Yu W, Chen W, Wang Y, et al. Evidence for Kaposi's Sarcoma originating from  
1157 Mesenchymal Stem Cell through KSHV-induced Mesenchymal-to-Endothelial Transition. Cancer Res.  
1158 2017. doi: 10.1158/0008-5472.CAN-17-1961. PubMed PMID: 29066510.
- 1159 37. Parsons CH, Szomju B, Kedes DH. Susceptibility of human fetal mesenchymal stem cells to  
1160 Kaposi sarcoma-associated herpesvirus. Blood. 2004;104(9):2736-8. doi: 10.1182/blood-2004-02-0693.  
1161 PubMed PMID: 15238422; PubMed Central PMCID: PMCPMC2739377.
- 1162 38. Yoo SM, Jang J, Yoo C, Lee MS. Kaposi's sarcoma-associated herpesvirus infection of human  
1163 bone-marrow-derived mesenchymal stem cells and their angiogenic potential. Arch Virol.  
1164 2014;159(9):2377-86. doi: 10.1007/s00705-014-2094-3. PubMed PMID: 24777829.
- 1165 39. Gomes SA, Rangel EB, Premer C, Dulce RA, Cao Y, Florea V, et al. S-nitrosoglutathione reductase  
1166 (GSNOR) enhances vasculogenesis by mesenchymal stem cells. Proc Natl Acad Sci U S A.  
1167 2013;110(8):2834-9. doi: 10.1073/pnas.1220185110. PubMed PMID: 23288904; PubMed Central PMCID:  
1168 PMCPMC3581904.
- 1169 40. Vieira J, O'Hearn PM. Use of the red fluorescent protein as a marker of Kaposi's sarcoma-  
1170 associated herpesvirus lytic gene expression. Virology. 2004;325(2):225-40. doi:  
1171 10.1016/j.virol.2004.03.049. PubMed PMID: 15246263.
- 1172 41. Burgess WH, Mehlman T, Marshak DR, Fraser BA, Maciag T. Structural evidence that endothelial  
1173 cell growth factor beta is the precursor of both endothelial cell growth factor alpha and acidic fibroblast  
1174 growth factor. Proc Natl Acad Sci U S A. 1986;83(19):7216-20. PubMed PMID: 3532107; PubMed Central  
1175 PMCID: PMCPMC386686.
- 1176 42. Maciag T, Hoover GA, Weinstein R. High and low molecular weight forms of endothelial cell  
1177 growth factor. J Biol Chem. 1982;257(10):5333-6. PubMed PMID: 7068593.
- 1178 43. Tso FY, Kossenkov AV, Lidenge SJ, Ngalamika O, Ngowi JR, Mwaiselage J, et al. RNA-Seq of  
1179 Kaposi's sarcoma reveals alterations in glucose and lipid metabolism. PLoS Pathog.  
1180 2018;14(1):e1006844. doi: 10.1371/journal.ppat.1006844. PubMed PMID: 29352292; PubMed Central  
1181 PMCID: PMCPMC5792027.
- 1182 44. Chen J, Ueda K, Sakakibara S, Okuno T, Parravicini C, Corbellino M, et al. Activation of latent  
1183 Kaposi's sarcoma-associated herpesvirus by demethylation of the promoter of the lytic transactivator.

- 1184 Proc Natl Acad Sci U S A. 2001;98(7):4119-24. doi: 10.1073/pnas.051004198. PubMed PMID: 11274437;  
1185 PubMed Central PMCID: PMCPMC31189.
- 1186 45. Lu F, Zhou J, Wiedmer A, Madden K, Yuan Y, Lieberman PM. Chromatin remodeling of the  
1187 Kaposi's sarcoma-associated herpesvirus ORF50 promoter correlates with reactivation from latency. *J*  
1188 *Virool.* 2003;77(21):11425-35. PubMed PMID: 14557628; PubMed Central PMCID: PMCPMC229253.
- 1189 46. Toth Z, Maglinte DT, Lee SH, Lee HR, Wong LY, Brulois KF, et al. Epigenetic analysis of KSHV  
1190 latent and lytic genomes. *PLoS Pathog.* 2010;6(7):e1001013. doi: 10.1371/journal.ppat.1001013.  
1191 PubMed PMID: 20661424; PubMed Central PMCID: PMCPMC2908616.
- 1192 47. Gunther T, Grundhoff A. The epigenetic landscape of latent Kaposi sarcoma-associated  
1193 herpesvirus genomes. *PLoS Pathog.* 2010;6(6):e1000935. doi: 10.1371/journal.ppat.1000935. PubMed  
1194 PMID: 20532208; PubMed Central PMCID: PMCPMC2880564.
- 1195 48. Hu J, Yang Y, Turner PC, Jain V, McIntyre LM, Renne R. LANA binds to multiple active viral and  
1196 cellular promoters and associates with the H3K4methyltransferase hSET1 complex. *PLoS Pathog.*  
1197 2014;10(7):e1004240. doi: 10.1371/journal.ppat.1004240. PubMed PMID: 25033463; PubMed Central  
1198 PMCID: PMCPMC4102568.
- 1199 49. Barski A, Cuddapah S, Cui K, Roh TY, Schones DE, Wang Z, et al. High-resolution profiling of  
1200 histone methylations in the human genome. *Cell.* 2007;129(4):823-37. doi: 10.1016/j.cell.2007.05.009.  
1201 PubMed PMID: 17512414.
- 1202 50. Bhatt S, Ashlock BM, Toomey NL, Diaz LA, Mesri EA, Lossos IS, et al. Efficacious  
1203 proteasome/HDAC inhibitor combination therapy for primary effusion lymphoma. *J Clin Invest.*  
1204 2013;123(6):2616-28. doi: 10.1172/JCI64503. PubMed PMID: 23635777; PubMed Central PMCID:  
1205 PMCPMC3668825.
- 1206 51. Renne R, Zhong W, Herndier B, McGrath M, Abbey N, Kedes D, et al. Lytic growth of Kaposi's  
1207 sarcoma-associated herpesvirus (human herpesvirus 8) in culture. *Nat Med.* 1996;2(3):342-6. PubMed  
1208 PMID: 8612236.
- 1209 52. Gwack Y, Byun H, Hwang S, Lim C, Choe J. CREB-binding protein and histone deacetylase  
1210 regulate the transcriptional activity of Kaposi's sarcoma-associated herpesvirus open reading frame 50. *J*  
1211 *Virool.* 2001;75(4):1909-17. doi: 10.1128/JVI.75.4.1909-1917.2001. PubMed PMID: 11160690; PubMed  
1212 Central PMCID: PMCPMC115137.
- 1213 53. Sun R, Lin SF, Gradoville L, Yuan Y, Zhu F, Miller G. A viral gene that activates lytic cycle  
1214 expression of Kaposi's sarcoma-associated herpesvirus. *Proc Natl Acad Sci U S A.* 1998;95(18):10866-71.  
1215 PubMed PMID: 9724796; PubMed Central PMCID: PMCPMC27987.
- 1216 54. Davy C, Doorbar J. G2/M cell cycle arrest in the life cycle of viruses. *Virology.* 2007;368(2):219-  
1217 26. doi: 10.1016/j.virol.2007.05.043. PubMed PMID: 17675127.
- 1218 55. Serrano M, Lin AW, McCurrach ME, Beach D, Lowe SW. Oncogenic ras provokes premature cell  
1219 senescence associated with accumulation of p53 and p16INK4a. *Cell.* 1997;88(5):593-602. PubMed  
1220 PMID: 9054499.
- 1221 56. Adams PD. Healing and Hurting: Molecular Mechanisms, Functions, and Pathologies of Cellular  
1222 Senescence. *Molecular Cell.* 2009;36(1):2-14. doi: 10.1016/j.molcel.2009.09.021. PubMed PMID:  
1223 WOS:000271060500002.
- 1224 57. Koopal S, Furuhielm JH, Jarviluoma A, Jaamaa S, Pyakurel P, Pussinen C, et al. Viral oncogene-  
1225 induced DNA damage response is activated in Kaposi sarcoma tumorigenesis. *Plos Pathogens.*  
1226 2007;3(9):1348-60. doi: ARTN e140  
1227 10.1371/journal.ppat.0030140. PubMed PMID: WOS:000249768300016.
- 1228 58. Leida AM, Cyr DP, Hill RJ, Lee PWK, McCormick C. Subversion of Autophagy by Kaposi's Sarcoma-  
1229 Associated Herpesvirus Impairs Oncogene-Induced Senescence. *Cell Host & Microbe.* 2012;11(2):167-80.  
1230 doi: 10.1016/j.chom.2012.01.005. PubMed PMID: WOS:000300922700009.

- 1231 59. Dimri GP, Lee X, Basile G, Acosta M, Scott G, Roskelley C, et al. A biomarker that identifies  
1232 senescent human cells in culture and in aging skin in vivo. *Proc Natl Acad Sci U S A*. 1995;92(20):9363-7.  
1233 PubMed PMID: 7568133; PubMed Central PMCID: PMCPMC40985.
- 1234 60. Kuilman T, Michaloglou C, Mooi WJ, Peeper DS. The essence of senescence. *Genes Dev*.  
1235 2010;24(22):2463-79. doi: 10.1101/gad.1971610. PubMed PMID: 21078816; PubMed Central PMCID:  
1236 PMCPMC2975923.
- 1237 61. Coppe JP, Patil CK, Rodier F, Sun Y, Munoz DP, Goldstein J, et al. Senescence-associated  
1238 secretory phenotypes reveal cell-nonautonomous functions of oncogenic RAS and the p53 tumor  
1239 suppressor. *PLoS Biol*. 2008;6(12):2853-68. doi: 10.1371/journal.pbio.0060301. PubMed PMID:  
1240 19053174; PubMed Central PMCID: PMCPMC2592359.
- 1241 62. Golas G, Alonso JD, Toth Z. Characterization of de novo lytic infection of dermal lymphatic  
1242 microvascular endothelial cells by Kaposi's sarcoma-associated herpesvirus. *Virology*. 2019;536:27-31.  
1243 doi: 10.1016/j.virol.2019.07.028. PubMed PMID: 31394409; PubMed Central PMCID: PMCPMC6733618.
- 1244 63. Chang HH, Ganem D. A unique herpesviral transcriptional program in KSHV-infected lymphatic  
1245 endothelial cells leads to mTORC1 activation and rapamycin sensitivity. *Cell Host Microbe*.  
1246 2013;13(4):429-40. doi: 10.1016/j.chom.2013.03.009. PubMed PMID: 23601105; PubMed Central  
1247 PMCID: PMC3774835.
- 1248 64. Schulz TF, Cesarman E. Kaposi Sarcoma-associated Herpesvirus: mechanisms of oncogenesis.  
1249 *Curr Opin Virol*. 2015;14:116-28. doi: 10.1016/j.coviro.2015.08.016. PubMed PMID: 26431609.
- 1250 65. Weiss G, Shemer A, Trau H. The Koebner phenomenon: review of the literature. *J Eur Acad*  
1251 *Dermatol Venereol*. 2002;16(3):241-8. PubMed PMID: 12195563.
- 1252 66. Quante M, Tu SP, Tomita H, Gonda T, Wang SS, Takashi S, et al. Bone marrow-derived  
1253 myofibroblasts contribute to the mesenchymal stem cell niche and promote tumor growth. *Cancer Cell*.  
1254 2011;19(2):257-72. doi: 10.1016/j.ccr.2011.01.020. PubMed PMID: 21316604; PubMed Central PMCID:  
1255 PMCPMC3060401.
- 1256 67. Thornton SC, Mueller SN, Levine EM. Human endothelial cells: use of heparin in cloning and  
1257 long-term serial cultivation. *Science*. 1983;222(4624):623-5. PubMed PMID: 6635659.
- 1258 68. Folkman J, Klagsbrun M. Angiogenic factors. *Science*. 1987;235(4787):442-7. PubMed PMID:  
1259 2432664.
- 1260 69. Burgess WH, Maciag T. The heparin-binding (fibroblast) growth factor family of proteins. *Annu*  
1261 *Rev Biochem*. 1989;58:575-606. doi: 10.1146/annurev.bi.58.070189.003043. PubMed PMID: 2549857.
- 1262 70. Ensoli B, Sturzl M. Kaposi's sarcoma: a result of the interplay among inflammatory cytokines,  
1263 angiogenic factors and viral agents. *Cytokine Growth Factor Rev*. 1998;9(1):63-83. PubMed PMID:  
1264 9720757.
- 1265 71. Ensoli B, Nakamura S, Salahuddin SZ, Biberfeld P, Larsson L, Beaver B, et al. AIDS-Kaposi's  
1266 sarcoma-derived cells express cytokines with autocrine and paracrine growth effects. *Science*.  
1267 1989;243(4888):223-6. PubMed PMID: 2643161.
- 1268 72. Ensoli B, Gendelman R, Markham P, Fiorelli V, Colombini S, Raffeld M, et al. Synergy between  
1269 basic fibroblast growth factor and HIV-1 Tat protein in induction of Kaposi's sarcoma. *Nature*.  
1270 1994;371(6499):674-80. doi: 10.1038/371674a0. PubMed PMID: 7935812.
- 1271 73. Samaniego F, Markham PD, Gallo RC, Ensoli B. Inflammatory cytokines induce AIDS-Kaposi's  
1272 sarcoma-derived spindle cells to produce and release basic fibroblast growth factor and enhance  
1273 Kaposi's sarcoma-like lesion formation in nude mice. *J Immunol*. 1995;154(7):3582-92. PubMed PMID:  
1274 7897237.
- 1275 74. Dhahri D, Sato-Kusubata K, Ohki-Koizumi M, Nishida C, Tashiro Y, Munakata S, et al. Fibrinolytic  
1276 crosstalk with endothelial cells expands murine mesenchymal stromal cells. *Blood*. 2016;128(8):1063-75.  
1277 doi: 10.1182/blood-2015-10-673103. PubMed PMID: 27283026.

- 1278 75. Staudt MR, Kanan Y, Jeong JH, Papin JF, Hines-Boykin R, Dittmer DP. The tumor  
1279 microenvironment controls primary effusion lymphoma growth in vivo. *Cancer Res.* 2004;64(14):4790-9.  
1280 doi: 10.1158/0008-5472.CAN-03-3835. PubMed PMID: 15256448.
- 1281 76. Staskus KA, Zhong W, Gebhard K, Herndier B, Wang H, Renne R, et al. Kaposi's sarcoma-  
1282 associated herpesvirus gene expression in endothelial (spindle) tumor cells. *J Virol.* 1997;71(1):715-9.  
1283 PubMed PMID: 8985403; PubMed Central PMCID: PMC191104.
- 1284 77. Dittmer DP. Transcription profile of Kaposi's sarcoma-associated herpesvirus in primary Kaposi's  
1285 sarcoma lesions as determined by real-time PCR arrays. *Cancer Res.* 2003;63(9):2010-5. PubMed PMID:  
1286 12727810.
- 1287 78. Hosseinipour MC, Sweet KM, Xiong J, Namarika D, Mwafongo A, Nyirenda M, et al. Viral profiling  
1288 identifies multiple subtypes of Kaposi's sarcoma. *MBio.* 2014;5(5):e01633-14. doi: 10.1128/mBio.01633-  
1289 14. PubMed PMID: 25249280; PubMed Central PMCID: PMC4173763.
- 1290 79. Emuss V, Lagos D, Pizzey A, Gratrix F, Henderson SR, Boshoff C. KSHV manipulates Notch  
1291 signaling by DLL4 and JAG1 to alter cell cycle genes in lymphatic endothelia. *PLoS Pathog.*  
1292 2009;5(10):e1000616. doi: 10.1371/journal.ppat.1000616. PubMed PMID: 19816565; PubMed Central  
1293 PMCID: PMC2751827.
- 1294 80. Sodhi A, Chaisuparat R, Hu J, Ramsdell AK, Manning BD, Sausville EA, et al. The TSC2/mTOR  
1295 pathway drives endothelial cell transformation induced by the Kaposi's sarcoma-associated herpesvirus  
1296 G protein-coupled receptor. *Cancer Cell.* 2006;10(2):133-43. doi:10.1016/j.ccr.2006.05.026. PubMed  
1297 PMID: 16904612.
- 1298 81. Austgen K, Oakes SA, Ganem D. Multiple defects, including premature apoptosis, prevent  
1299 Kaposi's sarcoma-associated herpesvirus replication in murine cells. *J Virol.* 2012;86(3):1877-82. doi:  
1300 10.1128/JVI.06600-11. PubMed PMID: 22130538; PubMed Central PMCID: PMC3264352.
- 1301 82. Nikitin PA, Yan CM, Forte E, Bocedi A, Tourigny JP, White RE, et al. An ATM/Chk2-mediated DNA  
1302 damage-responsive signaling pathway suppresses Epstein-Barr virus transformation of primary human B  
1303 cells. *Cell Host Microbe.* 2010;8(6):510-22. doi: 10.1016/j.chom.2010.11.004. PubMed PMID: 21147465;  
1304 PubMed Central PMCID: PMC3049316.
- 1305 83. Li Y, Zhong C, Liu D, Yu W, Chen W, Wang Y, et al. Evidence for Kaposi Sarcoma Originating from  
1306 Mesenchymal Stem Cell through KSHV-induced Mesenchymal-to-Endothelial Transition. *Cancer Res.*  
1307 2018;78(1):230-45. Epub 2017/10/27. doi: 10.1158/0008-5472.CAN-17-1961. PubMed PMID: 29066510;  
1308 PubMed Central PMCID: PMC5754241.
- 1309 84. Ponte AL, Marais E, Gallay N, Langonne A, Delorme B, Herault O, et al. The in vitro migration  
1310 capacity of human bone marrow mesenchymal stem cells: comparison of chemokine and growth factor  
1311 chemotactic activities. *Stem Cells.* 2007;25(7):1737-45. doi: 10.1634/stemcells.2007-0054. PubMed  
1312 PMID: 17395768.
- 1313 85. Werner S, Hofschneider PH, Heldin CH, Ostman A, Roth WK. Cultured Kaposi's sarcoma-derived  
1314 cells express functional PDGF A-type and B-type receptors. *Exp Cell Res.* 1990;187(1):98-103. PubMed  
1315 PMID: 2153568.
- 1316 86. Sturzl M, Roth WK, Brockmeyer NH, Zietz C, Speiser B, Hofschneider PH. Expression of platelet-  
1317 derived growth factor and its receptor in AIDS-related Kaposi sarcoma in vivo suggests paracrine and  
1318 autocrine mechanisms of tumor maintenance. *Proc Natl Acad Sci U S A.* 1992;89(15):7046-50. PubMed  
1319 PMID: 1323124; PubMed Central PMCID: PMC49642.
- 1320 87. Khachigian LM, Fries JW, Benz MW, Bonthron DT, Collins T. Novel cis-acting elements in the  
1321 human platelet-derived growth factor B-chain core promoter that mediate gene expression in cultured  
1322 vascular endothelial cells. *The Journal of biological chemistry.* 1994;269(36):22647-56. PubMed PMID:  
1323 8077216.
- 1324 88. Arias C, Weisburd B, Stern-Ginossar N, Mercier A, Madrid AS, Bellare P, et al. KSHV 2.0: a  
1325 comprehensive annotation of the Kaposi's sarcoma-associated herpesvirus genome using next-

1326 generation sequencing reveals novel genomic and functional features. *PLoS Pathog.*  
1327 2014;10(1):e1003847. doi: 10.1371/journal.ppat.1003847. PubMed PMID: 24453964; PubMed Central  
1328 PMCID: PMC3894221.

1329 89. Bolger AM, Lohse M, Usadel B. Trimmomatic: a flexible trimmer for Illumina sequence data.  
1330 *Bioinformatics.* 2014;30(15):2114-20. doi: 10.1093/bioinformatics/btu170. PubMed PMID: 24695404;  
1331 PubMed Central PMCID: PMC4103590.

1332 90. Brulois KF, Chang H, Lee AS, Ensser A, Wong LY, Toth Z, et al. Construction and manipulation of a  
1333 new Kaposi's sarcoma-associated herpesvirus bacterial artificial chromosome clone. *J Virol.*  
1334 2012;86(18):9708-20. doi: 10.1128/JVI.01019-12. PubMed PMID: 22740391; PubMed Central PMCID:  
1335 PMC3446615.

1336 91. Langmead B, Salzberg SL. Fast gapped-read alignment with Bowtie 2. *Nat Methods.*  
1337 2012;9(4):357-9. doi: 10.1038/nmeth.1923. PubMed PMID: 22388286; PubMed Central PMCID:  
1338 PMC3322381.

1339 92. Zhang Y, Liu T, Meyer CA, Eeckhoute J, Johnson DS, Bernstein BE, et al. Model-based analysis of  
1340 ChIP-Seq (MACS). *Genome Biol.* 2008;9(9):R137. doi: 10.1186/gb-2008-9-9-r137. PubMed PMID:  
1341 18798982; PubMed Central PMCID: PMC2592715.

1342

1343

1344

1345

1346

1347

1348

1349

1350

1351

1352



1353

1354 **FIGURE LEGENDS**

1355

1356 **Figure 1. KSHV infection is only tumorigenic in infected MSC PDGFRA-positive lineage**  
1357 **grown in pro-angiogenic KS-like environment.**

1358 A) Mouse bone marrow-derived mesenchymal stem cells were stained for PDGFRA (P $\alpha$ ) and  
1359 SCA-1 (S) expression. Mouse MSC Sca-1-positive, PDGFRA-positive (P $\alpha$ (+)S) and negative  
1360 (P $\alpha$ (-)S) populations were sorted by flow cytometry.

1361 B) PDGFRA-positive (P $\alpha$ (+)S) and PDGFRA-negative (P $\alpha$ (-)S) MSCs were latently infected with  
1362 rKSHV.219 and analyzed for GFP expression using a fluorescence microscope.

1363 C) Immunofluorescence analysis of KSHV-infected P $\alpha$ (+)S (K- P $\alpha$ (+)S) and P $\alpha$ (-)S (K- P $\alpha$ (-)S) to  
1364 evaluate KSHV LANA expression (red), nuclei were counterstained with DAPI (blue).

1365 D) Fold-changes in KSHV gene expression between 24 hours KSHV post-infection and after  
1366 KSHV latency establishment in MSC or KS-like media as determined by RT-qPCR. Triplicates  
1367 are shown as means  $\pm$  SD. K-P $\alpha$ (-)S population on the top and K-P $\alpha$ (+)S population on the  
1368 bottom. \*P < 0.05.

1369 E) Soft agar colony formation assay to determine anchorage-independent cell growth in  
1370 P $\alpha$ (+)S KS, K-P $\alpha$ (+)S MSC, and K-P $\alpha$ (+)S KS cells.

1371 F) Tumor-Free mice curve from subcutaneous injection of P $\alpha$ (+)S KS, K-P $\alpha$ (+)S MSC, and K-  
1372 P $\alpha$ (+)S KS cells into nude mice. N=6.

1373 G) Representative microscopic histological section of mouse KS-like mECK36 tumor and K-  
1374 P $\alpha$ (+)S KS tumor stained with hematoxylin and eosin (H&E).

1375 H) Immunofluorescence analysis of KSHV LANA (red) in K-P $\alpha$ (+)S KS tumor, nuclei were  
1376 counterstained with DAPI (blue).

1377 I) Immunofluorescence analysis of PECAM $_1$  (red) in K-P $\alpha$ (+)S KS tumor, nuclei were  
1378 counterstained with DAPI (blue).

1379 **Figure 2. Upregulation of KSHV lytic gene expression during *in vivo* tumorigenesis.**

1380 A) Genome-wide analysis of KSHV transcripts by RNA deep sequencing, comparison of the  
1381 transcription profiles of K-P $\alpha$ (+)S KS cells (N=3) and K-P $\alpha$ (+)S KS tumors (N=8) derived from  
1382 these cells. Transcriptional levels of viral genes were quantified in reads per kilobase of coding  
1383 region per million total read numbers (RPKM) in the sample. The y-axis represents the number  
1384 of reads aligned to each nucleotide position and x-axis represents the KSHV genome position.

1385 B) Unsupervised hierarchical clustering of KSHV transcriptome among K-P $\alpha$ (+)S KS cells, K-  
1386 P $\alpha$ (+)S KS tumors and human KS tumors. The arrows indicate KSHV oncogenes.

1387 C) Multidimensional scaling plot showing the distance of each sample from each other  
1388 determined by their KSHV expression profiles.

1389 D) Total and phospho-PDGFR $\alpha$  were determined by immunoblotting in two MSC K-P $\alpha$ (+)S KS  
1390 tumors. Actin was used as a loading control.

1391 E) Immunofluorescence analysis of K-P $\alpha$ (+)S KS tumors to detect KSHV LANA (red) and  
1392 phospho-PDGFR $\alpha$  (green). Cell nuclei were counterstained with DAPI (blue).

1393 F) Volcano plot showing 1,861 differentially expressed genes (DEGs) analyzed by RNA-Seq  
1394 between K-P $\alpha$ (+)S KS tumors *in vivo* and K-P $\alpha$ (+)S KS cells *in vitro*.

1395 G) Functional enrichment analysis based on genes differentially expressed among K-P $\alpha$ (+)S KS  
1396 tumors and K-P $\alpha$ (+)S KS cells.

1397

1398 **Figure 3. A de-repressed KSHV epigenome allows for expression of oncogenic KSHV genes**  
1399 **in tumorigenic PDGFR $\alpha$ -positive MSCs growing in KS-like environment.**

1400 A) Genome-wide analysis of KSHV transcripts by RNA deep sequencing, comparison of the  
1401 transcription profiles of MSC K-P $\alpha$ (+)S MSC and K-P $\alpha$ (+)S KS cells. Transcriptional levels of  
1402 viral genes were quantified in reads per kilobase of coding region per million total read  
1403 numbers (RPKM) in the sample. The y-axis represents the number of reads aligned to each  
1404 nucleotide position and x-axis represents the KSHV genome position. Global patterns of H<sub>3</sub>K<sub>4</sub>  
1405 tri-methylation (H<sub>3</sub>K<sub>4</sub>me<sub>3</sub>) and H<sub>3</sub>K<sub>27</sub> tri-methylation (H<sub>3</sub>K<sub>27</sub>me<sub>3</sub>) in K-P $\alpha$ (+)S MSC and K-  
1406 P $\alpha$ (+)S KS cells were analyzed by ChIP-seq assays as described in the text. Values shown on the  
1407 y-axis represent the relative enrichment of normalized signals from the immunoprecipitated  
1408 material over input.

1409 B) Heat map representation of changes in histone modifications at the gene regulatory regions  
1410 of KSHV genes grouped by expression class Latent, Immediate-early lytic, Early lytic and Late  
1411 lytic genes. The rows display the relative abundance of the indicated histone modification  
1412 within the  $-1$  kb to  $+1$  kb genomic regions flanking the translational start site (TSS) of each viral  
1413 gene. The blue and yellow colors denote lower-than-average and higher-than-average  
1414 enrichment, respectively.

1415

1416 **Figure 4. Global gene expression profiling and histone marks distribution in K-P $\alpha$ (+)S KS**  
1417 **and K-P $\alpha$ (+)S MSCs.**

1418 A) Volcano plot showing 454 differentially expressed genes (DEGs) analyzed by RNA-seq  
1419 between K-P $\alpha$ (+)S MSC and K-P $\alpha$ (+)S KS cells.

1420 B) Functional enrichment analysis based on genes differentially expressed among K-P $\alpha$ (+)S  
1421 MSC and K-P $\alpha$ (+)S KS cells.

1422 C) H3K4me3 ChIP-seq signals on DEGs in K-P $\alpha$ (+)S MSC and K-P $\alpha$ (+)S KS cells.

1423 D) H3K27me3 ChIP-seq signals on DEGs in K-P $\alpha$ (+)S MSC and K-P $\alpha$ (+)S KS cells.

1424 E) H3K4me3 (left) and H3K27me3 (right) ChIP-seq signals in K-P $\alpha$ (+)S MSC and K-P $\alpha$ (+)S KS  
1425 cells.

1426 F) Venn diagrams showing the overlap between H3K27me3-enriched genes in K-P $\alpha$ (+)S MSC  
1427 and K-P $\alpha$ (+)S KS cells.

1428 G) Pathway analysis representing KEGG and REACTOME pathway enriched by the genes with  
1429 differentially enriched regions (DERs) of H3K27me3 and H3K4me3 in K-P $\alpha$ (+)S MSC (bottom)  
1430 and K-P $\alpha$ (+)S KS (top) cells.

1431 H) Genome browser screenshots of H3K27me3 ChIP-seq signal in K-P $\alpha$ (+)S MSC and K-P $\alpha$ (+)S  
1432 KS cells at the IFN $\beta$  genomic region.

1433 I) Fold-changes of IFN $\beta$  gene expression in K-P $\alpha$ (+)S MSC and K-P $\alpha$ (+)S KS cells before and  
1434 after KSHV lytic reactivation, determined by RT-qPCR. Triplicates are shown as means  $\pm$  SD.  
1435 \*P < 0.05.

1436

1437 **Figure 5. A permissive epigenetic landscape induced by a pro-angiogenic environment**  
1438 **promotes an oncogenic viral lytic-driven mechanism of tumorigenesis.**

1439 A) Fold-changes of KSHV gene expression in K-P $\alpha$ (+)S MSC and K-P $\alpha$ (+)S KS cells after SAHA  
1440 (7,5  $\mu$ M) treatment for 24 hours, determined by RT-qPCR. Triplicates fold change to un-  
1441 induced K-P $\alpha$ (+)S MSC are presented as means  $\pm$  SD. \*P < 0.05.

1442 B) Percentage of RFP-positive and GFP-positive cells after 72 hours of KSHV reactivation  
1443 measured by Flow cytometry in K-P $\alpha$ (+)S MSC and K-P $\alpha$ (+)S KS cells.

1444 C) Left panel, fold-changes of KSHV gene expression in sorted RFP-positive population of K-  
1445 P $\alpha$ (+)S MSC and K-P $\alpha$ (+)S KS cells after 72 hours of SAHA treatment were determined by RT-  
1446 qPCR. Triplicates fold change to un-induced K-P $\alpha$ (+)S MSC are presented as means  $\pm$  SD. \*P <  
1447 0.05. The heatmap for the mean RT-qPCR data is shown below. Right panel, fold-changes of

1448 KSHV gene expression in sorted GFP-positive population in K-P $\alpha$ (+)S MSC and K-P $\alpha$ (+)S KS  
1449 cells after 72 hours of SAHA treatment were determined by RT-qPCR. Triplicates fold change  
1450 to un-induced K-P $\alpha$ (+)S MSC are presented as means  $\pm$  SD. \*P < 0.05. The heatmap for the  
1451 mean RT-qPCR data is shown below.

1452 D) K-P $\alpha$ (+)S MSC and K-P $\alpha$ (+)S KS cells were treated with SAHA and incubated in an Incucyte  
1453 Zoom (Essen Bioscience), acquiring red and green fluorescence images. The cell proliferation  
1454 graphs of RFP-positive (left panel) and GFP-positive (right panel) cells were graphed over time  
1455 as a measure of proliferation and shown as mean  $\pm$  SE from three replicates for each condition.

1456 E) Immunofluorescence analysis of Ki67 expression (red) was performed after 72 hours of  
1457 SAHA treatment on GFP-positive K-P $\alpha$ (+)S MSC and GFP-positive K-P $\alpha$ (+)S KS cells; nuclei  
1458 were counterstained with DAPI (blue).The quantification is shown at the right of the images.  
1459 Values are presented as means  $\pm$  SD. \*P < 0.05.

1460 F) SA  $\beta$  -gal staining was performed after 72 hours of SAHA treatment on K-P $\alpha$ (+)S MSC and  
1461 K-P $\alpha$ (+)S KS cells. The quantification is shown at the right of corresponding panels. Values are  
1462 presented as means  $\pm$  SD. \*P < 0.05

1463 G) mRNA fold-changes of markers of senescence and SASP or Senescence Associated  
1464 Secretory Phenotype in K-P $\alpha$ (+)S MSC and K-P $\alpha$ (+)S KS after 72 hours of SAHA treatment  
1465 were assessed by RT-qPCR in triplicate and are presented as means  $\pm$  SD. \*P < 0.05.

1466 H) p53, p21, and Cyclin D1 levels were analyzed by immunoblotting in K-P $\alpha$ (+)S MSC and K-  
1467 P $\alpha$ (+)S KS cells after 72 hours of SAHA treatment. Histone 3 K27 Acetylation (H3K27Ac) was  
1468 used as the control for HDAC inhibition by SAHA. Actin was used as loading control.

1469 I) Immunofluorescence analysis of  $\gamma$ H2AX expression (red) was performed after 72 hours of  
1470 SAHA treatment on GFP-positive K-P $\alpha$ (+)S MSC and GFP-positive K-P $\alpha$ (+)S KS cells; nuclei  
1471 were counterstained with DAPI (blue). The quantification is shown at the right of the images.  
1472 Values are presented as means  $\pm$  SD. \*P < 0.05.

1473 J) Spectrum In Vivo Imaging System (IVIS) of Matrigel-plugs (1 week after injection) containing  
1474 GFP-positive PDGFRA-positive MSCs from K-P $\alpha$ (+)S MSC and K-P $\alpha$ (+)S KS cells. Black Squares  
1475 indicate site of injection.

1476 K) Fold-changes of KSHV gene expression in K-P $\alpha$ (+)S MSC and K-P $\alpha$ (+)S KS after 1 week *in*  
1477 *vivo* Matrigel-plug were assessed by RT-qPCR in triplicate and are presented as means  $\pm$  SD.

1478

1479 **Figure 6. PDGFRA signaling allows KSHV-infected PDGFRA-positive MSCs grown in KS-**  
1480 **like environment to continue proliferating after lytic reactivation.**

1481 A) Mouse Phospho-Receptor Tyrosine Kinase (RTK) Array Kit used to quantify levels of  
1482 phosphorylation of 39 RTKs in K-P $\alpha$ (+)S MSC and K-P $\alpha$ (+)S KS cells after 72 hours of SAHA  
1483 treatment pointing to major activation spot corresponding to PDGF receptor alpha chain.

1484 B) Total and phospho-PDGFRA together with Total and phospho-AKT levels were analyzed by  
1485 immunoblotting in K-P $\alpha$ (+)S MSC and K-P $\alpha$ (+)S KS cells after 72 hours of SAHA treatment.

1486 C) PDGFA and PDGFB levels were analyzed by immunoblotting in K-P $\alpha$ (+)S MSC and K-P $\alpha$ (+)S  
1487 KS cells after 72 hours of SAHA treatment. Actin was used as loading control.

1488 D) K-P $\alpha$ (+)S KS cells were treated with 0.1 $\mu$ M of PDGFR tyrosine kinase inhibitor IV or left  
1489 untreated, and incubated in an Incucyte Zoom (Essen Bioscience) to acquire green  
1490 fluorescence images. The proliferation graph is shown the mean  $\pm$  SE from three replicates for  
1491 each condition.

1492 E) K-P $\alpha$ (+)S KS cells were treated with SAHA alone or in combination with 0.1 $\mu$ M of PDGFR  
1493 tyrosine kinase inhibitor IV, and incubated in an Incucyte Zoom (Essen Bioscience) to acquire  
1494 green fluorescence images. The proliferation graph is shown the mean  $\pm$  SE from three  
1495 replicates for each condition.

1496 F) Immunofluorescence analysis of Ki67 expression (red) in K-P $\alpha$ (+)S KS cells treated with  
1497 SAHA alone or in combination with 0.1  $\mu$ M of PDGFR tyrosine kinase inhibitor IV for 72 hours,  
1498 nuclei were counterstained with DAPI (blue). Infected cells are GFP-positive.

1499 G) SA  $\beta$ -gal staining was performed after 72 hours of SAHA plus 0.1  $\mu$ M of PDGFR tyrosine  
1500 kinase inhibitor IV treatment of K-P $\alpha$ (+)S KS cells.

1501 H) Total and phospho-PDGFR $\alpha$ , Cyclin D1, PDGFA and PDGFB levels were determined by  
1502 immunoblotting in K-P $\alpha$ (+)S KS cells treated with SAHA alone or in combination with 0.1  $\mu$ M of  
1503 PDGFR tyrosine kinase inhibitor IV for 72 hours. Actin was used as loading control.

1504



1505 **Figure 7. MSC culture conditions favor viral production in KSHV-infected human MSCs,**  
1506 **while KS-like culture conditions are permissive for PDGFRA-mediated proliferation of**  
1507 **infected cells.**

1508 A) Human MSC KSHV infection was monitored by fluorescence microscopy using the GFP  
1509 reporter driven by the constitutive promoter of cellular EF-1 and the RFP reporter driven by the  
1510 early lytic gene PAN promoter.

1511 B) GFP expression analysis by flow cytometer in human MSCs after 96 hours of KSHV infection  
1512 in MSC or KS-like media. The graph shown is from triplicates and presented as means  $\pm$  SD.

1513 C) RFP expression analysis by flow cytometer on human MSCs after 96 hours of KSHV infection  
1514 in MSC or KS-like media. The graph shown is from triplicates and presented as means  $\pm$  SD.  
1515 \*\*P < 0.05.

1516 D) Cell-free supernatants of rKSHV.219-infected human MSC were used to *de novo* infect HEK  
1517 AD293 cells. After 72 hours of infection, HEK AD293 GFP-positive cells were measured by flow  
1518 Cytometry. The graph shown is from triplicates and presented as means  $\pm$  SD. \*\*\*P < 0.05.

1519 E) Bars represent mean percent copy number of viral DNA levels in cell-free supernatants of  
1520 human MSCs after 96 hours of KSHV infection in MSC or KS-like media determined by qPCR.  
1521 The graph shown is from triplicates and presented as means  $\pm$  SD. \*P < 0.05.

1522 F) Fold-changes in KSHV gene expression between mouse K-P $\alpha$ (+)S MSC cells, K-hMSC MSC  
1523 and K-hMSC KS cells after 96 hours of KSHV *de novo* infection determined by RT-qPCR in  
1524 triplicates and presented as means  $\pm$  SD.

1525 G) Human MSCs were infected with KSHV in MSC or KS-like media and incubated in an  
1526 Incucyte Zoom (Essen Bioscience), acquiring red fluorescence images. The proliferation of  
1527 lytically infected cells (RFP-positive) is plotted over time. The graph shows the mean  $\pm$  SE from  
1528 three replicates for each condition.

1529 H) Human MSCs were infected with KSHV in MSC or KS-like media and incubated in an  
1530 Incucyte Zoom (Essen Bioscience), acquiring green fluorescence images. The proliferation of  
1531 latently infected cells (GFP-positive) is plotted over time. The graph shows the mean  $\pm$  SE from  
1532 three replicates for each condition.

1533 I) Human LECs KSHV infection in EGM2-MV or KS-like media was monitored by fluorescence  
1534 microscopy using the GFP reporter driven by the constitutive promoter of cellular EF-1 and the  
1535 RFP reporter driven by the early lytic gene PAN promoter.

1536 J) Human LECs were infected with KSHV in EGM2-MV or KS-like media and incubated in an  
1537 Incucyte Zoom (Essen Bioscience), acquiring red fluorescence images, top panel, and green  
1538 fluorescence images, bottom panel. The proliferation of lytically infected cells (RFP-positive,  
1539 bottom panel) and latently infected cells (GFP-positive, top panel) is plotted over time. The  
1540 graph shows the mean  $\pm$  SE from three replicates for each condition.

1541 K) Total and phospho-PDGFR $\alpha$ , Cyclin D1 and VEGFR3 levels were determined by  
1542 immunoblotting in human MSCs and LECs after 96 hours of KSHV infection in MSC, EGM2-MV  
1543 or KS-like media.

1544 L) Human MSC cells were infected with KSHV in MSC or KS-like media and incubated in an  
1545 Incucyte Zoom (Essen Bioscience) in the presence of 0.1  $\mu$ M PDGFR tyrosine kinase inhibitor  
1546 IV, acquiring green fluorescence images. KSHV infection and proliferation of the GFP positive  
1547 cells is plotted over time. The graph shows the mean  $\pm$  SE from three replicates for each  
1548 condition.

1549 M) Total and phospho-PDGFR levels were determined by immunoblotting in human MSCs  
1550 after 96 hours of KSHV infection in MSC or KS-like media in the presence of 0.1  $\mu$ M PDGFR  
1551 tyrosine kinase inhibitor IV.

1552

1553

1554 **Figure 8. PDGFRA Defines the Mesenchymal Stem Cell Kaposi's Sarcoma Progenitors by**  
1555 **Enabling KSHV Oncogenesis in an Angiogenic Environment.**

1556 Model showing PDGFRA(+)/SCA-1(+) bone marrow-derived mesenchymal stem cells (P $\alpha$ (+)S  
1557 MSCs) as KS spindle-cell progenitors. Pro-angiogenic environmental conditions typical of KS  
1558 (KS-like media), inflammation and wound healing are critical for KSHV sarcomagenesis. This is  
1559 because growth in KS-like conditions generates a de-repressed KSHV epigenome allowing  
1560 oncogenic KSHV gene expression in infected P $\alpha$ (+)S MSCs. Furthermore, these growth  
1561 conditions allow KSHV-infected P $\alpha$ (+)S MSCs to overcome KSHV-driven oncogene-induced  
1562 senescence and cell cycle arrest via a PDGFRA-signaling mechanism; thus identifying PDGFRA

1563 not only as a phenotypic determinant for KS-progenitors but also as a critical enabler for viral  
1564 oncogenesis.

1565 **Supporting information captions**

1566 **S1 Figure. Tumorigenic analysis of KSHV-infected and uninfected MSCs growing in MSC**  
1567 **media.**

1568 **S2 Figure. Percentage of KSHV de novo infection in PDGFRA-negative and PDGFRA-**  
1569 **positive cells in MSC and KS condition.**

1570 **S3 Figure. Viral DNA copy number in K-P $\alpha$ (+)S MSC cells, K-P $\alpha$ (+)S KS cells and tumors.**

1571

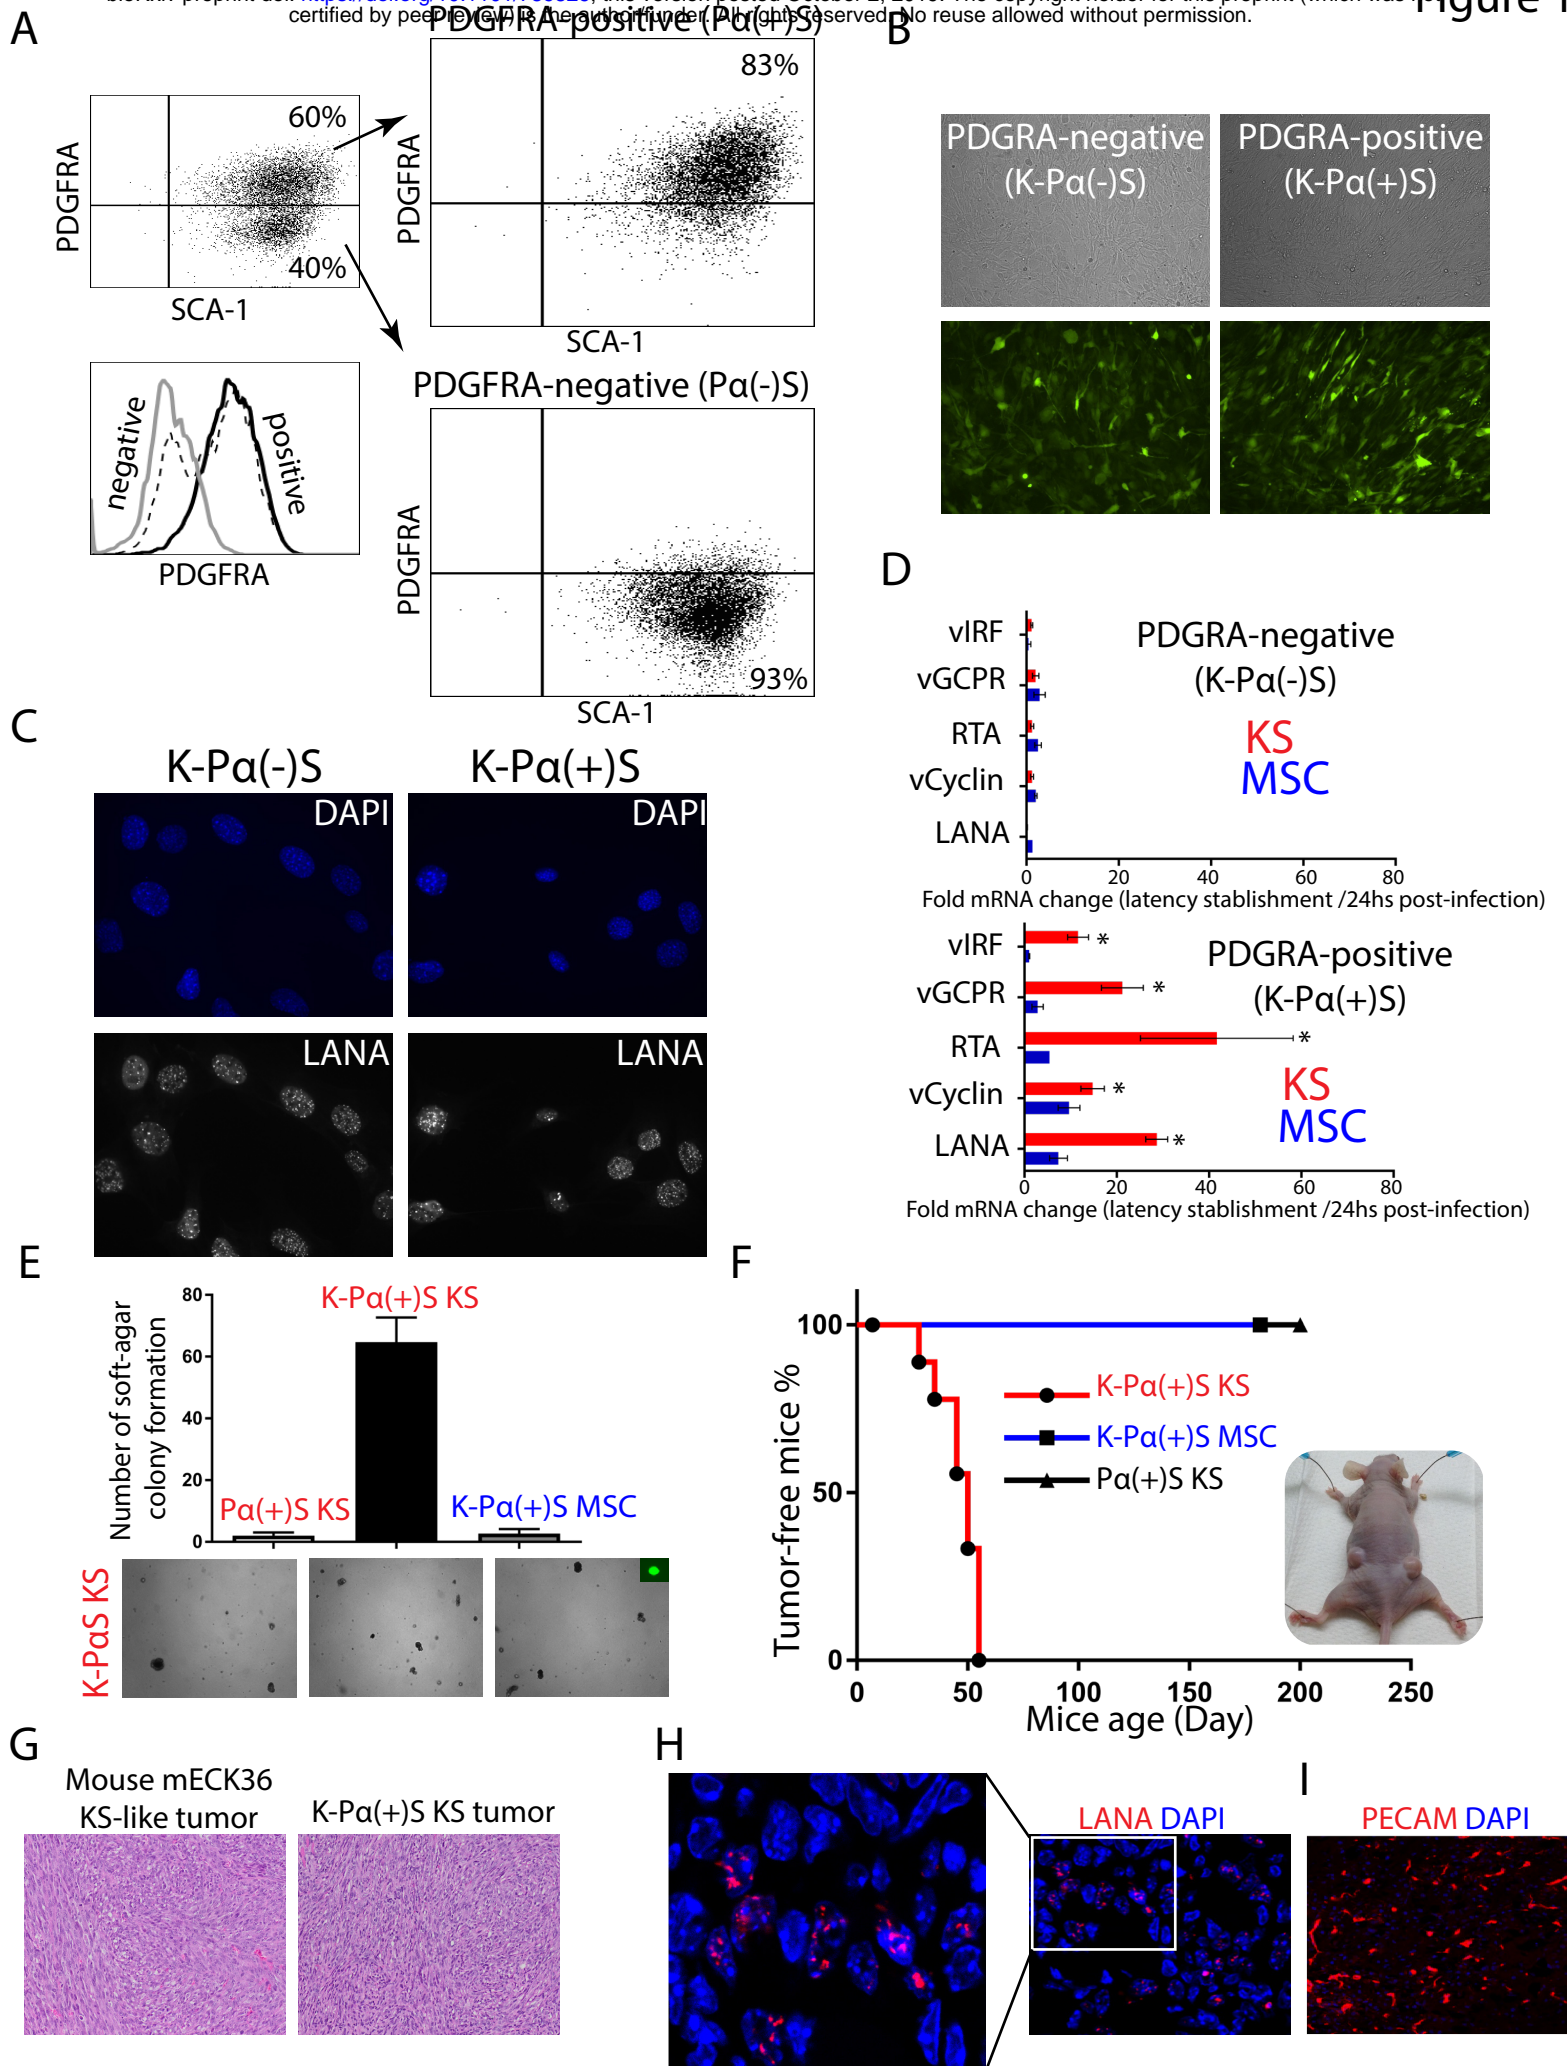

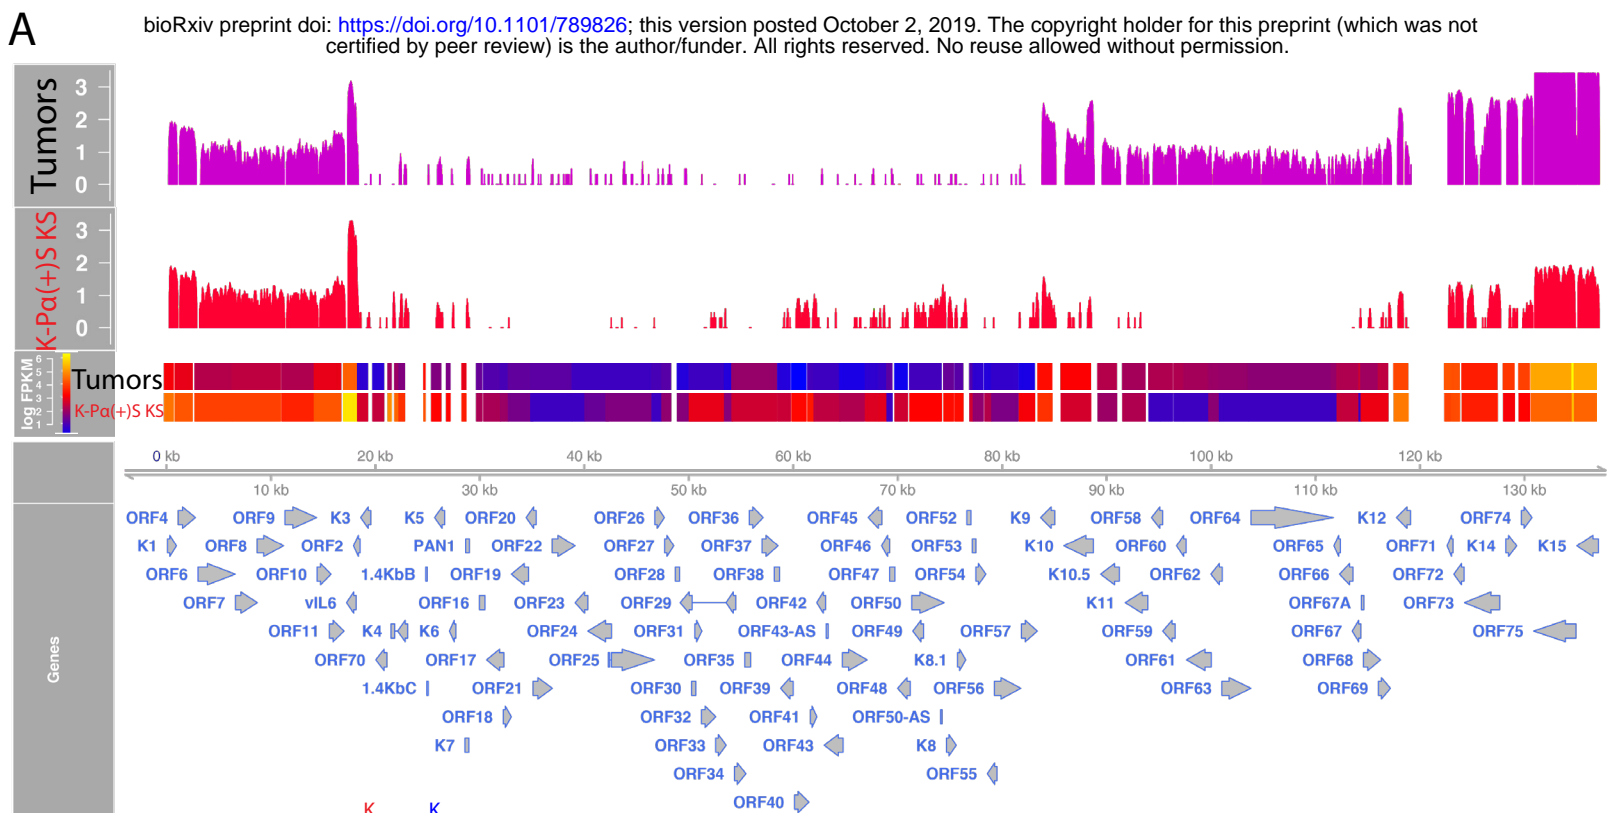

**B**

K-Pa(+)/S/CS tumors (orange)  
Human KS (green)  
Pa(+)/S/CS (red)  
MSC (blue)

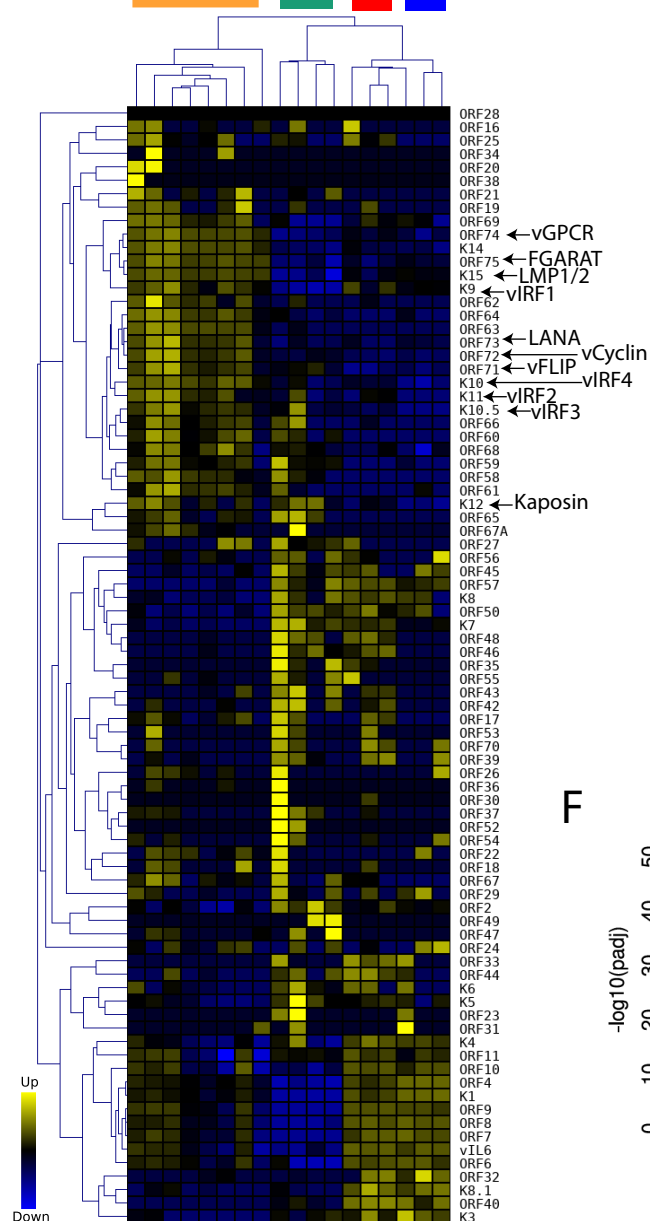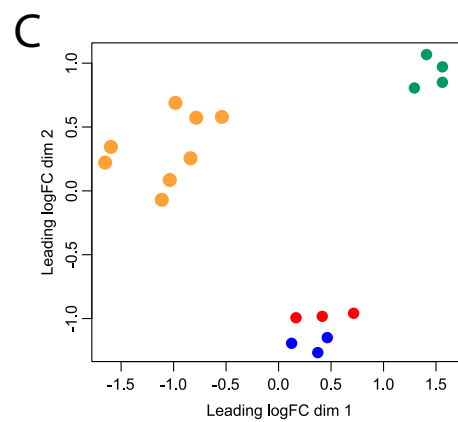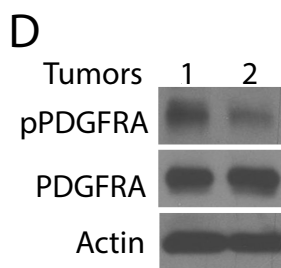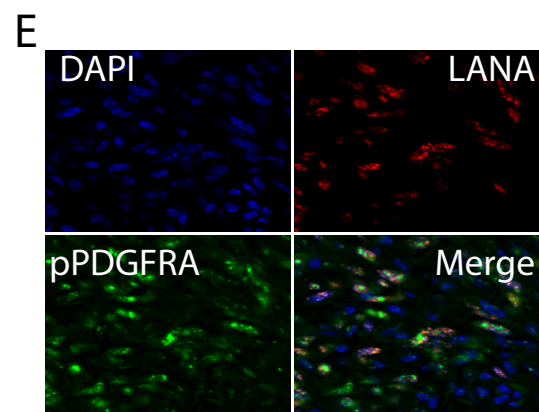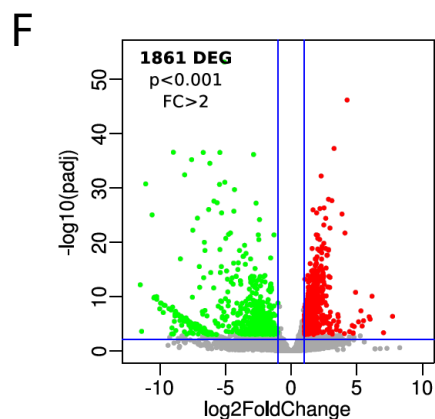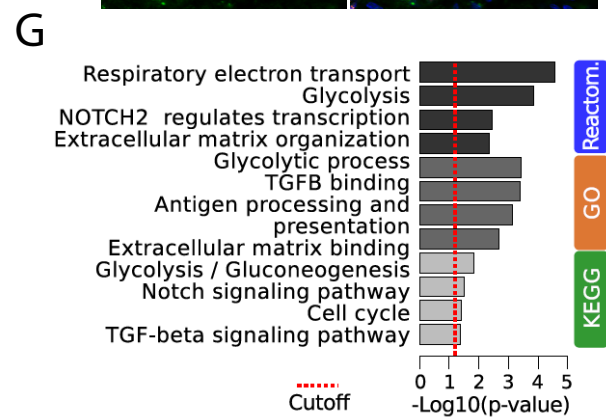

A

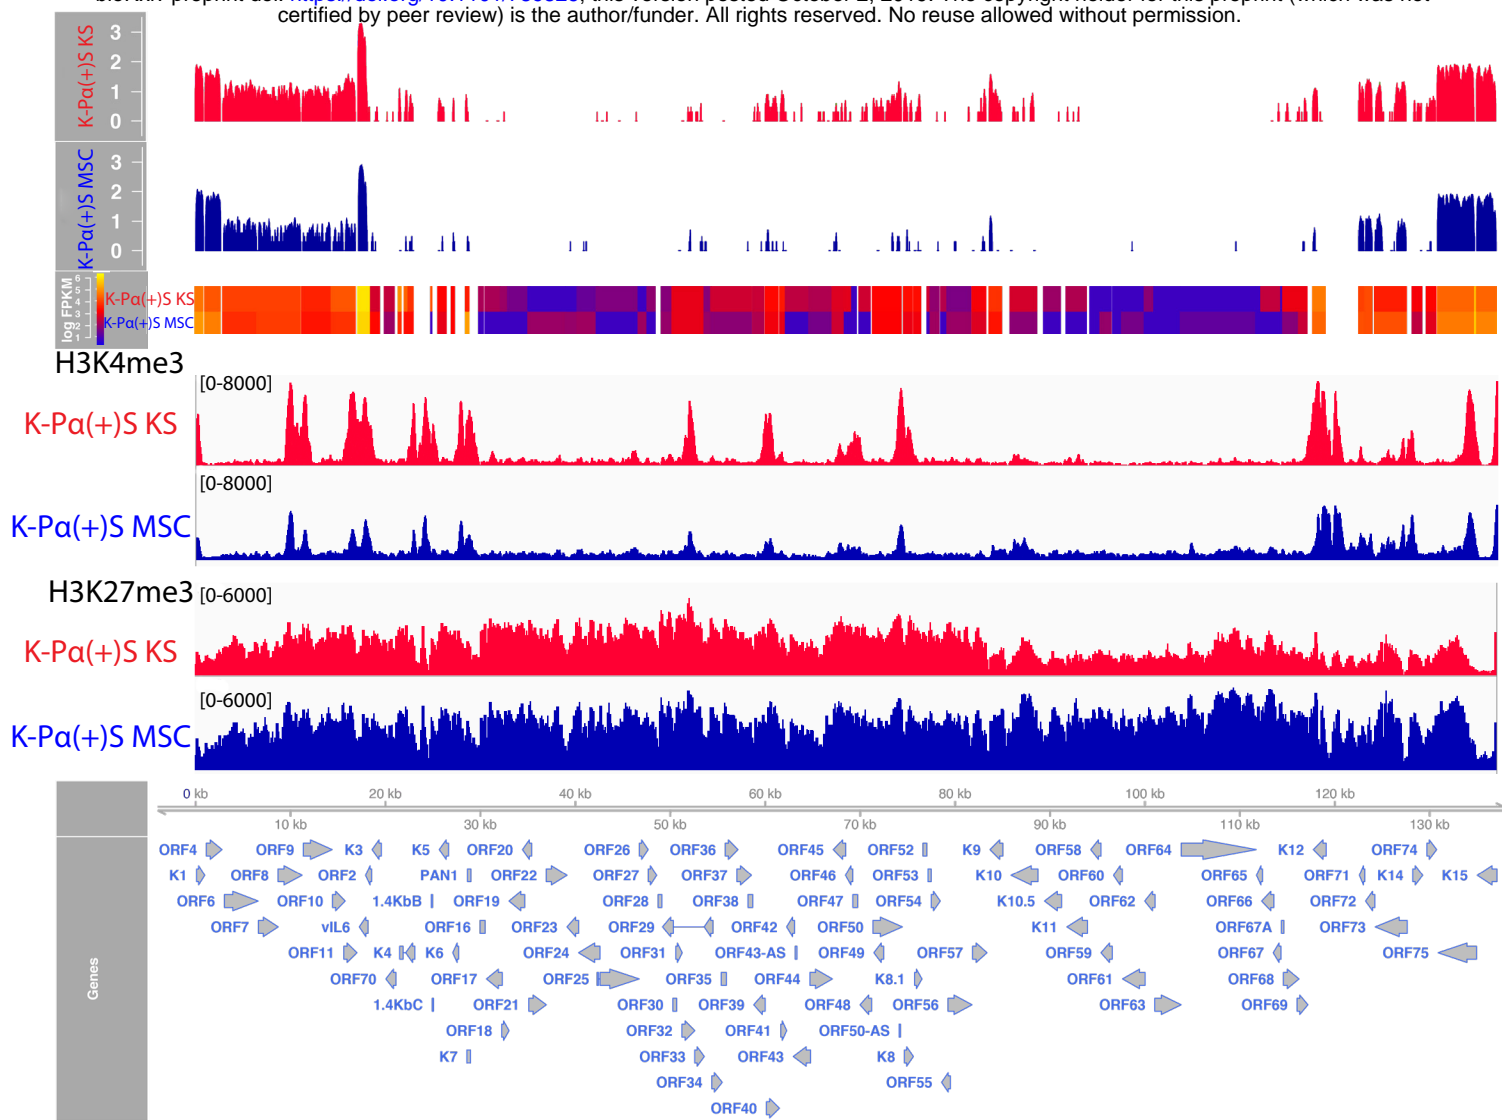

B

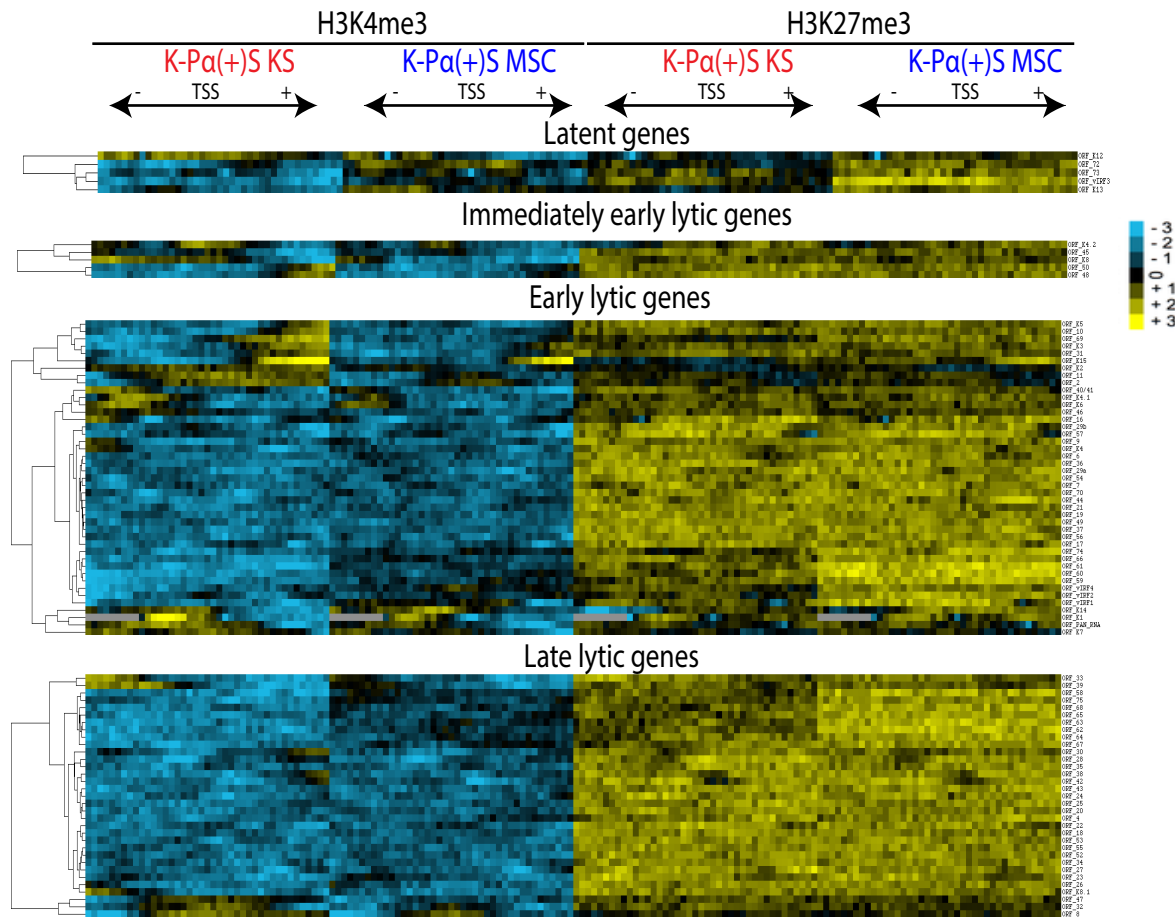

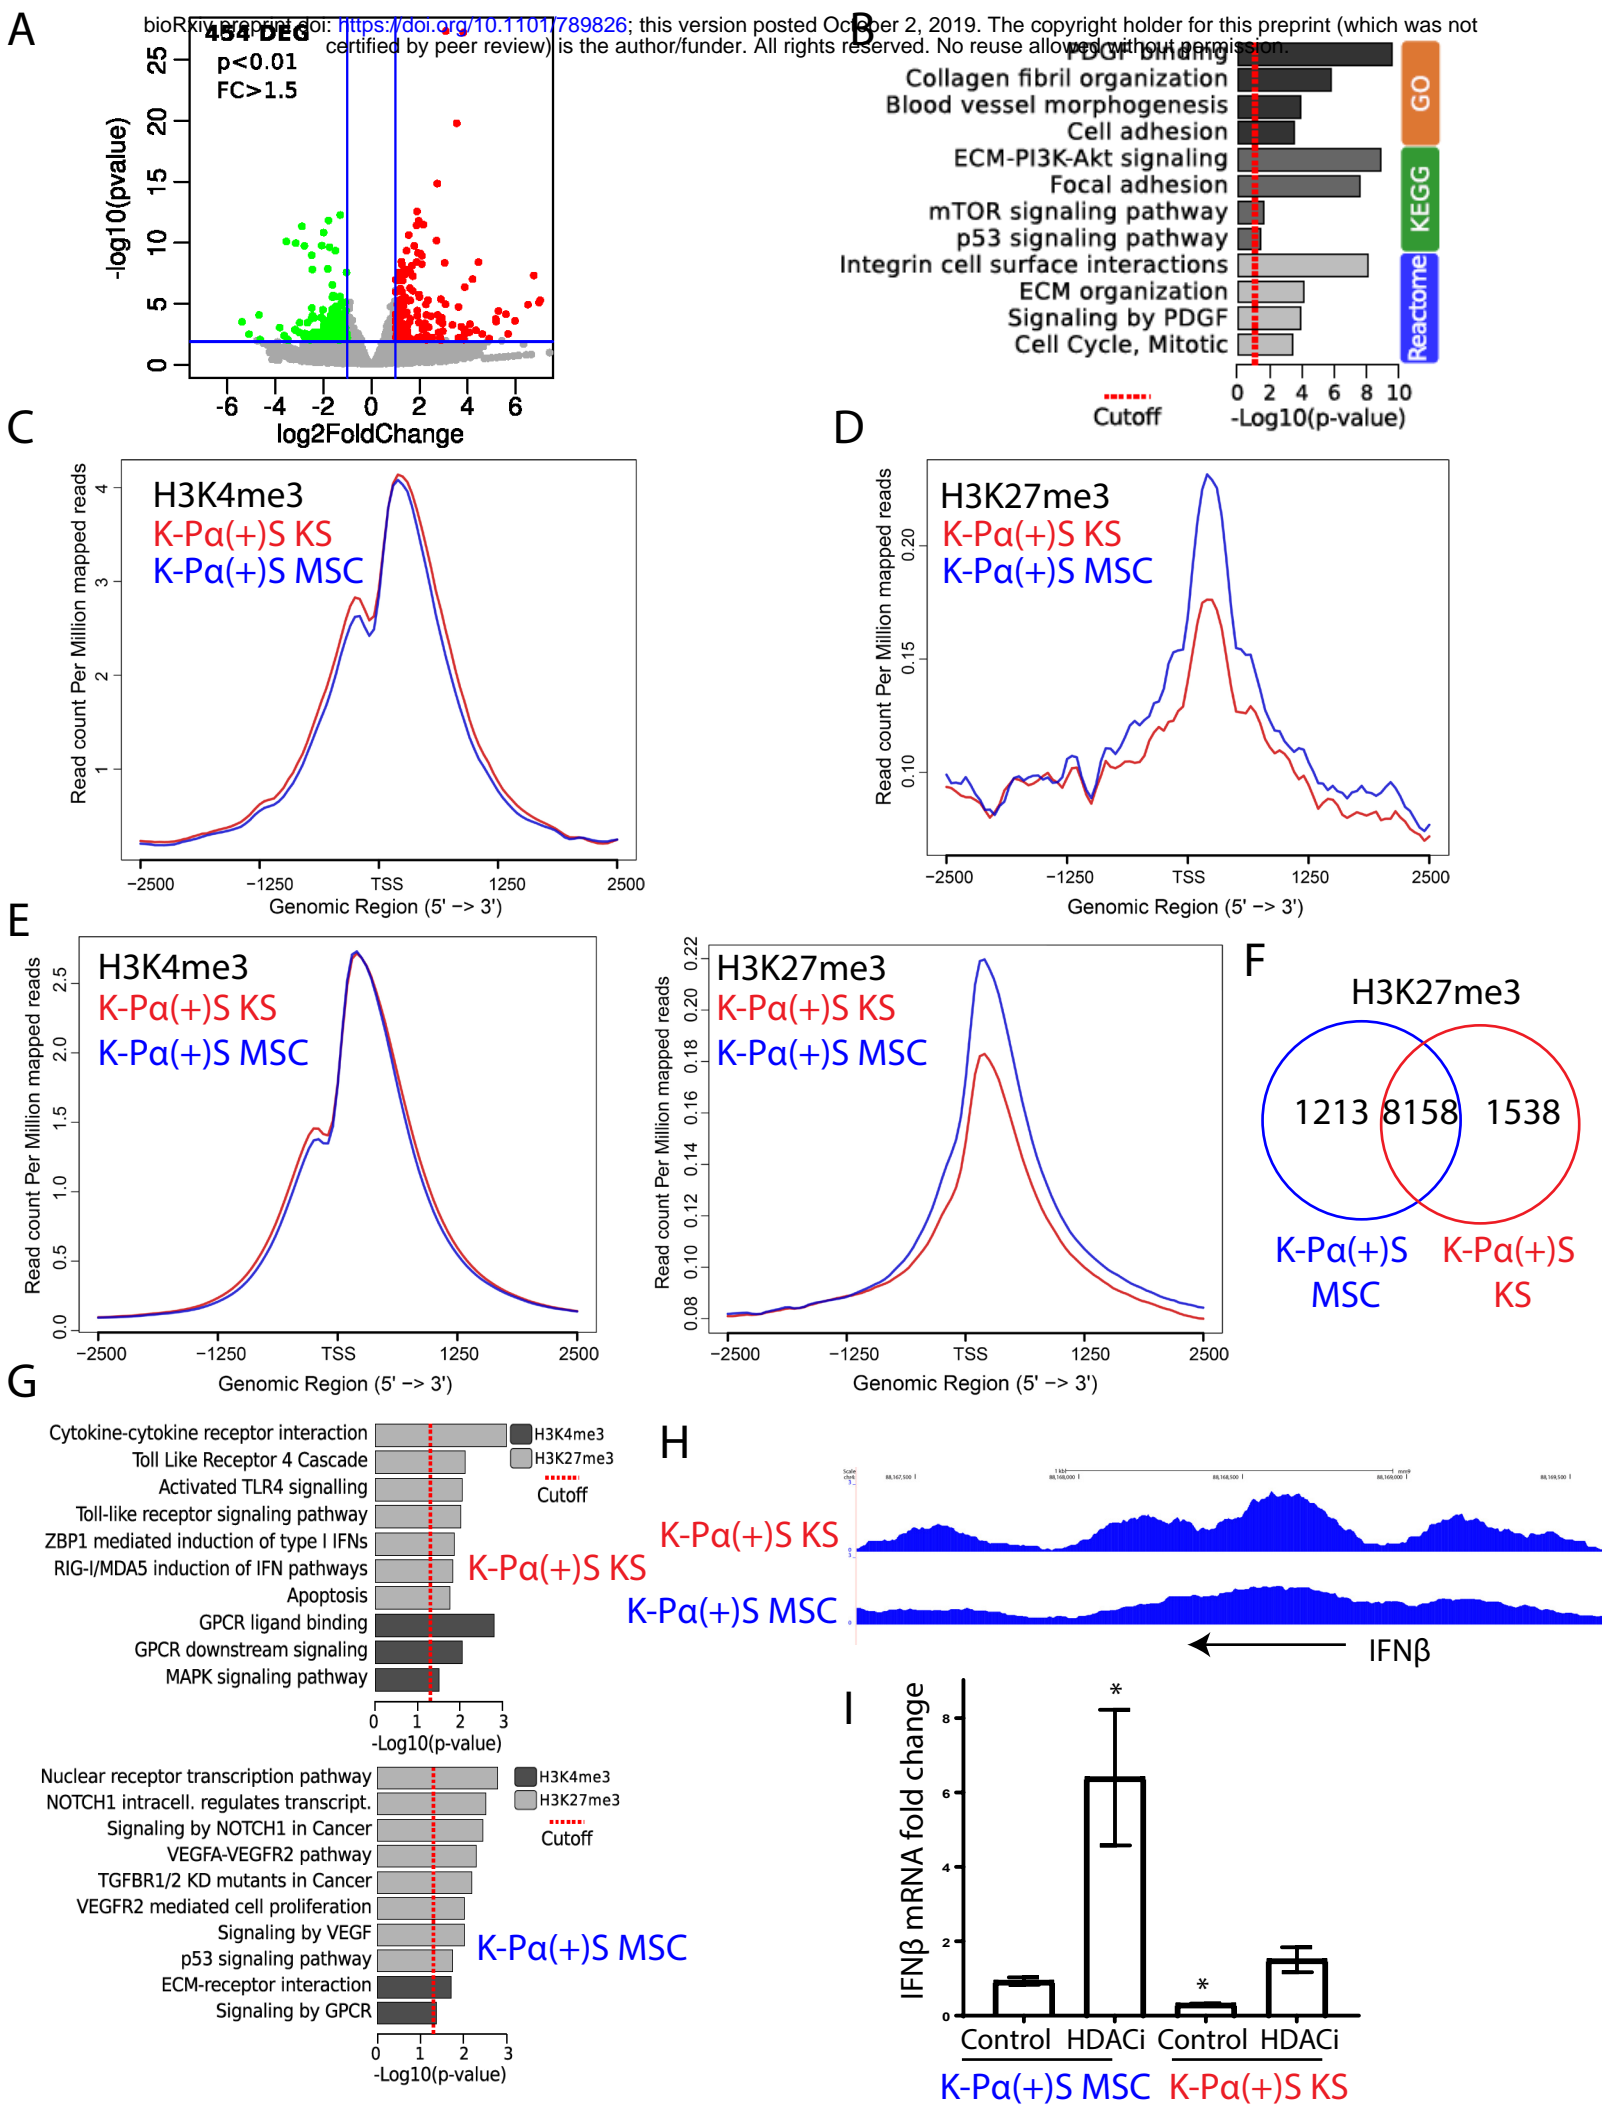



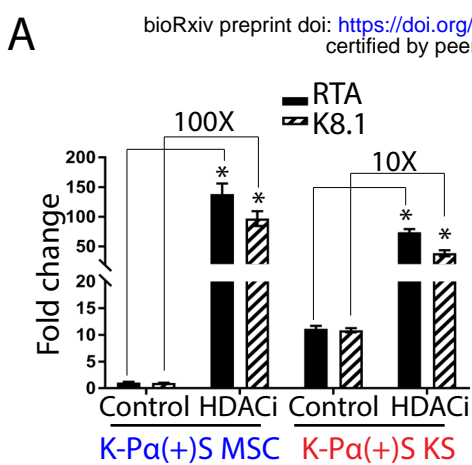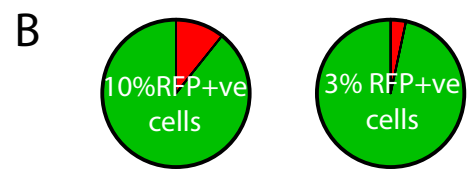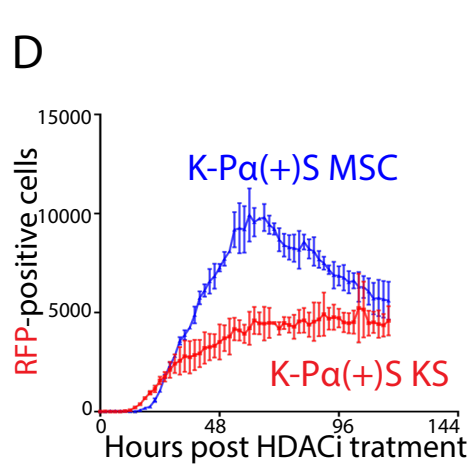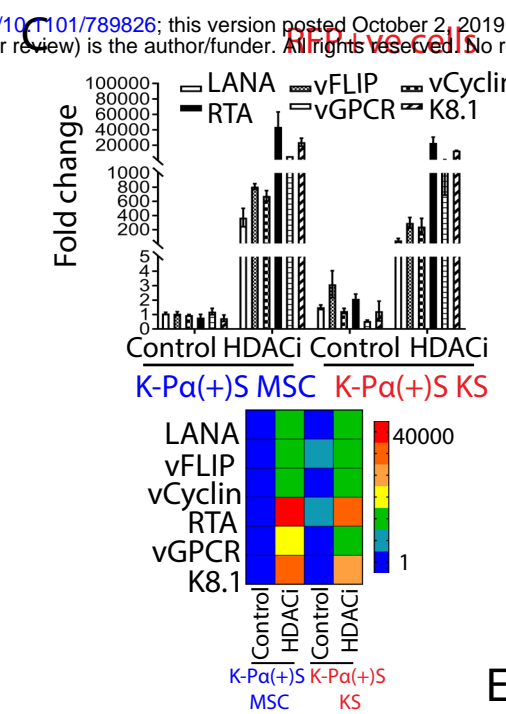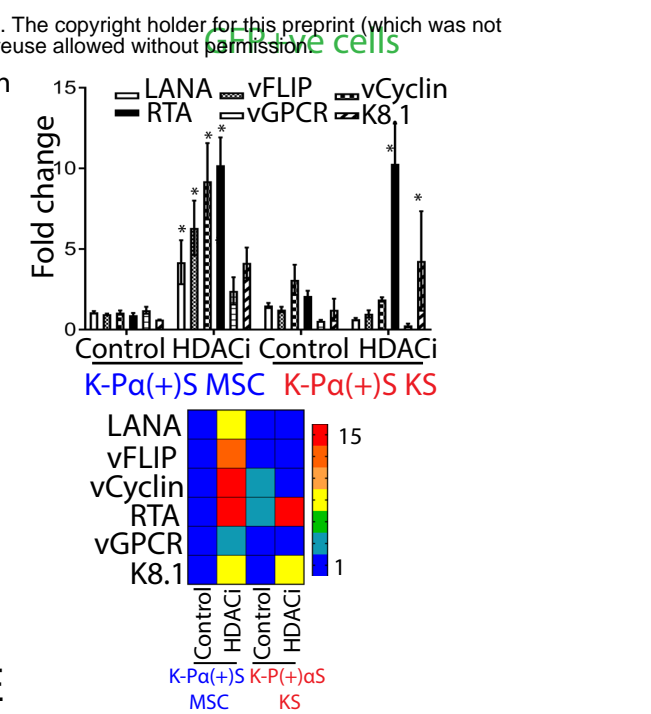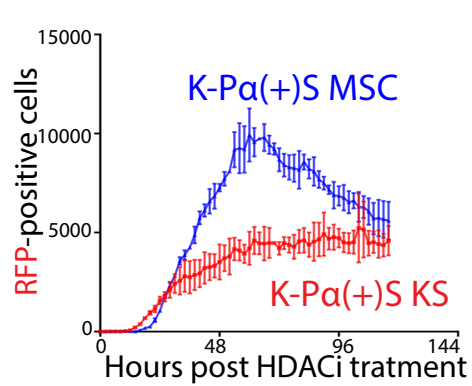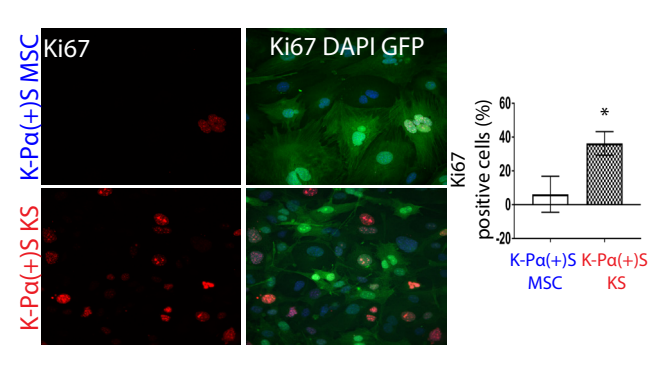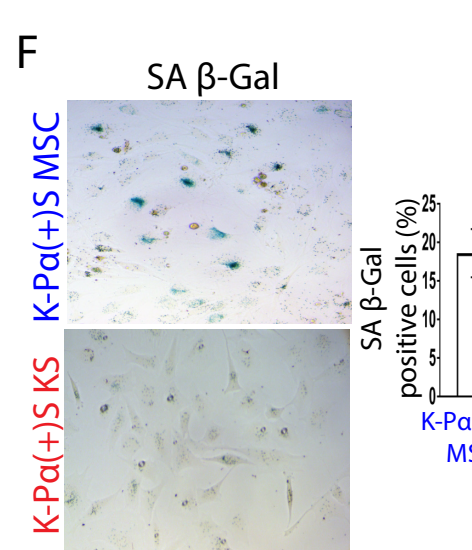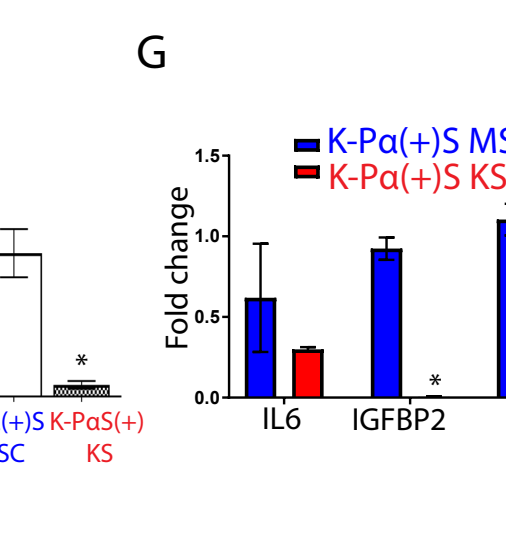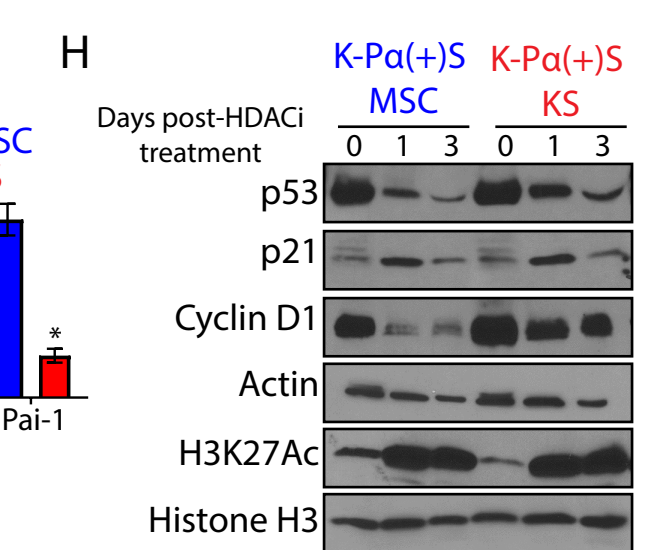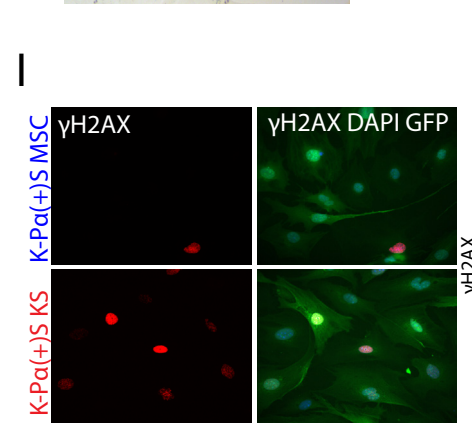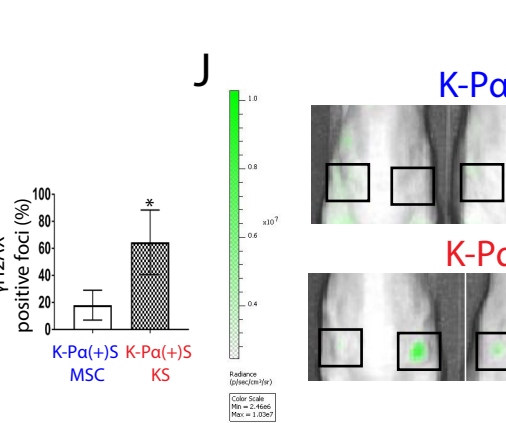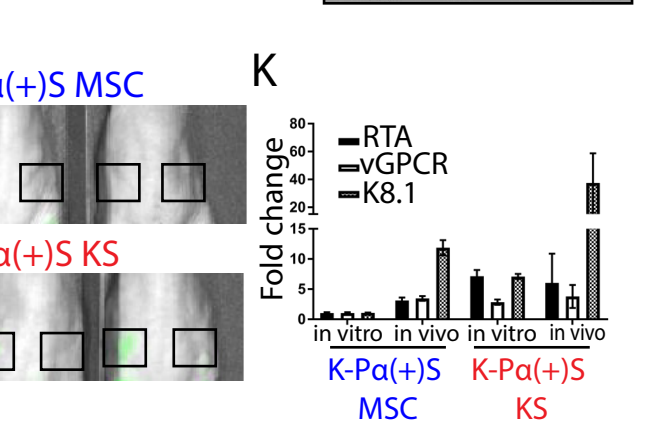

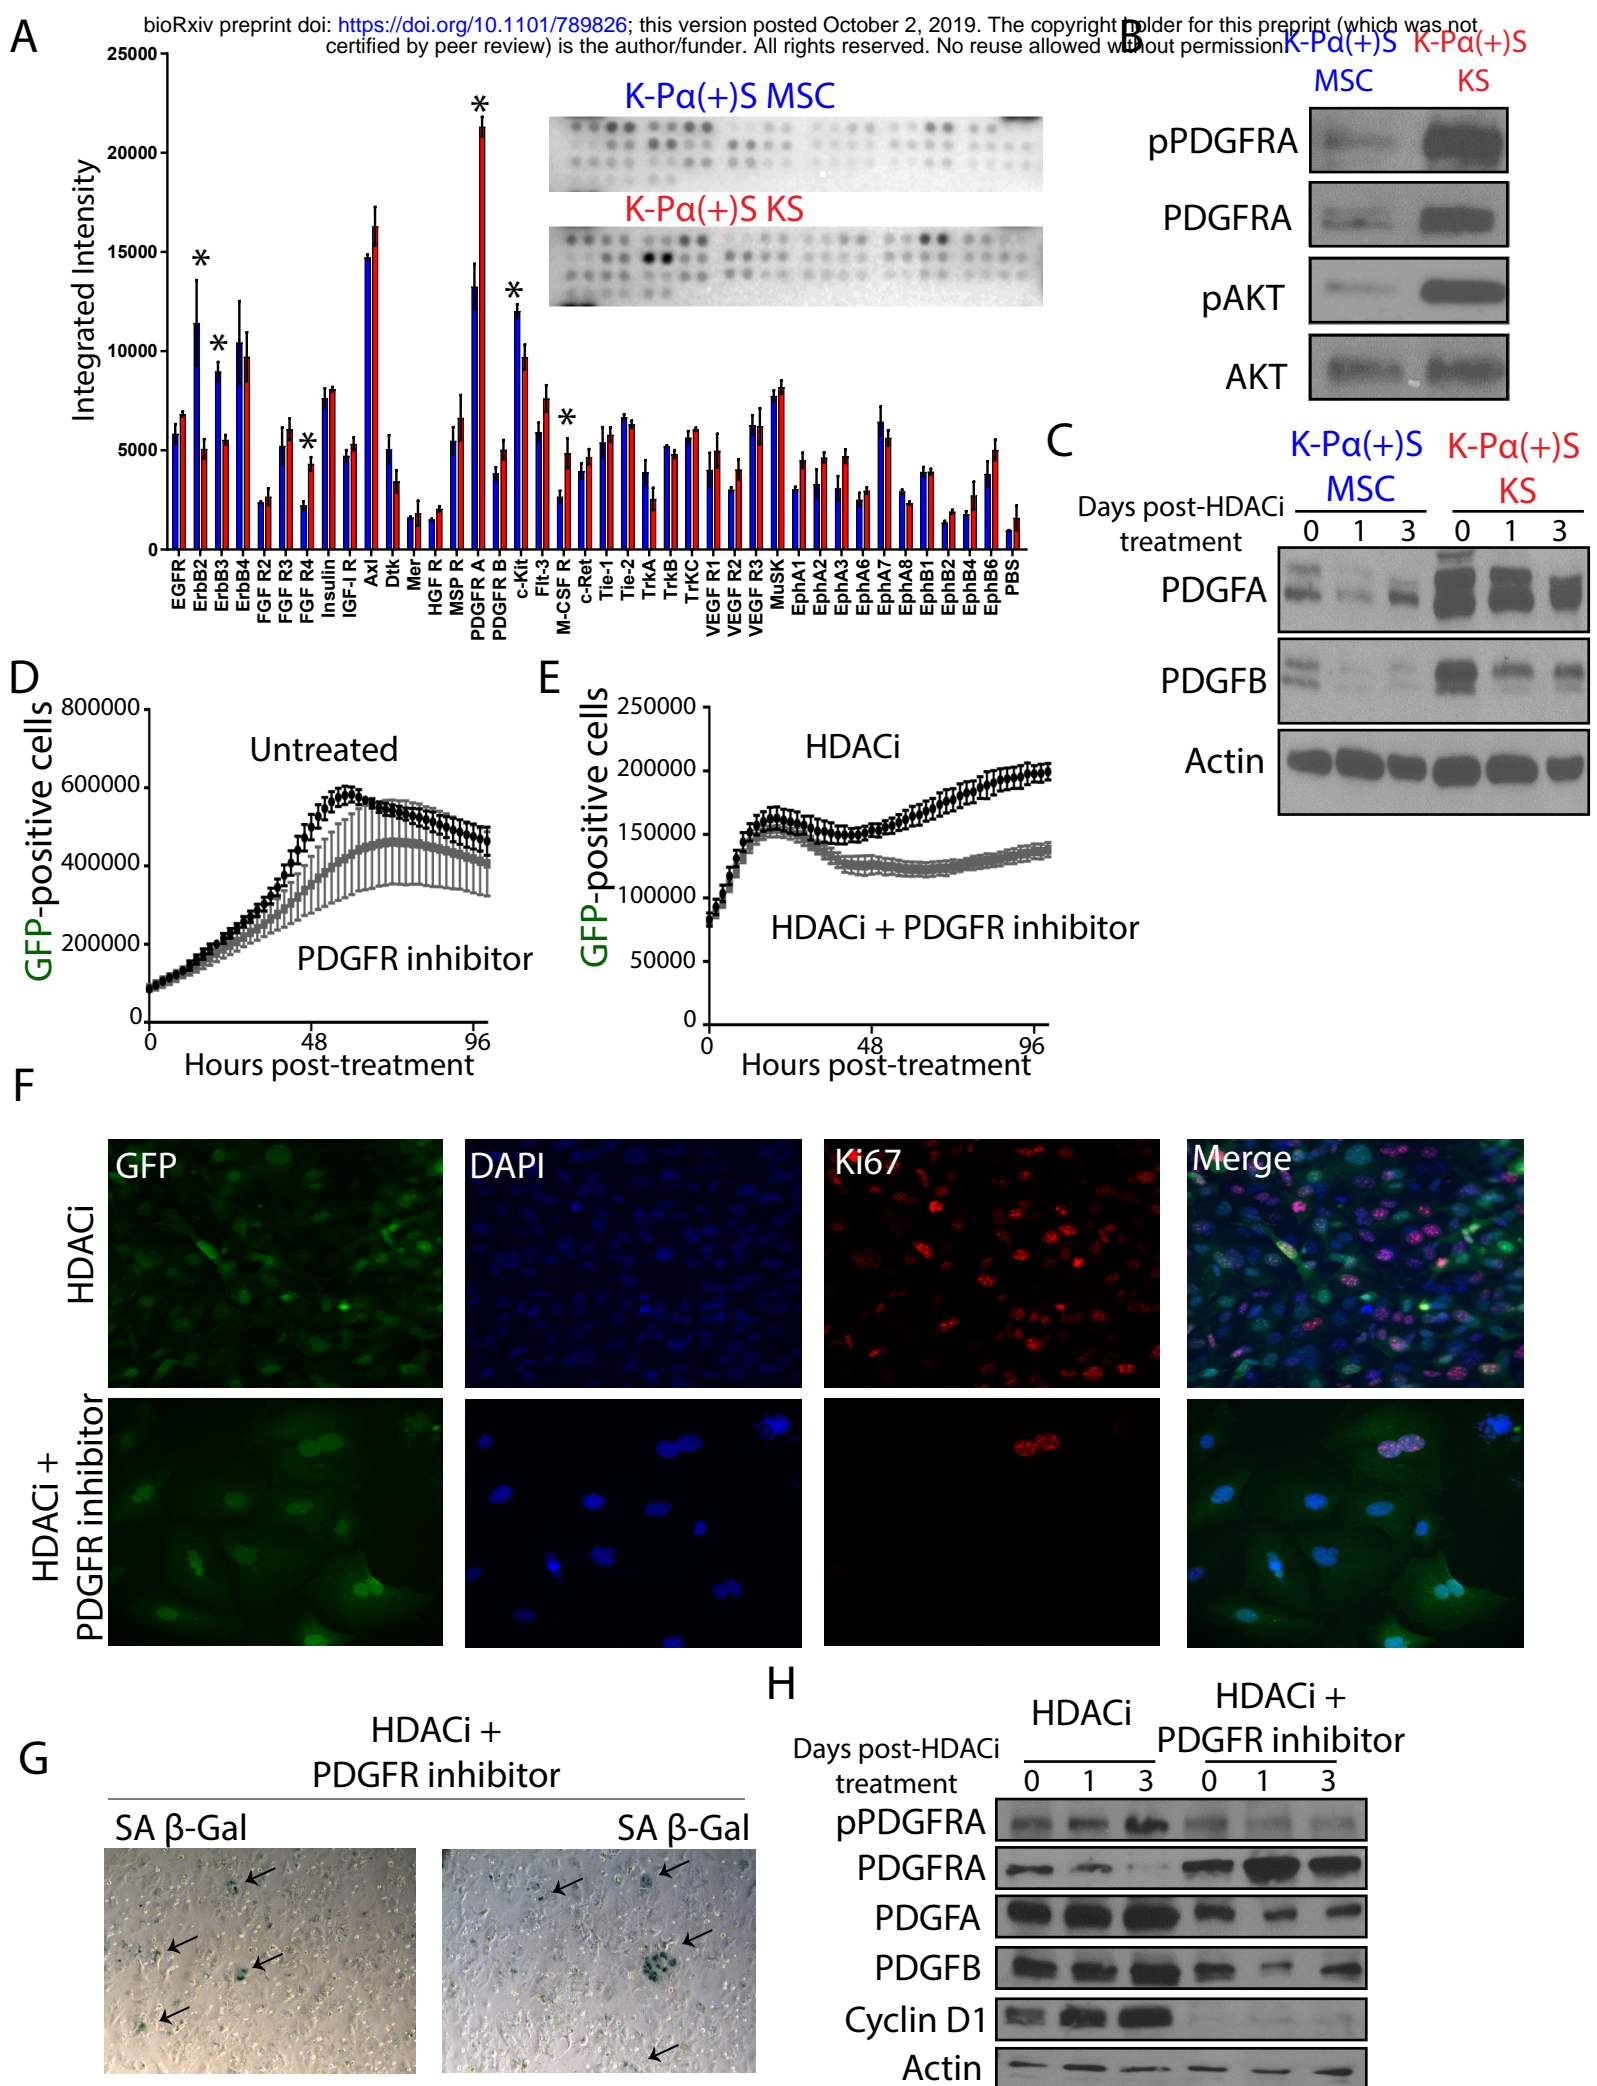

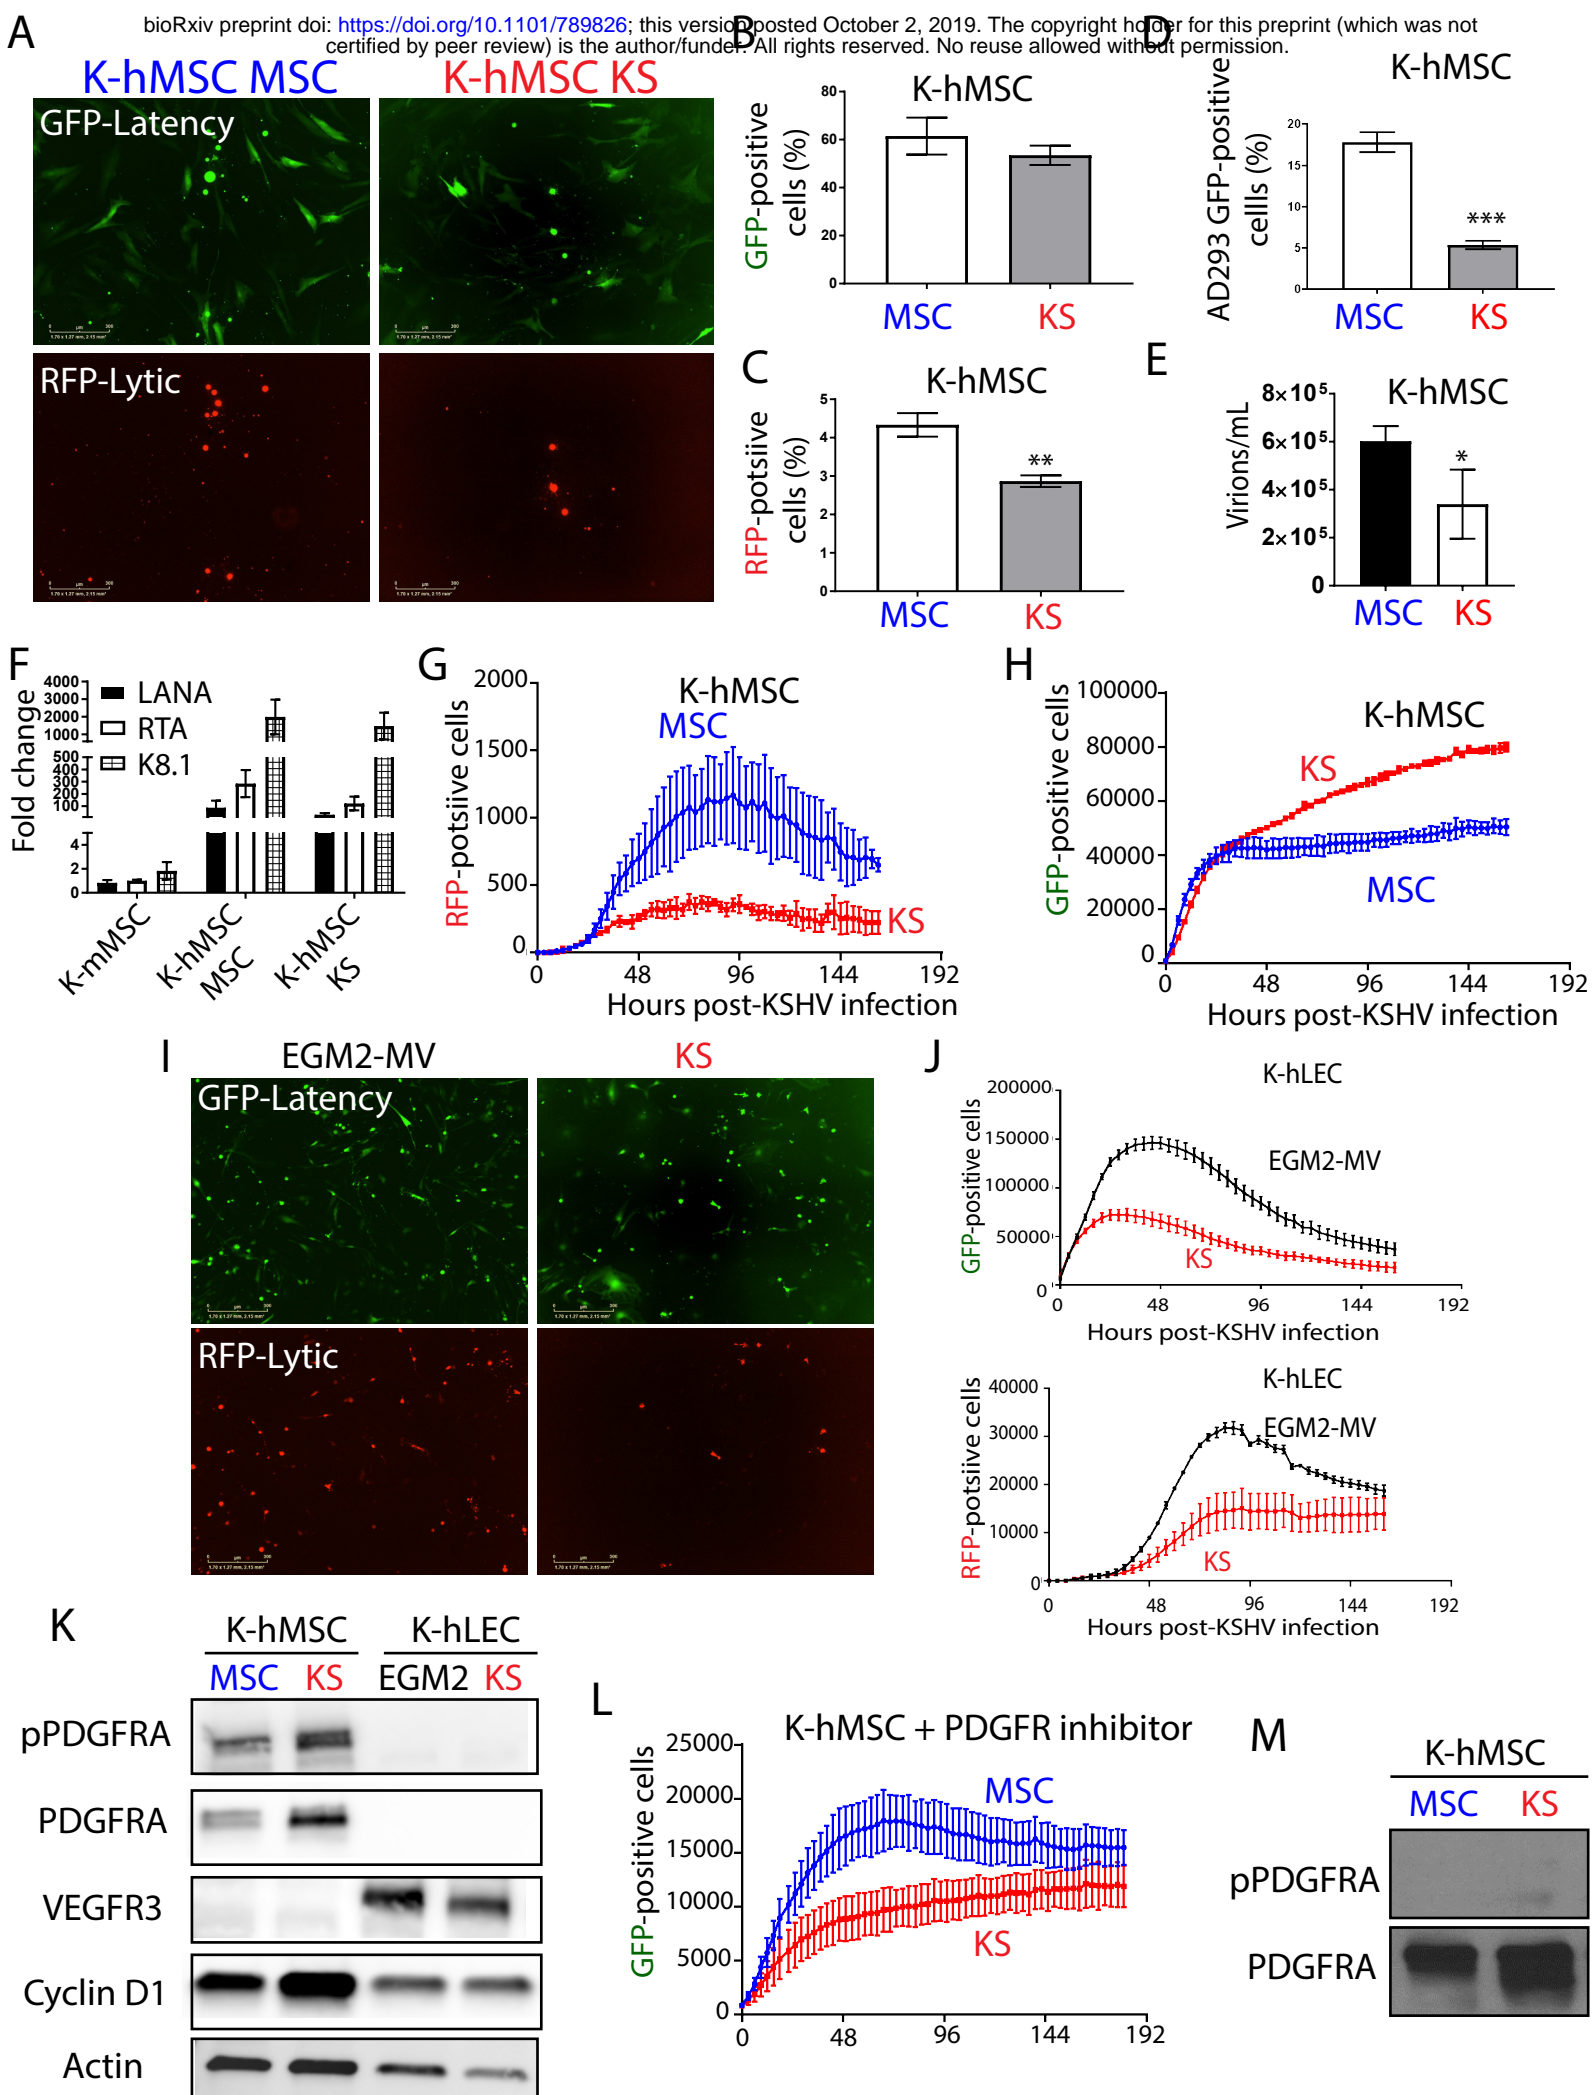

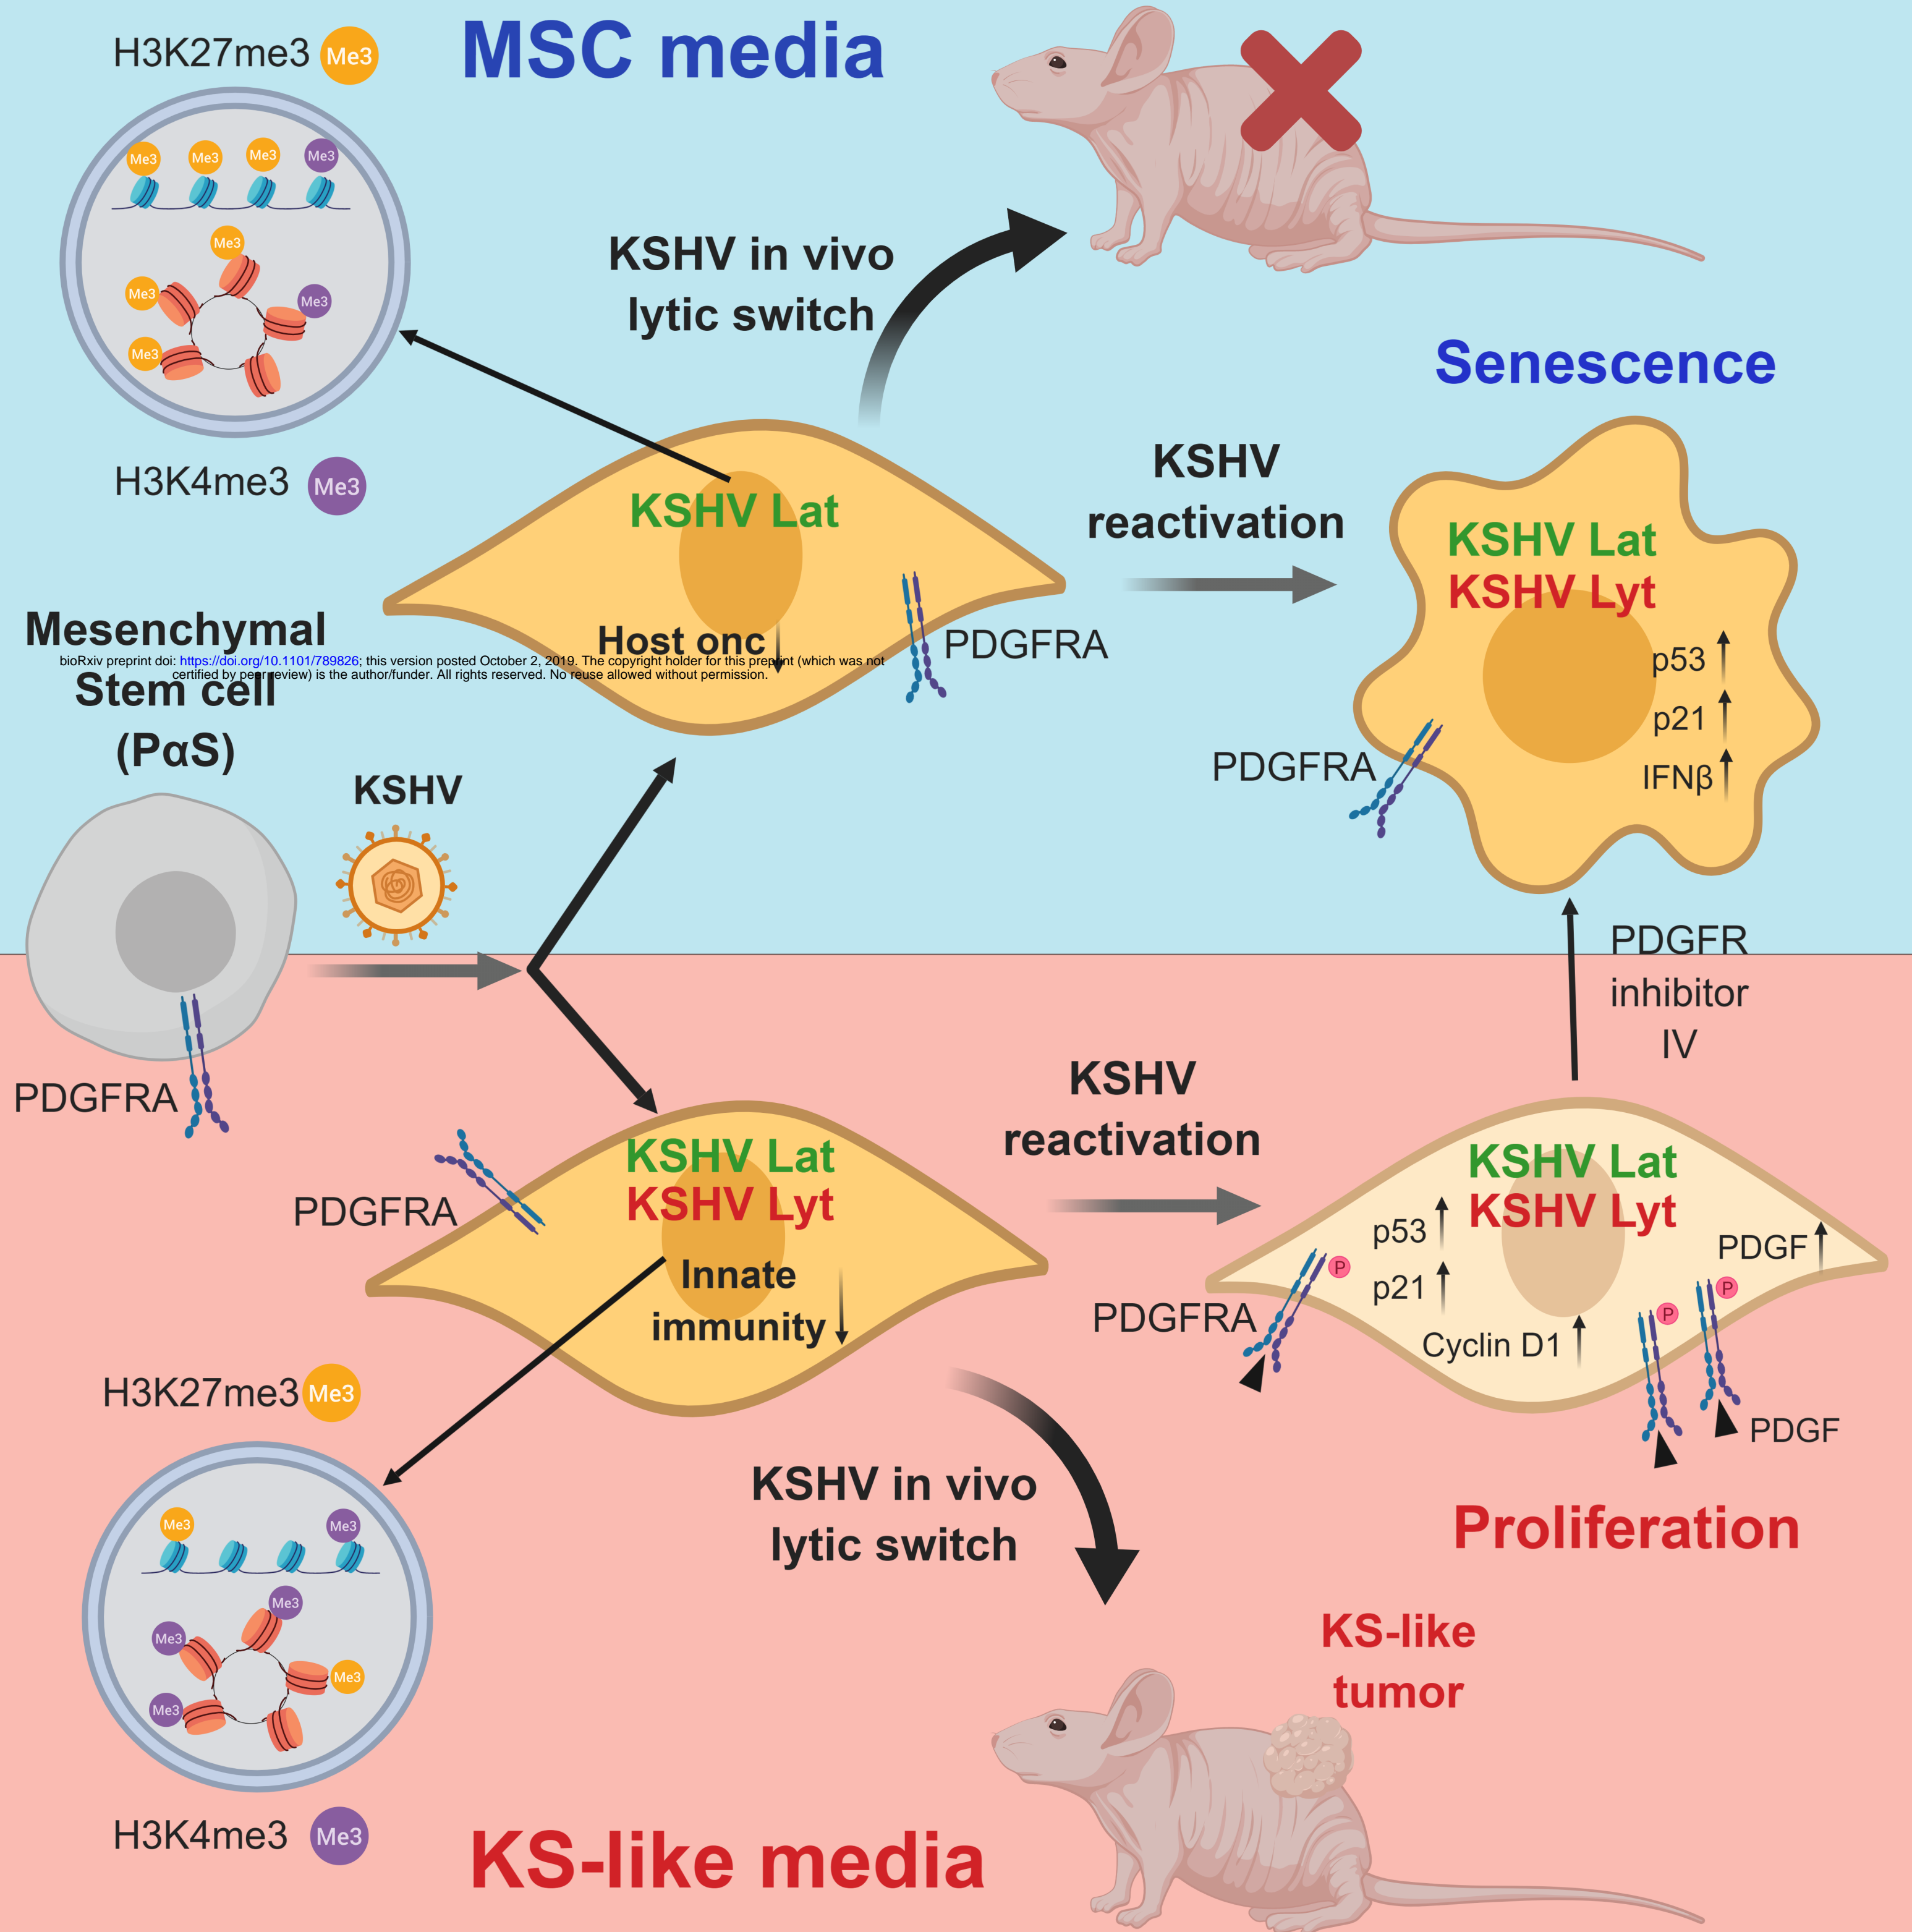

Source: https://www.biorxiv.org/content/biorxiv/early/2019/10/02/789826.full.pdf
